# Supplementary material
Source: publisher figshare collection journal article supplement (https://acs.figshare.com/ndownloader/files/3874522)
Supplement: Supplementary file 1 [file 3874522]

## Sheet: ctl_35_DEP.001
2007_id	2009_id	accession	gene	desc	ctl-a	ctl-b	ctl-c	35-a	35-b	35-c	mean(ctl)	mean(35)	ratio(35/ctl)	pvalue		FDR =	0.866879	%
AATC_HUMAN	AATC_HUMAN	P17174	GOT1	Aspartate aminotransferase, cytoplasmic - Homo sapiens (Human)	5	3	5	22	17	17	4.33333	18.6667	4.30769	0.000154298
ABCF1_HUMAN	ABCF1_HUMAN	Q8NE71	ABCF1	ATP-binding cassette sub-family F member 1 - Homo sapiens (Human)	2	2	3	10	9	11	2.33333	10	4.28571	0.00065687
ACON_HUMAN	ACON_HUMAN	Q99798	ACO2	Aconitate hydratase, mitochondrial precursor - Homo sapiens (Human)	12	15	16	50	53	50	14.3333	51	3.55814	1.91036e-05
ACPH_HUMAN	ACPH_HUMAN	P13798	APEH	Acylamino-acid-releasing enzyme - Homo sapiens (Human)	4	3	5	16	14	16	4	15.3333	3.83333	0.000293902
ACTB_HUMAN	ACTB_HUMAN	P60709	ACTB	Actin, cytoplasmic 1 - Homo sapiens (Human)	25	28	30	63	64	99	27.6667	75.3333	2.72289	1.91036e-05
ACTN1_HUMAN	ACTN1_HUMAN	P12814	ACTN1	Alpha-actinin-1 - Homo sapiens (Human)	26	38	37	133	103	110	33.6667	115.333	3.42574	0
ACTN4_HUMAN	ACTN4_HUMAN	O43707	ACTN4	Alpha-actinin-4 - Homo sapiens (Human)	23	20	27	110	77	71	23.3333	86	3.68571	1.46951e-06
ACY1_HUMAN	ACY1_HUMAN	Q03154	ACY1	Aminoacylase-1 - Homo sapiens (Human)	0.9	2	1	9	9	8	1	8.66667	8.66667	0.00041734
ADT1_HUMAN	ADT1_HUMAN	P12235	SLC25A4	ADP/ATP translocase 1 - Homo sapiens (Human)	15	13	17	5	5	6	15	5.33333	0.355556	0.000684791
AHNK_HUMAN	AHNK_HUMAN	Q09666	AHNAK	Neuroblast differentiation-associated protein AHNAK - Homo sapiens (Human)	245	270	234	145	157	174	249.667	158.667	0.635514	1.17561e-05
AL1B1_HUMAN	AL1B1_HUMAN	P30837	ALDH1B1	Aldehyde dehydrogenase X, mitochondrial precursor - Homo sapiens (Human)	0.9	0.9	0.9	13	11	8	0.9	10.6667	11.8519	0.00014842
ALDOA_HUMAN	ALDOA_HUMAN	P04075	ALDOA	Fructose-bisphosphate aldolase A - Homo sapiens (Human)	16	18	13	110	118	97	15.6667	108.333	6.91489	0
AMPL_HUMAN	AMPL_HUMAN	P28838	LAP3	Cytosol aminopeptidase - Homo sapiens (Human)	8	6	6	28	24	20	6.66667	24	3.6	0.000105805
AMRP_HUMAN	AMRP_HUMAN	P30533	LRPAP1	Alpha-2-macroglobulin receptor-associated protein precursor - Homo sapiens (Human)	0.9	1	1	6	5	13	0.666667	8	12	0.000371785
ANXA1_HUMAN	ANXA1_HUMAN	P04083	ANXA1	Annexin A1 - Homo sapiens (Human)	3	1	2	12	12	13	2	12.3333	6.16667	0.000192506
ANXA6_HUMAN	ANXA6_HUMAN	P08133	ANXA6	Annexin A6 - Homo sapiens (Human)	26	28	36	11	14	16	30	13.6667	0.455556	0.000362968
APMAP_HUMAN	APMAP_HUMAN	Q9HDC9	APMAP	Adipocyte plasma membrane-associated protein - Homo sapiens (Human)	4	2	4	22	14	19	3.33333	18.3333	5.5	8.81705e-05
APOD_HUMAN	APOD_HUMAN	P05090	APOD	Apolipoprotein D precursor - Homo sapiens (Human)	0.9	0.9	0.9	24	19	18	0.9	20.3333	22.5926	1.91036e-05
APOE_HUMAN	APOE_HUMAN	P02649	APOE	Apolipoprotein E precursor - Homo sapiens (Human)	4	2	1	21	17	13	2.33333	17	7.28571	6.46583e-05
APT_HUMAN	APT_HUMAN	P07741	APRT	Adenine phosphoribosyltransferase - Homo sapiens (Human)	2	3	1	14	6	8	2	9.33333	4.66667	0.000571639
ARF1_HUMAN	ARF1_HUMAN	P84077	ARF1	ADP-ribosylation factor 1 - Homo sapiens (Human)	12	12	11	25	24	31	11.6667	26.6667	2.28571	0.000420279
ARHG2_HUMAN	ARHG2_HUMAN	Q92974	ARHGEF2	Rho/Rac guanine nucleotide exchange factor 2 - Homo sapiens (Human)	0.9	0.9	0.9	11	5	12	0.9	9.33333	10.3704	0.000226304
ARMET_HUMAN	MANF_HUMAN	P55145	MANF	Protein ARMET precursor - Homo sapiens (Human)	0.9	0.9	0.9	7	10	5	0.9	7.33333	8.14815	0.00047759
ASC_HUMAN	ASC_HUMAN	Q9ULZ3	PYCARD	Apoptosis-associated speck-like protein containing a CARD - Homo sapiens (Human)	4	2	4	12	13	15	3.33333	13.3333	4	0.000364438
AT1A1_HUMAN	AT1A1_HUMAN	P05023	ATP1A1	Sodium/potassium-transporting ATPase subunit alpha-1 precursor - Homo sapiens (Human)	29	39	35	15	11	19	34.3333	15	0.436893	0.000232182
AT2A1_HUMAN	AT2A1_HUMAN	O14983	ATP2A1	Sarcoplasmic/endoplasmic reticulum calcium ATPase 1 - Homo sapiens (Human)	8	14	12	1	1	3	11.3333	1.66667	0.147059	0.00017928
ATD3A_HUMAN	ATD3A_HUMAN	Q9NVI7	ATAD3A	ATPase family AAA domain-containing protein 3A - Homo sapiens (Human)	6	5	5	22	22	12	5.33333	18.6667	3.5	0.000235121
ATPA_HUMAN	ATPA_HUMAN	P25705	ATP5A1	ATP synthase subunit alpha, mitochondrial precursor - Homo sapiens (Human)	28	30	31	110	109	108	29.6667	109	3.67416	0
ATPB_HUMAN	ATPB_HUMAN	P06576	ATP5B	ATP synthase subunit beta, mitochondrial precursor - Homo sapiens (Human)	43	41	45	124	116	139	43	126.333	2.93798	0
BASI_HUMAN	BASI_HUMAN	P35613	BSG	Basigin precursor - Homo sapiens (Human)	2	2	2	17	11	8	2	12	6	0.00020867
BTF3_HUMAN	BTF3_HUMAN	P20290	BTF3	Transcription factor BTF3 - Homo sapiens (Human)	0.9	0.9	0.9	8	12	7	0.9	9	10	0.000249816
BZW1_HUMAN	BZW1_HUMAN	Q7L1Q6	BZW1	Basic leucine zipper and W2 domain-containing protein 1 - Homo sapiens (Human)	0.9	1	1	5	10	9	0.666667	8	12	0.000371785
C1QBP_HUMAN	C1QBP_HUMAN	Q07021	C1QBP	Complement component 1 Q subcomponent-binding protein, mitochondrial precursor - Homo sapiens (Human)	2	0.9	2	15	11	5	1.33333	10.3333	7.75	0.00029978
CALR_HUMAN	CALR_HUMAN	P27797	CALR	Calreticulin precursor - Homo sapiens (Human)	11	9	16	65	48	50	12	54.3333	4.52778	5.87803e-06
CALU_HUMAN	CALU_HUMAN	O43852	CALU	Calumenin precursor - Homo sapiens (Human)	5	9	7	20	25	35	7	26.6667	3.80952	6.75974e-05
CALX_HUMAN	CALX_HUMAN	P27824	CANX	Calnexin precursor - Homo sapiens (Human)	10	10	8	58	50	56	9.33333	54.6667	5.85714	1.46951e-06
CAP1_HUMAN	CAP1_HUMAN	Q01518	CAP1	Adenylyl cyclase-associated protein 1 - Homo sapiens (Human)	10	8	9	28	22	20	9	23.3333	2.59259	0.000355621
CAPG_HUMAN	CAPG_HUMAN	P40121	CAPG	Macrophage-capping protein - Homo sapiens (Human)	21	16	8	44	43	40	15	42.3333	2.82222	6.17193e-05
CATA_HUMAN	CATA_HUMAN	P04040	CAT	Catalase - Homo sapiens (Human)	1	3	1	30	8	14	1.66667	17.3333	10.4	4.84938e-05
CATB_HUMAN	CATB_HUMAN	P07858	CTSB	Cathepsin B precursor - Homo sapiens (Human)	4	2	9	20	24	15	5	19.6667	3.93333	0.000174871
CATD_HUMAN	CATD_HUMAN	P07339	CTSD	Cathepsin D precursor - Homo sapiens (Human)	70	37	68	92	109	93	58.3333	98	1.68	0.000105805
CD63_HUMAN	CD63_HUMAN	P08962	CD63	CD63 antigen - Homo sapiens (Human)	13	17	20	25	45	42	16.6667	37.3333	2.24	0.000201323
CH10_HUMAN	CH10_HUMAN	P61604	HSPE1	10 kDa heat shock protein, mitochondrial - Homo sapiens (Human)	5	7	8	17	20	18	6.66667	18.3333	2.75	0.000461425
CH60_HUMAN	CH60_HUMAN	P10809	HSPD1	60 kDa heat shock protein, mitochondrial precursor - Homo sapiens (Human)	35	32	33	289	219	244	33.3333	250.667	7.52	0
CKAP4_HUMAN	CKAP4_HUMAN	Q07065	CKAP4	Cytoskeleton-associated protein 4 - Homo sapiens (Human)	3	6	4	44	32	32	4.33333	36	8.30769	5.87803e-06
CLH1_HUMAN	CLH1_HUMAN	Q00610	CLTC	Clathrin heavy chain 1 - Homo sapiens (Human)	80	83	60	29	20	28	74.3333	25.6667	0.345291	7.34754e-06
COF1_HUMAN	COF1_HUMAN	P23528	CFL1	Cofilin-1 - Homo sapiens (Human)	6	10	13	42	40	35	9.66667	39	4.03448	2.49816e-05
COPA_HUMAN	COPA_HUMAN	P53621	COPA	Coatomer subunit alpha - Homo sapiens (Human)	15	16	12	0.9	1	1	14.3333	0.666667	0.0465116	4.40852e-05
COR1C_HUMAN	COR1C_HUMAN	Q9ULV4	CORO1C	Coronin-1C - Homo sapiens (Human)	10	7	6	0.9	0.9	0.9	7.66667	0.9	0.117391	0.00041881
CP51A_HUMAN	CP51A_HUMAN	Q16850	CYP51A1	Cytochrome P450 51A1 - Homo sapiens (Human)	3	2	2	11	8	9	2.33333	9.33333	4	0.000887583
CPT2_HUMAN	CPT2_HUMAN	P23786	CPT2	Carnitine O-palmitoyltransferase 2, mitochondrial precursor - Homo sapiens (Human)	2	4	3	11	9	13	3	11	3.66667	0.000727406
CRYL1_HUMAN	CRYL1_HUMAN	Q9Y2S2	CRYL1	Lambda-crystallin homolog - Homo sapiens (Human)	4	9	9	0.9	0.9	0.9	7.33333	0.9	0.122727	0.000454078
CSPG4_HUMAN	CSPG4_HUMAN	Q6UVK1	CSPG4	Chondroitin sulfate proteoglycan 4 precursor - Homo sapiens (Human)	3	7	3	25	17	24	4.33333	22	5.07692	6.17193e-05
CTNA1_HUMAN	CTNA1_HUMAN	P35221	CTNNA1	Catenin alpha-1 - Homo sapiens (Human)	8	11	9	4	2	0.9	9.33333	2	0.214286	0.000787656
CYFP1_HUMAN	CYFP1_HUMAN	Q7L576	CYFIP1	Cytoplasmic FMR1-interacting protein 1 - Homo sapiens (Human)	7	10	7	0.9	1	1	8	0.666667	0.0833333	0.000362968
CYGB_HUMAN	CYGB_HUMAN	Q8WWM9	CYGB	Cytoglobin - Homo sapiens (Human)	6	2	5	26	26	17	4.33333	23	5.30769	5.87803e-05
DDX3X_HUMAN	DDX3X_HUMAN	O00571	DDX3X	ATP-dependent RNA helicase DDX3X - Homo sapiens (Human)	1	3	3	8	11	10	2.33333	9.66667	4.14286	0.00074504
DDX5_HUMAN	DDX5_HUMAN	P17844	DDX5	Probable ATP-dependent RNA helicase DDX5 - Homo sapiens (Human)	1	1	1	9	7	7	1	7.66667	7.66667	0.000426157
DESM_HUMAN	DESM_HUMAN	P17661	DES	Desmin - Homo sapiens (Human)	12	14	13	1	2	7	13	3.33333	0.25641	0.000402645
DHX30_HUMAN	DHX30_HUMAN	Q7L2E3	DHX30	Putative ATP-dependent RNA helicase DHX30 - Homo sapiens (Human)	2	1	2	10	5	11	1.66667	8.66667	5.2	0.00053784
DHX9_HUMAN	DHX9_HUMAN	Q08211	DHX9	ATP-dependent RNA helicase A - Homo sapiens (Human)	17	12	12	1	1	3	13.6667	1.66667	0.121951	9.11095e-05
DNJCD_HUMAN	DJC13_HUMAN	O75165	DNAJC13	DnaJ homolog subfamily C member 13 - Homo sapiens (Human)	14	17	17	1	1	2	16	1.33333	0.0833333	4.26157e-05
DPP4_HUMAN	DPP4_HUMAN	P27487	DPP4	Dipeptidyl peptidase 4 - Homo sapiens (Human)	31	25	19	0.9	0.9	0.9	25	0.9	0.036	1.46951e-06
DYHC_HUMAN	DYHC1_HUMAN	Q14204	DYNC1H1	Dynein heavy chain, cytosolic - Homo sapiens (Human)	167	186	149	0.9	2	3	167.333	1.66667	0.00996016	0
E2AK2_HUMAN	E2AK2_HUMAN	P19525	EIF2AK2	Interferon-induced, double-stranded RNA-activated protein kinase - Homo sapiens (Human)	0.9	2	0.9	12	5	5	0.666667	7.33333	11	0.000839089
ECH1_HUMAN	ECH1_HUMAN	Q13011	ECH1	Delta(3,5)-Delta(2,4)-dienoyl-CoA isomerase, mitochondrial precursor - Homo sapiens (Human)	1	2	3	11	10	5	2	8.66667	4.33333	0.000850845
ECHA_HUMAN	ECHA_HUMAN	P40939	HADHA	Trifunctional enzyme subunit alpha, mitochondrial precursor - Homo sapiens (Human)	25	28	29	58	62	79	27.3333	66.3333	2.42683	4.11462e-05
ECHB_HUMAN	ECHB_HUMAN	P55084	HADHB	Trifunctional enzyme subunit beta, mitochondrial precursor - Homo sapiens (Human)	12	6	12	24	11	57	10	30.6667	3.06667	9.99265e-05
EF1G_HUMAN	EF1G_HUMAN	P26641	EEF1G	Elongation factor 1-gamma - Homo sapiens (Human)	7	19	5	22	26	20	10.3333	22.6667	2.19355	0.000803821
EF2_HUMAN	EF2_HUMAN	P13639	EEF2	Elongation factor 2 - Homo sapiens (Human)	16	16	23	69	51	47	18.3333	55.6667	3.03636	2.20426e-05
EFTU_HUMAN	EFTU_HUMAN	P49411	TUFM	Elongation factor Tu, mitochondrial precursor - Homo sapiens (Human)	13	5	10	26	31	21	9.33333	26	2.78571	0.000201323
ENO1B_HUMAN	N/A	N/A	N/A	Alpha-enolase, lung specific - Homo sapiens (Human)	5	5	7	26	26	34	5.66667	28.6667	5.05882	4.11462e-05
ENOA_HUMAN	ENOA_HUMAN	P06733	ENO1	Alpha-enolase - Homo sapiens (Human)	23	17	22	160	149	172	20.6667	160.333	7.75806	0
ENPL_HUMAN	ENPL_HUMAN	P14625	HSP90B1	Endoplasmin precursor - Homo sapiens (Human)	27	33	28	185	151	144	29.3333	160	5.45455	0
ETFA_HUMAN	ETFA_HUMAN	P13804	ETFA	Electron transfer flavoprotein subunit alpha, mitochondrial precursor - Homo sapiens (Human)	5	9	21	28	36	23	11.6667	29	2.48571	0.000248347
ETFB_HUMAN	ETFB_HUMAN	P38117	ETFB	Electron transfer flavoprotein subunit beta - Homo sapiens (Human)	9	0.9	6	22	15	7	5	14.6667	2.93333	0.000850845
EZRI_HUMAN	EZRI_HUMAN	P15311	EZR	Ezrin - Homo sapiens (Human)	10	15	7	21	23	25	10.6667	23	2.15625	0.000839089
FAS_HUMAN	FAS_HUMAN	P49327	FASN	Fatty acid synthase - Homo sapiens (Human)	61	69	57	25	31	25	62.3333	27	0.433155	5.87803e-05
FBRL_HUMAN	FBRL_HUMAN	P22087	FBL	rRNA 2'-O-methyltransferase fibrillarin - Homo sapiens (Human)	2	2	1	8	9	7	1.66667	8	4.8	0.000843497
FINC_HUMAN	FINC_HUMAN	P02751	FN1	Fibronectin precursor - Homo sapiens (Human)	1	1	2	26	24	22	1.33333	24	18	5.87803e-06
FLNB_HUMAN	FLNB_HUMAN	O75369	FLNB	Filamin-B - Homo sapiens (Human)	0.9	1	2	19	9	9	1	12.3333	12.3333	0.000104335
G3P_HUMAN	G3P_HUMAN	P04406	GAPDH	Glyceraldehyde-3-phosphate dehydrogenase - Homo sapiens (Human)	34	44	33	154	165	181	37	166.667	4.5045	0
G6PI_HUMAN	G6PI_HUMAN	P06744	GPI	Glucose-6-phosphate isomerase - Homo sapiens (Human)	16	11	17	65	50	47	14.6667	54	3.68182	1.61646e-05
GANAB_HUMAN	GANAB_HUMAN	Q14697	GANAB	Neutral alpha-glucosidase AB precursor - Homo sapiens (Human)	26	22	15	91	91	85	21	89	4.2381	0
GCS1_HUMAN	MOGS_HUMAN	Q13724	MOGS	Mannosyl-oligosaccharide glucosidase - Homo sapiens (Human)	1	1	3	9	20	10	1.66667	13	7.8	0.000113152
GDF15_HUMAN	GDF15_HUMAN	Q99988	GDF15	Growth/differentiation factor 15 precursor - Homo sapiens (Human)	0.9	0.9	0.9	44	33	28	0.9	35	38.8889	0
GDN_HUMAN	GDN_HUMAN	P07093	SERPINE2	Glia-derived nexin precursor - Homo sapiens (Human)	0.9	0.9	0.9	38	28	32	0.9	32.6667	36.2963	1.46951e-06
GELS_HUMAN	GELS_HUMAN	P06396	GSN	Gelsolin precursor - Homo sapiens (Human)	43	48	44	146	104	114	45	121.333	2.6963	1.46951e-06
GFPT1_HUMAN	GFPT1_HUMAN	Q06210	GFPT1	Glucosamine--fructose-6-phosphate aminotransferase [isomerizing] 1 - Homo sapiens (Human)	0.9	0.9	0.9	9	15	5	0.9	9.66667	10.7407	0.000183688
GLU2B_HUMAN	GLU2B_HUMAN	P14314	PRKCSH	Glucosidase 2 subunit beta precursor - Homo sapiens (Human)	4	5	4	24	36	22	4.33333	27.3333	6.30769	2.49816e-05
GLYM_HUMAN	GLYM_HUMAN	P34897	SHMT2	Serine hydroxymethyltransferase, mitochondrial precursor - Homo sapiens (Human)	4	6	6	14	19	15	5.33333	16	3	0.000470242
GMPR1_HUMAN	GMPR1_HUMAN	P36959	GMPR	GMP reductase 1 - Homo sapiens (Human)	3	1	1	9	12	7	1.66667	9.33333	5.6	0.000426157
GNL3_HUMAN	GNL3_HUMAN	Q9BVP2	GNL3	Guanine nucleotide-binding protein-like 3 - Homo sapiens (Human)	0.9	0.9	0.9	6	12	10	0.9	9.33333	10.3704	0.000226304
GOGA4_HUMAN	GOGA4_HUMAN	Q13439	GOLGA4	Golgin subfamily A member 4 - Homo sapiens (Human)	1	4	2	13	8	15	2.33333	12	5.14286	0.000280676
GOGB1_HUMAN	GOGB1_HUMAN	Q14789	GOLGB1	Golgin subfamily B member 1 - Homo sapiens (Human)	2	3	2	15	15	20	2.33333	16.6667	7.14286	6.46583e-05
GRP75_HUMAN	GRP75_HUMAN	P38646	HSPA9	Stress-70 protein, mitochondrial precursor - Homo sapiens (Human)	21	31	28	75	69	76	26.6667	73.3333	2.75	1.91036e-05
GRP78_HUMAN	GRP78_HUMAN	P11021	HSPA5	78 kDa glucose-regulated protein precursor - Homo sapiens (Human)	31	36	41	269	184	189	36	214	5.94444	0
GUAA_HUMAN	GUAA_HUMAN	P49915	GMPS	GMP synthase [glutamine-hydrolyzing] - Homo sapiens (Human)	1	2	1	7	9	7	1.33333	7.66667	5.75	0.000703894
H11_HUMAN	H11_HUMAN	Q02539	HIST1H1A	Histone H1.1 - Homo sapiens (Human)	9	8	10	2	2	1	9	1.66667	0.185185	0.00044673
H15_HUMAN	H15_HUMAN	P16401	HIST1H1B	Histone H1.5 - Homo sapiens (Human)	10	9	4	1	2	1	7.66667	1.33333	0.173913	0.000631888
H2B1B_HUMAN	H2B1B_HUMAN	P33778	HIST1H2BB	Histone H2B type 1-B - Homo sapiens (Human)	20	16	22	108	99	78	19.3333	95	4.91379	0
H4_HUMAN	H4_HUMAN	P62805	HIST1H4A	Histone H4 - Homo sapiens (Human)	34	23	23	59	82	47	26.6667	62.6667	2.35	4.84938e-05
HBA_HUMAN	HBA_HUMAN	P69905	HBA1	Hemoglobin subunit alpha - Homo sapiens (Human)	0.9	0.9	0.9	1	11	9	0.9	7	7.77778	0.000590742
HNRL2_HUMAN	HNRL2_HUMAN	Q1KMD3	HNRNPUL2	Heterogeneous nuclear ribonucleoprotein U-like protein 2 - Homo sapiens (Human)	1	4	0.9	17	16	7	1.66667	13.3333	8	0.000154298
HNRPQ_HUMAN	HNRPQ_HUMAN	O60506	SYNCRIP	Heterogeneous nuclear ribonucleoprotein Q - Homo sapiens (Human)	8	6	5	38	36	28	6.33333	34	5.36842	1.91036e-05
HNRPR_HUMAN	HNRPR_HUMAN	O43390	HNRNPR	Heterogeneous nuclear ribonucleoprotein R - Homo sapiens (Human)	3	3	4	15	15	17	3.33333	15.6667	4.7	0.000183688
HNRPU_HUMAN	HNRPU_HUMAN	Q00839	HNRNPU	Heterogeneous nuclear ribonucleoprotein U - Homo sapiens (Human)	15	17	9	38	29	22	13.6667	29.6667	2.17073	0.00041734
HS90A_HUMAN	HS90A_HUMAN	P07900	HSP90AA1	Heat shock protein HSP 90-alpha - Homo sapiens (Human)	52	51	45	92	58	76	49.3333	75.3333	1.52703	0.000470242
HS90B_HUMAN	HS90B_HUMAN	P08238	HSP90AB1	Heat shock protein HSP 90-beta - Homo sapiens (Human)	11	10	18	79	79	63	13	73.6667	5.66667	0
HSP74_HUMAN	HSP74_HUMAN	P34932	HSPA4	Heat shock 70 kDa protein 4 - Homo sapiens (Human)	15	14	13	37	32	38	14	35.6667	2.54762	0.000144012
HSP7C_HUMAN	HSP7C_HUMAN	P11142	HSPA8	Heat shock cognate 71 kDa protein - Homo sapiens (Human)	31	29	29	112	98	91	29.6667	100.333	3.38202	1.46951e-06
HUWE1_HUMAN	HUWE1_HUMAN	Q7Z6Z7	HUWE1	E3 ubiquitin-protein ligase HUWE1 - Homo sapiens (Human)	6	8	5	0.9	0.9	0.9	6.33333	0.9	0.142105	0.000824394
HYEP_HUMAN	HYEP_HUMAN	P07099	EPHX1	Epoxide hydrolase 1 - Homo sapiens (Human)	15	10	7	0.9	0.9	0.9	10.6667	0.9	0.084375	0.000133725
HYOU1_HUMAN	HYOU1_HUMAN	Q9Y4L1	HYOU1	Hypoxia up-regulated protein 1 precursor - Homo sapiens (Human)	14	9	9	89	87	108	10.6667	94.6667	8.875	0
IDH3A_HUMAN	IDH3A_HUMAN	P50213	IDH3A	Isocitrate dehydrogenase [NAD] subunit alpha, mitochondrial precursor - Homo sapiens (Human)	7	8	6	35	22	24	7	27	3.85714	6.46583e-05
IDH3B_HUMAN	IDH3B_HUMAN	O43837	IDH3B	Isocitrate dehydrogenase [NAD] subunit beta, mitochondrial precursor - Homo sapiens (Human)	3	2	4	17	8	14	3	13	4.33333	0.000332109
IF2B2_HUMAN	IF2B2_HUMAN	Q9Y6M1	IGF2BP2	Insulin-like growth factor 2 mRNA-binding protein 2 - Homo sapiens (Human)	1	1	0.9	10	9	8	0.666667	9	13.5	0.000249816
IF5A1_HUMAN	IF5A1_HUMAN	P63241	EIF5A	Eukaryotic translation initiation factor 5A-1 - Homo sapiens (Human)	1	5	1	36	32	27	2.33333	31.6667	13.5714	5.87803e-06
ILEU_HUMAN	ILEU_HUMAN	P30740	SERPINB1	Leukocyte elastase inhibitor - Homo sapiens (Human)	7	3	3	14	18	18	4.33333	16.6667	3.84615	0.000236591
ILF2_HUMAN	ILF2_HUMAN	Q12905	ILF2	Interleukin enhancer-binding factor 2 - Homo sapiens (Human)	7	6	4	18	13	14	5.66667	15	2.64706	0.000953711
IMDH2_HUMAN	IMDH2_HUMAN	P12268	IMPDH2	Inosine-5'-monophosphate dehydrogenase 2 - Homo sapiens (Human)	2	2	3	32	21	27	2.33333	26.6667	11.4286	1.46951e-05
IMMT_HUMAN	IMMT_HUMAN	Q16891	IMMT	Mitochondrial inner membrane protein - Homo sapiens (Human)	8	9	7	30	17	22	8	23	2.875	0.000258633
IPO4_HUMAN	IPO4_HUMAN	Q8TEX9	IPO4	Importin-4 - Homo sapiens (Human)	0.9	0.9	0.9	9	8	8	0.9	8.33333	9.25926	0.000326231
IPO7_HUMAN	IPO7_HUMAN	O95373	IPO7	Importin-7 - Homo sapiens (Human)	3	3	2	17	20	21	2.66667	19.3333	7.25	5.14328e-05
ISOC2_HUMAN	ISOC2_HUMAN	Q96AB3	ISOC2	Isochorismatase domain-containing protein 2, mitochondrial precursor - Homo sapiens (Human)	0.9	0.9	0.9	8	6	7	0.9	7	7.77778	0.000590742
K1C10_HUMAN	K1C10_HUMAN	P13645	KRT10	Keratin, type I cytoskeletal 10 - Homo sapiens (Human)	82	82	79	0.9	0.9	0.9	81	0.9	0.0111111	0
K1C9_HUMAN	K1C9_HUMAN	P35527	KRT9	Keratin, type I cytoskeletal 9 - Homo sapiens (Human)	41	49	59	0.9	0.9	0.9	49.6667	0.9	0.0181208	0
K22E_HUMAN	K22E_HUMAN	P35908	KRT2	Keratin, type II cytoskeletal 2 epidermal - Homo sapiens (Human)	53	51	61	0.9	0.9	0.9	55	0.9	0.0163636	0
K2C1_HUMAN	K2C1_HUMAN	P04264	KRT1	Keratin, type II cytoskeletal 1 - Homo sapiens (Human)	96	83	82	0.9	0.9	0.9	87	0.9	0.0103448	0
K2C5_HUMAN	K2C5_HUMAN	P13647	KRT5	Keratin, type II cytoskeletal 5 - Homo sapiens (Human)	7	6	11	0.9	0.9	0.9	8	0.9	0.1125	0.000362968
KAD2_HUMAN	KAD2_HUMAN	P54819	AK2	Adenylate kinase isoenzyme 2, mitochondrial - Homo sapiens (Human)	5	0.9	6	22	24	13	3.66667	19.6667	5.36364	8.81705e-05
KPYM_HUMAN	KPYM_HUMAN	P14618	PKM2	Pyruvate kinase isozymes M1/M2 - Homo sapiens (Human)	65	86	74	195	207	237	75	213	2.84	0
KRT81_HUMAN	KRT81_HUMAN	Q14533	KRT81	Keratin type II cuticular Hb1 - Homo sapiens (Human)	16	17	15	0.9	0.9	0.9	16	0.9	0.05625	3.67377e-05
KTN1_HUMAN	KTN1_HUMAN	Q86UP2	KTN1	Kinectin - Homo sapiens (Human)	14	15	20	6	3	4	16.3333	4.33333	0.265306	0.000248347
KU70_HUMAN	KU70_HUMAN	P12956	XRCC6	ATP-dependent DNA helicase 2 subunit 1 - Homo sapiens (Human)	10	16	10	43	36	47	12	42	3.5	3.37987e-05
LAT1_HUMAN	LAT1_HUMAN	Q01650	SLC7A5	Large neutral amino acids transporter small subunit 1 - Homo sapiens (Human)	7	8	6	0.9	0.9	0.9	7	0.9	0.128571	0.000584864
LDHA_HUMAN	LDHA_HUMAN	P00338	LDHA	L-lactate dehydrogenase A chain - Homo sapiens (Human)	22	14	11	49	59	35	15.6667	47.6667	3.04255	4.11462e-05
LDHB_HUMAN	LDHB_HUMAN	P07195	LDHB	L-lactate dehydrogenase B chain - Homo sapiens (Human)	18	20	20	48	76	41	19.3333	55	2.84483	3.37987e-05
LEG1_HUMAN	LEG1_HUMAN	P09382	LGALS1	Galectin-1 - Homo sapiens (Human)	9	11	16	55	54	42	12	50.3333	4.19444	1.46951e-05
LETM1_HUMAN	LETM1_HUMAN	O95202	LETM1	Leucine zipper-EF-hand-containing transmembrane protein 1, mitochondrial precursor - Homo sapiens (Human)	5	3	1	16	9	10	3	11.6667	3.88889	0.00050845
LG3BP_HUMAN	LG3BP_HUMAN	Q08380	LGALS3BP	Galectin-3-binding protein precursor - Homo sapiens (Human)	5	7	2	33	36	24	4.66667	31	6.64286	1.91036e-05
LMAN1_HUMAN	LMAN1_HUMAN	P49257	LMAN1	Protein ERGIC-53 precursor - Homo sapiens (Human)	0.9	0.9	0.9	12	17	14	0.9	14.3333	15.9259	4.84938e-05
LMAN2_HUMAN	LMAN2_HUMAN	Q12907	LMAN2	Vesicular integral-membrane protein VIP36 precursor - Homo sapiens (Human)	2	2	1	12	7	8	1.66667	9	5.4	0.000468773
LMNA_HUMAN	LMNA_HUMAN	P02545	LMNA	Lamin-A/C - Homo sapiens (Human)	97	99	81	125	155	118	92.3333	132.667	1.43682	0.000265981
LONM_HUMAN	LONM_HUMAN	P36776	LONP1	Lon protease homolog, mitochondrial precursor - Homo sapiens (Human)	8	5	9	43	45	44	7.33333	44	6	5.87803e-06
LPPRC_HUMAN	LPPRC_HUMAN	P42704	LRPPRC	Leucine-rich PPR motif-containing protein, mitochondrial precursor - Homo sapiens (Human)	20	25	21	43	55	64	22	54	2.45455	5.87803e-05
LRC59_HUMAN	LRC59_HUMAN	Q96AG4	LRRC59	Leucine-rich repeat-containing protein 59 - Homo sapiens (Human)	1	3	7	14	12	10	3.66667	12	3.27273	0.000833211
MACF1_HUMAN	MACF1_HUMAN	Q9UPN3	MACF1	Microtubule-actin cross-linking factor 1, isoforms 1/2/3/5 - Homo sapiens (Human)	3	1	1	15	11	11	1.66667	12.3333	7.4	0.000173402
MAOM_HUMAN	MAOM_HUMAN	P23368	ME2	NAD-dependent malic enzyme, mitochondrial precursor - Homo sapiens (Human)	2	0.9	1	11	7	12	1	10	10	0.000248347
MAP4_HUMAN	MAP4_HUMAN	P27816	MAP4	Microtubule-associated protein 4 - Homo sapiens (Human)	15	14	5	32	30	46	11.3333	36	3.17647	6.17193e-05
MARCS_HUMAN	MARCS_HUMAN	P29966	MARCKS	Myristoylated alanine-rich C-kinase substrate - Homo sapiens (Human)	17	12	10	4	1	7	13	4	0.307692	0.000630419
MBB1A_HUMAN	MBB1A_HUMAN	Q9BQG0	MYBBP1A	Myb-binding protein 1A - Homo sapiens (Human)	1	0.9	2	10	14	10	1	11.3333	11.3333	0.000174871
MCCC2_HUMAN	MCCB_HUMAN	Q9HCC0	MCCC2	Methylcrotonoyl-CoA carboxylase beta chain, mitochondrial precursor - Homo sapiens (Human)	0.9	0.9	0.9	11	10	10	0.9	10.3333	11.4815	0.000174871
MDC1_HUMAN	MDC1_HUMAN	Q14676	MDC1	Mediator of DNA damage checkpoint protein 1 - Homo sapiens (Human)	0.9	0.9	0.9	9	7	6	0.9	7.33333	8.14815	0.00047759
MDHM_HUMAN	MDHM_HUMAN	P40926	MDH2	Malate dehydrogenase, mitochondrial precursor - Homo sapiens (Human)	11	15	13	59	50	42	13	50.3333	3.87179	1.91036e-05
MFGM_HUMAN	MFGM_HUMAN	Q08431	MFGE8	Lactadherin precursor - Homo sapiens (Human)	0.9	0.9	0.9	20	27	17	0.9	21.3333	23.7037	1.46951e-05
MIF_HUMAN	MIF_HUMAN	P14174	MIF	Macrophage migration inhibitory factor - Homo sapiens (Human)	0.9	0.9	0.9	34	40	30	0.9	34.6667	38.5185	0
MPCP_HUMAN	MPCP_HUMAN	Q00325	SLC25A3	Phosphate carrier protein, mitochondrial precursor - Homo sapiens (Human)	15	10	15	0.9	0.9	0.9	13.3333	0.9	0.0675	6.46583e-05
MYH9_HUMAN	MYH9_HUMAN	P35579	MYH9	Myosin-9 - Homo sapiens (Human)	71	84	75	166	142	168	76.6667	158.667	2.06957	5.87803e-06
MYO1D_HUMAN	MYO1D_HUMAN	O94832	MYO1D	Myosin-Id - Homo sapiens (Human)	18	19	17	0.9	0.9	0.9	18	0.9	0.05	1.91036e-05
MYO5A_HUMAN	MYO5A_HUMAN	Q9Y4I1	MYO5A	Myosin-Va - Homo sapiens (Human)	28	25	26	0.9	0.9	0.9	26.3333	0.9	0.0341772	1.46951e-06
MYOF_HUMAN	MYOF_HUMAN	Q9NZM1	MYOF	Myoferlin - Homo sapiens (Human)	16	13	18	4	1	8	15.6667	4.33333	0.276596	0.00029831
NAMPT_HUMAN	NAMPT_HUMAN	P43490	NAMPT	Nicotinamide phosphoribosyltransferase - Homo sapiens (Human)	2	2	5	26	17	19	3	20.6667	6.88889	4.84938e-05
NCPR_HUMAN	NCPR_HUMAN	P16435	POR	NADPH--cytochrome P450 reductase - Homo sapiens (Human)	6	6	10	0.9	1	1	7.33333	0.666667	0.0909091	0.000454078
NDK8_HUMAN	NDK8_HUMAN	O60361	NME2P1	Putative nucleoside diphosphate kinase - Homo sapiens (Human)	6	5	6	24	18	23	5.66667	21.6667	3.82353	0.000144012
NDKA_HUMAN	NDKA_HUMAN	P15531	NME1	Nucleoside diphosphate kinase A - Homo sapiens (Human)	8	7	6	19	23	23	7	21.6667	3.09524	0.000235121
NNTM_HUMAN	NNTM_HUMAN	Q13423	NNT	NAD(P) transhydrogenase, mitochondrial precursor - Homo sapiens (Human)	12	7	9	0.9	0.9	0.9	9.33333	0.9	0.0964286	0.000221896
NOL5_HUMAN	NOP58_HUMAN	Q9Y2X3	NOP58	Nucleolar protein 5 - Homo sapiens (Human)	3	0.9	5	12	15	15	2.66667	14	5.25	0.000236591
NOL5A_HUMAN	NOP56_HUMAN	O00567	NOP56	Nucleolar protein 5A - Homo sapiens (Human)	6	4	3	15	18	14	4.33333	15.6667	3.61538	0.000320353
NPM_HUMAN	NPM_HUMAN	P06748	NPM1	Nucleophosmin - Homo sapiens (Human)	14	22	33	96	108	92	23	98.6667	4.28986	0
NQO1_HUMAN	NQO1_HUMAN	P15559	NQO1	NAD(P)H dehydrogenase [quinone] 1 - Homo sapiens (Human)	11	11	12	0.9	0.9	0.9	11.3333	0.9	0.0794118	0.000101396
NUCL_HUMAN	NUCL_HUMAN	P19338	NCL	Nucleolin - Homo sapiens (Human)	20	13	19	72	93	64	17.3333	76.3333	4.40385	1.46951e-06
NUMA1_HUMAN	NUMA1_HUMAN	Q14980	NUMA1	Nuclear mitotic apparatus protein 1 - Homo sapiens (Human)	4	6	4	16	9	18	4.66667	14.3333	3.07143	0.00065687
O94935_HUMAN	SAC1_HUMAN	Q9NTJ5	SACM1L	SAC1 suppressor of actin mutations 1-like protein - Homo sapiens (Human)	5	7	9	1	1	1	7	1	0.142857	0.000584864
OAT_HUMAN	OAT_HUMAN	P04181	OAT	Ornithine aminotransferase, mitochondrial precursor - Homo sapiens (Human)	6	5	8	19	19	18	6.33333	18.6667	2.94737	0.00038942
ODP2_HUMAN	ODP2_HUMAN	P10515	DLAT	Dihydrolipoyllysine-residue acetyltransferase component of pyruvate dehydrogenase complex, mitochondrial precursor - Homo sapiens (Human)	1	1	2	11	7	10	1.33333	9.33333	7	0.000320353
OLA1_HUMAN	OLA1_HUMAN	Q9NTK5	OLA1	Obg-like ATPase 1 - Homo sapiens (Human)	2	4	5	12	16	9	3.66667	12.3333	3.36364	0.00071565
OPA1_HUMAN	OPA1_HUMAN	O60313	OPA1	Dynamin-like 120 kDa protein, mitochondrial precursor - Homo sapiens (Human)	2	1	3	17	14	9	2	13.3333	6.66667	0.000154298
OST48_HUMAN	OST48_HUMAN	P39656	DDOST	Dolichyl-diphosphooligosaccharide--protein glycosyltransferase 48 kDa subunit precursor - Homo sapiens (Human)	4	5	4	15	14	19	4.33333	16	3.69231	0.000292432
P4HA1_HUMAN	P4HA1_HUMAN	P13674	P4HA1	Prolyl 4-hydroxylase subunit alpha-1 precursor - Homo sapiens (Human)	2	1	0.9	17	5	6	1	9.33333	9.33333	0.000320353
PARK7_HUMAN	PARK7_HUMAN	Q99497	PARK7	Protein DJ-1 - Homo sapiens (Human)	7	7	5	17	16	15	6.33333	16	2.52632	0.000971345
PDC6I_HUMAN	PDC6I_HUMAN	Q8WUM4	PDCD6IP	Programmed cell death 6-interacting protein - Homo sapiens (Human)	2	7	4	15	15	14	4.33333	14.6667	3.38462	0.0004482
PDCD6_HUMAN	PDCD6_HUMAN	O75340	PDCD6	Programmed cell death protein 6 - Homo sapiens (Human)	0.9	0.9	0.9	9	6	4	0.9	6.33333	7.03704	0.00092432
PDIA1_HUMAN	PDIA1_HUMAN	P07237	P4HB	Protein disulfide-isomerase precursor - Homo sapiens (Human)	15	13	12	148	95	110	13.3333	117.667	8.825	0
PDIA3_HUMAN	PDIA3_HUMAN	P30101	PDIA3	Protein disulfide-isomerase A3 precursor - Homo sapiens (Human)	26	21	19	73	70	78	22	73.6667	3.34848	5.87803e-06
PDIA4_HUMAN	PDIA4_HUMAN	P13667	PDIA4	Protein disulfide-isomerase A4 precursor - Homo sapiens (Human)	4	4	5	80	63	103	4.33333	82	18.9231	0
PDIA5_HUMAN	PDIA5_HUMAN	Q14554	PDIA5	Protein disulfide-isomerase A5 precursor - Homo sapiens (Human)	0.9	0.9	0.9	8	9	8	0.9	8.33333	9.25926	0.000326231
PDIA6_HUMAN	PDIA6_HUMAN	Q15084	PDIA6	Protein disulfide-isomerase A6 precursor - Homo sapiens (Human)	15	4	9	57	74	70	9.33333	67	7.17857	0
PDXK_HUMAN	PDXK_HUMAN	O00764	PDXK	Pyridoxal kinase - Homo sapiens (Human)	0.9	3	0.9	5	9	13	1	9	9	0.000468773
PGK1_HUMAN	PGK1_HUMAN	P00558	PGK1	Phosphoglycerate kinase 1 - Homo sapiens (Human)	23	29	33	47	55	48	28.3333	50	1.76471	0.000409993
PGM1_HUMAN	PGM1_HUMAN	P36871	PGM1	Phosphoglucomutase-1 - Homo sapiens (Human)	1	5	6	23	17	12	4	17.3333	4.33333	0.000182219
PHB2_HUMAN	PHB2_HUMAN	Q99623	PHB2	Prohibitin-2 - Homo sapiens (Human)	8	11	13	28	25	26	10.6667	26.3333	2.46875	0.000320353
PLOD1_HUMAN	PLOD1_HUMAN	Q02809	PLOD1	Procollagen-lysine,2-oxoglutarate 5-dioxygenase 1 precursor - Homo sapiens (Human)	2	2	2	10	10	10	2	10	5	0.0004482
PLOD3_HUMAN	PLOD3_HUMAN	O60568	PLOD3	Procollagen-lysine,2-oxoglutarate 5-dioxygenase 3 precursor - Homo sapiens (Human)	1	1	2	13	11	9	1.33333	11	8.25	0.000182219
PLSL_HUMAN	PLSL_HUMAN	P13796	LCP1	Plastin-2 - Homo sapiens (Human)	4	1	1	22	20	17	2	19.6667	9.83333	3.82072e-05
PNPH_HUMAN	PNPH_HUMAN	P00491	NP	Purine nucleoside phosphorylase - Homo sapiens (Human)	9	11	8	3	3	0.9	9.33333	2	0.214286	0.000787656
PP1R7_HUMAN	PP1R7_HUMAN	Q15435	PPP1R7	Protein phosphatase 1 regulatory subunit 7 - Homo sapiens (Human)	1	2	2	11	13	8	1.66667	10.6667	6.4	0.00026892
PPAC_HUMAN	PPAC_HUMAN	P24666	ACP1	Low molecular weight phosphotyrosine protein phosphatase - Homo sapiens (Human)	2	2	0.9	7	7	10	1.33333	8	6	0.000843497
PPCKM_HUMAN	PCKGM_HUMAN	Q16822	PCK2	Phosphoenolpyruvate carboxykinase [GTP], mitochondrial precursor - Homo sapiens (Human)	2	1	2	10	9	6	1.66667	8.33333	5	0.000727406
PPIA_HUMAN	PPIA_HUMAN	P62937	PPIA	Peptidyl-prolyl cis-trans isomerase A - Homo sapiens (Human)	15	13	8	41	37	35	12	37.6667	3.13889	5.87803e-05
PPIB_HUMAN	PPIB_HUMAN	P23284	PPIB	Peptidyl-prolyl cis-trans isomerase B precursor - Homo sapiens (Human)	16	20	15	63	58	78	17	66.3333	3.90196	5.87803e-06
PRDX1_HUMAN	PRDX1_HUMAN	Q06830	PRDX1	Peroxiredoxin-1 - Homo sapiens (Human)	24	14	20	37	47	53	19.3333	45.6667	2.36207	9.99265e-05
PRDX4_HUMAN	PRDX4_HUMAN	Q13162	PRDX4	Peroxiredoxin-4 - Homo sapiens (Human)	3	1	1	10	14	7	1.66667	10.3333	6.2	0.00029978
PRDX5_HUMAN	PRDX5_HUMAN	P30044	PRDX5	Peroxiredoxin-5, mitochondrial precursor - Homo sapiens (Human)	3	6	8	32	36	33	5.66667	33.6667	5.94118	1.91036e-05
PRDX6_HUMAN	PRDX6_HUMAN	P30041	PRDX6	Peroxiredoxin-6 - Homo sapiens (Human)	6	1	2	22	21	13	3	18.6667	6.22222	6.46583e-05
PROF1_HUMAN	PROF1_HUMAN	P07737	PFN1	Profilin-1 - Homo sapiens (Human)	21	19	20	51	55	51	20	52.3333	2.61667	4.84938e-05
PRP8_HUMAN	PRP8_HUMAN	Q6P2Q9	PRPF8	Pre-mRNA-processing-splicing factor 8 - Homo sapiens (Human)	12	11	3	0.9	0.9	0.9	8.66667	0.9	0.103846	0.000274798
PSB5_HUMAN	PSB5_HUMAN	P28074	PSMB5	Proteasome subunit beta type-5 precursor - Homo sapiens (Human)	12	8	12	3	1	5	10.6667	3	0.28125	0.000734754
PSB8_HUMAN	PSB8_HUMAN	P28062	PSMB8	Proteasome subunit beta type-8 precursor - Homo sapiens (Human)	0.9	0.9	2	19	6	4	0.666667	9.66667	14.5	0.000280676
PSDE_HUMAN	PSDE_HUMAN	O00487	PSMD14	26S proteasome non-ATPase regulatory subunit 14 - Homo sapiens (Human)	0.9	0.9	0.9	7	4	8	0.9	6.33333	7.03704	0.00092432
PTBP1_HUMAN	PTBP1_HUMAN	P26599	PTBP1	Polypyrimidine tract-binding protein 1 - Homo sapiens (Human)	15	8	10	28	25	22	11	25	2.27273	0.000468773
PUR9_HUMAN	PUR9_HUMAN	P31939	ATIC	Bifunctional purine biosynthesis protein PURH [Includes: Phosphoribosylaminoimidazolecarboxamide formyltransferase - Homo sapiens (Human)	9	12	11	32	42	30	10.6667	34.6667	3.25	6.17193e-05
PYGB_HUMAN	PYGB_HUMAN	P11216	PYGB	Glycogen phosphorylase, brain form - Homo sapiens (Human)	21	17	13	123	95	103	17	107	6.29412	0
PYGL_HUMAN	PYGL_HUMAN	P06737	PYGL	Glycogen phosphorylase, liver form - Homo sapiens (Human)	11	12	6	0.9	0.9	0.9	9.66667	0.9	0.0931034	0.000168993
PYRG1_HUMAN	PYRG1_HUMAN	P17812	CTPS	CTP synthase 1 - Homo sapiens (Human)	0.9	0.9	0.9	7	8	5	0.9	6.66667	7.40741	0.000768553
QOR_HUMAN	QOR_HUMAN	Q08257	CRYZ	Quinone oxidoreductase - Homo sapiens (Human)	9	5	6	0.9	0.9	0.9	6.66667	0.9	0.135	0.000705364
RAB14_HUMAN	RAB14_HUMAN	P61106	RAB14	Ras-related protein Rab-14 - Homo sapiens (Human)	8	10	6	0.9	0.9	0.9	8	0.9	0.1125	0.000362968
RAB32_HUMAN	RAB32_HUMAN	Q13637	RAB32	Ras-related protein Rab-32 - Homo sapiens (Human)	15	10	7	3	1	2	10.6667	2	0.1875	0.000332109
RALY_HUMAN	RALY_HUMAN	Q9UKM9	RALY	RNA-binding protein Raly - Homo sapiens (Human)	24	8	9	5	3	2	13.6667	3.33333	0.243902	0.000313005
RCN1_HUMAN	RCN1_HUMAN	Q15293	RCN1	Reticulocalbin-1 precursor - Homo sapiens (Human)	6	2	3	20	17	30	3.66667	22.3333	6.09091	4.84938e-05
RETST_HUMAN	RETST_HUMAN	Q6NUM9	RETSAT	All-trans-retinol 13,14-reductase precursor - Homo sapiens (Human)	8	5	9	2	1	1	7.33333	1.33333	0.181818	0.000731815
RIB1_HUMAN	RPN1_HUMAN	P04843	RPN1	Dolichyl-diphosphooligosaccharide--protein glycosyltransferase 67 kDa subunit precursor - Homo sapiens (Human)	13	18	15	41	39	40	15.3333	40	2.6087	8.81705e-05
RL19_HUMAN	RL19_HUMAN	P84098	RPL19	60S ribosomal protein L19 - Homo sapiens (Human)	0.9	0.9	0.9	3	5	24	0.9	10.6667	11.8519	0.00014842
RL1D1_HUMAN	RL1D1_HUMAN	O76021	RSL1D1	Ribosomal L1 domain-containing protein 1 - Homo sapiens (Human)	0.9	0.9	0.9	13	15	11	0.9	13	14.4444	6.46583e-05
RL23_HUMAN	RL23_HUMAN	P62829	RPL23	60S ribosomal protein L23 - Homo sapiens (Human)	2	3	4	12	10	9	3	10.3333	3.44444	0.00098604
RL23A_HUMAN	RL23A_HUMAN	P62750	RPL23A	60S ribosomal protein L23a - Homo sapiens (Human)	3	1	3	10	15	10	2.33333	11.6667	5	0.000320353
RL6_HUMAN	RL6_HUMAN	Q02878	RPL6	60S ribosomal protein L6 - Homo sapiens (Human)	11	8	7	14	23	24	8.66667	20.3333	2.34615	0.00074504
RL9_HUMAN	RL9_HUMAN	P32969	RPL9	60S ribosomal protein L9 - Homo sapiens (Human)	1	3	1	11	10	8	1.66667	9.66667	5.8	0.00038942
ROA1_HUMAN	ROA1_HUMAN	P09651	HNRNPA1	Heterogeneous nuclear ribonucleoprotein A1 - Homo sapiens (Human)	8	10	8	18	26	24	8.66667	22.6667	2.61538	0.00035856
ROAA_HUMAN	ROAA_HUMAN	Q99729	HNRNPAB	Heterogeneous nuclear ribonucleoprotein A/B - Homo sapiens (Human)	3	1	1	10	8	8	1.66667	8.66667	5.2	0.00053784
RRBP1_HUMAN	RRBP1_HUMAN	Q9P2E9	RRBP1	Ribosome-binding protein 1 - Homo sapiens (Human)	10	13	14	40	42	32	12.3333	38	3.08108	6.17193e-05
RS15_HUMAN	RS15_HUMAN	P62841	RPS15	40S ribosomal protein S15 - Homo sapiens (Human)	0.9	0.9	0.9	12	17	13	0.9	14	15.5556	5.58413e-05
RS15A_HUMAN	RS15A_HUMAN	P62244	RPS15A	40S ribosomal protein S15a - Homo sapiens (Human)	0.9	3	3	8	12	8	2	9.33333	4.66667	0.000887583
RS16_HUMAN	RS16_HUMAN	P62249	RPS16	40S ribosomal protein S16 - Homo sapiens (Human)	6	10	4	21	16	14	6.66667	17	2.55	0.000831741
RS25_HUMAN	RS25_HUMAN	P62851	RPS25	40S ribosomal protein S25 - Homo sapiens (Human)	2	1	0.9	6	11	11	1	9.33333	9.33333	0.000320353
RS3A_HUMAN	RS3A_HUMAN	P61247	RPS3A	40S ribosomal protein S3a - Homo sapiens (Human)	1	5	3	16	16	2	3	11.3333	3.77778	0.000580456
RS7_HUMAN	RS7_HUMAN	P62081	RPS7	40S ribosomal protein S7 - Homo sapiens (Human)	2	2	3	15	11	9	2.33333	11.6667	5	0.000320353
RUVB2_HUMAN	RUVB2_HUMAN	Q9Y230	RUVBL2	RuvB-like 2 - Homo sapiens (Human)	10	3	9	25	16	22	7.33333	21	2.86364	0.000320353
S100B_HUMAN	S100B_HUMAN	P04271	S100B	Protein S100-B - Homo sapiens (Human)	0.9	0.9	0.9	20	21	14	0.9	18.3333	20.3704	1.91036e-05
S10A1_HUMAN	S10A1_HUMAN	P23297	S100A1	Protein S100-A1 - Homo sapiens (Human)	0.9	0.9	0.9	9	8	7	0.9	8	8.88889	0.000371785
S10A6_HUMAN	S10A6_HUMAN	P06703	S100A6	Protein S100-A6 - Homo sapiens (Human)	6	19	8	0.9	0.9	0.9	11	0.9	0.0818182	0.0001205
SAP_HUMAN	SAP_HUMAN	P07602	PSAP	Proactivator polypeptide precursor [Contains: Saposin-A - Homo sapiens (Human)	2	2	2	14	15	20	2	16.3333	8.16667	6.17193e-05
SAR1A_HUMAN	SAR1A_HUMAN	Q9NR31	SAR1A	GTP-binding protein SAR1a - Homo sapiens (Human)	1	3	5	13	18	11	3	14	4.66667	0.000236591
SATT_HUMAN	SATT_HUMAN	P43007	SLC1A4	Neutral amino acid transporter A - Homo sapiens (Human)	13	11	13	3	4	2	12.3333	3	0.243243	0.000402645
SC31A_HUMAN	SC31A_HUMAN	O94979	SEC31A	Protein transport protein Sec31A - Homo sapiens (Human)	3	2	5	21	19	19	3.33333	19.6667	5.9	6.17193e-05
SF3B3_HUMAN	SF3B3_HUMAN	Q15393	SF3B3	Splicing factor 3B subunit 3 - Homo sapiens (Human)	7	11	6	0.9	0.9	0.9	8	0.9	0.1125	0.000362968
SFXN1_HUMAN	SFXN1_HUMAN	Q9H9B4	SFXN1	Sideroflexin-1 - Homo sapiens (Human)	3	2	3	17	22	14	2.66667	17.6667	6.625	6.46583e-05
SMD1_HUMAN	SMD1_HUMAN	P62314	SNRPD1	Small nuclear ribonucleoprotein Sm D1 - Homo sapiens (Human)	2	2	2	11	9	6	2	8.66667	4.33333	0.000850845
SND1_HUMAN	SND1_HUMAN	Q7KZF4	SND1	Staphylococcal nuclease domain-containing protein 1 - Homo sapiens (Human)	18	24	18	37	42	53	20	44	2.2	0.00017781
SNX2_HUMAN	SNX2_HUMAN	O60749	SNX2	Sorting nexin-2 - Homo sapiens (Human)	2	1	1	10	3	9	1.33333	7.33333	5.5	0.000839089
SNX9_HUMAN	SNX9_HUMAN	Q9Y5X1	SNX9	Sorting nexin-9 - Homo sapiens (Human)	2	4	5	24	23	26	3.66667	24.3333	6.63636	3.82072e-05
SODM_HUMAN	SODM_HUMAN	P04179	SOD2	Superoxide dismutase [Mn], mitochondrial precursor - Homo sapiens (Human)	6	6	6	18	23	18	6	19.6667	3.27778	0.000248347
SORT_HUMAN	SORT_HUMAN	Q99523	SORT1	Sortilin precursor - Homo sapiens (Human)	5	8	6	0.9	0.9	0.9	6.33333	0.9	0.142105	0.000824394
SPB6_HUMAN	SPB6_HUMAN	P35237	SERPINB6	Serpin B6 - Homo sapiens (Human)	7	7	11	47	33	37	8.33333	39	4.68	1.91036e-05
SPRE_HUMAN	SPRE_HUMAN	P35270	SPR	Sepiapterin reductase - Homo sapiens (Human)	2	0.9	2	10	9	6	1.33333	8.33333	6.25	0.000727406
SSRA_HUMAN	SSRA_HUMAN	P43307	SSR1	Translocon-associated protein subunit alpha precursor - Homo sapiens (Human)	3	2	2	13	11	9	2.33333	11	4.71429	0.000396767
STAT1_HUMAN	STAT1_HUMAN	P42224	STAT1	Signal transducer and activator of transcription 1-alpha/beta - Homo sapiens (Human)	2	0.9	0.9	32	19	20	0.666667	23.6667	35.5	1.46951e-05
STIP1_HUMAN	STIP1_HUMAN	P31948	STIP1	Stress-induced-phosphoprotein 1 - Homo sapiens (Human)	8	7	9	31	30	21	8	27.3333	3.41667	9.11095e-05
STOM_HUMAN	STOM_HUMAN	P27105	STOM	Erythrocyte band 7 integral membrane protein - Homo sapiens (Human)	19	13	14	3	8	5	15.3333	5.33333	0.347826	0.000624541
SYAC_HUMAN	SYAC_HUMAN	P49588	AARS	Alanyl-tRNA synthetase, cytoplasmic - Homo sapiens (Human)	4	11	7	36	30	32	7.33333	32.6667	4.45455	3.82072e-05
SYCC_HUMAN	SYCC_HUMAN	P49589	CARS	Cysteinyl-tRNA synthetase, cytoplasmic - Homo sapiens (Human)	1	3	0.9	14	6	6	1.33333	8.66667	6.5	0.00053784
SYDC_HUMAN	SYDC_HUMAN	P14868	DARS	Aspartyl-tRNA synthetase, cytoplasmic - Homo sapiens (Human)	9	10	9	2	3	1	9.33333	2	0.214286	0.000549596
SYEP_HUMAN	SYEP_HUMAN	P07814	EPRS	Bifunctional aminoacyl-tRNA synthetase [Includes: Glutamyl-tRNA synthetase - Homo sapiens (Human)	12	10	12	25	24	24	11.3333	24.3333	2.14706	0.000727406
SYFB_HUMAN	SYFB_HUMAN	Q9NSD9	FARSB	Phenylalanyl-tRNA synthetase beta chain - Homo sapiens (Human)	2	1	0.9	9	10	11	1	10	10	0.000248347
SYG_HUMAN	SYG_HUMAN	P41250	GARS	Glycyl-tRNA synthetase - Homo sapiens (Human)	4	6	7	35	26	32	5.66667	31	5.47059	2.20426e-05
SYRC_HUMAN	SYRC_HUMAN	P54136	RARS	Arginyl-tRNA synthetase, cytoplasmic - Homo sapiens (Human)	7	10	7	25	22	27	8	24.6667	3.08333	0.000182219
SYTC_HUMAN	SYTC_HUMAN	P26639	TARS	Threonyl-tRNA synthetase, cytoplasmic - Homo sapiens (Human)	7	6	4	22	17	14	5.66667	17.6667	3.11765	0.00035856
SYWC_HUMAN	SYWC_HUMAN	P23381	WARS	Tryptophanyl-tRNA synthetase, cytoplasmic - Homo sapiens (Human)	9	11	6	48	38	39	8.66667	41.6667	4.80769	1.91036e-05
SYYC_HUMAN	SYYC_HUMAN	P54577	YARS	Tyrosyl-tRNA synthetase, cytoplasmic - Homo sapiens (Human)	7	4	4	20	21	31	5	24	4.8	6.17193e-05
TALDO_HUMAN	TALDO_HUMAN	P37837	TALDO1	Transaldolase - Homo sapiens (Human)	6	7	4	24	24	22	5.66667	23.3333	4.11765	8.81705e-05
TB182_HUMAN	TB182_HUMAN	Q9C0C2	TNKS1BP1	182 kDa tankyrase 1-binding protein - Homo sapiens (Human)	0.9	0.9	0.9	9	4	8	0.9	7	7.77778	0.000590742
TBA1A_HUMAN	TBA1A_HUMAN	Q71U36	TUBA1A	Tubulin alpha-1A chain - Homo sapiens (Human)	52	57	62	157	167	129	57	151	2.64912	0
TBB2A_HUMAN	TBB2A_HUMAN	Q13885	TUBB2A	Tubulin beta-2A chain - Homo sapiens (Human)	74	60	63	135	122	137	65.6667	131.333	2	1.91036e-05
TBB5_HUMAN	TBB5_HUMAN	P07437	TUBB	Tubulin beta chain - Homo sapiens (Human)	15	30	24	52	41	97	23	63.3333	2.75362	2.20426e-05
TCP4_HUMAN	TCP4_HUMAN	P53999	SUB1	Activated RNA polymerase II transcriptional coactivator p15 - Homo sapiens (Human)	6	3	3	20	13	8	4	13.6667	3.41667	0.000470242
TCPB_HUMAN	TCPB_HUMAN	P78371	CCT2	T-complex protein 1 subunit beta - Homo sapiens (Human)	13	12	12	43	47	41	12.3333	43.6667	3.54054	2.49816e-05
TCPE_HUMAN	TCPE_HUMAN	P48643	CCT5	T-complex protein 1 subunit epsilon - Homo sapiens (Human)	5	8	5	19	19	18	6	18.6667	3.11111	0.000320353
TCPH_HUMAN	TCPH_HUMAN	Q99832	CCT7	T-complex protein 1 subunit eta - Homo sapiens (Human)	13	14	10	37	27	20	12.3333	28	2.27027	0.00038942
TCPQ_HUMAN	TCPQ_HUMAN	P50990	CCT8	T-complex protein 1 subunit theta - Homo sapiens (Human)	11	12	9	16	24	28	10.6667	22.6667	2.125	0.000897869
TCPZ_HUMAN	TCPZ_HUMAN	P40227	CCT6A	T-complex protein 1 subunit zeta - Homo sapiens (Human)	8	7	10	24	20	29	8.33333	24.3333	2.92	0.000196914
TCTP_HUMAN	TCTP_HUMAN	P13693	TPT1	Translationally-controlled tumor protein - Homo sapiens (Human)	3	2	2	12	10	12	2.33333	11.3333	4.85714	0.00035856
TERA_HUMAN	TERA_HUMAN	P55072	VCP	Transitional endoplasmic reticulum ATPase - Homo sapiens (Human)	17	15	17	60	55	41	16.3333	52	3.18367	2.20426e-05
THEM2_HUMAN	ACO13_HUMAN	Q9NPJ3	ACOT13	Thioesterase superfamily member 2 - Homo sapiens (Human)	4	1	2	10	13	8	2.33333	10.3333	4.42857	0.00050845
THIC_HUMAN	THIC_HUMAN	Q9BWD1	ACAT2	Acetyl-CoA acetyltransferase, cytosolic - Homo sapiens (Human)	5	6	4	14	17	12	5	14.3333	2.86667	0.000819985
THIK_HUMAN	THIK_HUMAN	P09110	ACAA1	3-ketoacyl-CoA thiolase, peroxisomal precursor - Homo sapiens (Human)	0.9	0.9	0.9	8	11	8	0.9	9	10	0.000249816
THIL_HUMAN	THIL_HUMAN	P24752	ACAT1	Acetyl-CoA acetyltransferase, mitochondrial precursor - Homo sapiens (Human)	11	11	14	23	27	41	12	30.3333	2.52778	0.000196914
TIMP3_HUMAN	TIMP3_HUMAN	P35625	TIMP3	Metalloproteinase inhibitor 3 precursor - Homo sapiens (Human)	0.9	0.9	0.9	9	8	8	0.9	8.33333	9.25926	0.000326231
TKT_HUMAN	TKT_HUMAN	P29401	TKT	Transketolase - Homo sapiens (Human)	28	35	31	89	90	84	31.3333	87.6667	2.79787	5.87803e-06
TLN1_HUMAN	TLN1_HUMAN	Q9Y490	TLN1	Talin-1 - Homo sapiens (Human)	75	77	75	120	117	128	75.6667	121.667	1.60793	9.99265e-05
TMEDA_HUMAN	TMEDA_HUMAN	P49755	TMED10	Transmembrane emp24 domain-containing protein 10 precursor - Homo sapiens (Human)	3	3	2	17	18	15	2.66667	16.6667	6.25	8.81705e-05
TMM43_HUMAN	TMM43_HUMAN	Q9BTV4	TMEM43	Transmembrane protein 43 - Homo sapiens (Human)	2	1	1	15	17	6	1.33333	12.6667	9.5	9.99265e-05
TNR16_HUMAN	TNR16_HUMAN	P08138	NGFR	Tumor necrosis factor receptor superfamily member 16 precursor - Homo sapiens (Human)	0.9	0.9	0.9	10	7	5	0.9	7.33333	8.14815	0.00047759
TPD54_HUMAN	TPD54_HUMAN	O43399	TPD52L2	Tumor protein D54 - Homo sapiens (Human)	2	0.9	1	7	11	6	1	8	8	0.000524614
TPIS_HUMAN	TPIS_HUMAN	P60174	TPI1	Triosephosphate isomerase - Homo sapiens (Human)	17	1	33	26	27	52	17	35	2.05882	0.000364438
TPM4_HUMAN	TPM4_HUMAN	P67936	TPM4	Tropomyosin alpha-4 chain - Homo sapiens (Human)	16	4	16	0.9	0.9	0.9	12	0.9	0.075	8.37619e-05
TPR_HUMAN	TPR_HUMAN	P12270	TPR	Nucleoprotein TPR - Homo sapiens (Human)	16	6	4	28	21	26	8.66667	25	2.88462	0.000196914
TRAP1_HUMAN	TRAP1_HUMAN	Q12931	TRAP1	Heat shock protein 75 kDa, mitochondrial precursor - Homo sapiens (Human)	2	0.9	1	25	17	24	1	22	22	1.91036e-05
TYRP1_HUMAN	TYRP1_HUMAN	P17643	TYRP1	5,6-dihydroxyindole-2-carboxylic acid oxidase precursor - Homo sapiens (Human)	24	25	39	15	14	7	29.3333	12	0.409091	0.000242469
UB2V1_HUMAN	UB2V1_HUMAN	Q13404	UBE2V1	Ubiquitin-conjugating enzyme E2 variant 1 - Homo sapiens (Human)	3	1	2	9	8	18	2	11.6667	5.83333	0.000248347
UBE1_HUMAN	UBA1_HUMAN	P22314	UBA1	Ubiquitin-activating enzyme E1 - Homo sapiens (Human)	28	27	14	71	63	75	23	69.6667	3.02899	1.46951e-05
UBE1L_HUMAN	UBA7_HUMAN	P41226	UBA7	Ubiquitin-activating enzyme E1 homolog - Homo sapiens (Human)	0.9	0.9	0.9	4	9	7	0.9	6.66667	7.40741	0.000768553
UBXD8_HUMAN	FAF2_HUMAN	Q96CS3	FAF2	UBX domain-containing protein 8 - Homo sapiens (Human)	1	1	0.9	6	5	8	0.666667	6.33333	9.5	0.00092432
UGGG1_HUMAN	UGGG1_HUMAN	Q9NYU2	UGCGL1	UDP-glucose:glycoprotein glucosyltransferase 1 precursor - Homo sapiens (Human)	7	8	12	34	31	35	9	33.3333	3.7037	4.84938e-05
VATA_HUMAN	VATA_HUMAN	P38606	ATP6V1A	Vacuolar ATP synthase catalytic subunit A - Homo sapiens (Human)	18	16	33	39	36	45	22.3333	40	1.79104	0.00065687
VDAC1_HUMAN	VDAC1_HUMAN	P21796	VDAC1	Voltage-dependent anion-selective channel protein 1 - Homo sapiens (Human)	22	25	20	62	81	63	22.3333	68.6667	3.07463	1.46951e-05
VIGLN_HUMAN	VIGLN_HUMAN	Q00341	HDLBP	Vigilin - Homo sapiens (Human)	7	6	5	18	17	20	6	18.3333	3.05556	0.00035856
VIME_HUMAN	VIME_HUMAN	P08670	VIM	Vimentin - Homo sapiens (Human)	99	122	113	45	30	48	111.333	41	0.368263	1.46951e-06
VINC_HUMAN	VINC_HUMAN	P18206	VCL	Vinculin - Homo sapiens (Human)	25	19	16	47	28	39	20	38	1.9	0.000461425
VP26A_HUMAN	VP26A_HUMAN	O75436	VPS26A	Vacuolar protein sorting-associated protein 26A - Homo sapiens (Human)	8	10	8	0.9	1	2	8.66667	1	0.115385	0.000402645
VPP1_HUMAN	VPP1_HUMAN	Q93050	ATP6V0A1	Vacuolar proton translocating ATPase 116 kDa subunit a isoform 1 - Homo sapiens (Human)	14	14	19	1	1	0.9	15.6667	0.666667	0.0425532	3.67377e-05
WDR1_HUMAN	WDR1_HUMAN	O75083	WDR1	WD repeat-containing protein 1 - Homo sapiens (Human)	14	17	19	4	5	6	16.6667	5	0.3	0.00032917
WDR61_HUMAN	WDR61_HUMAN	Q9GZS3	WDR61	WD repeat-containing protein 61 - Homo sapiens (Human)	1	1	2	8	12	2	1.33333	7.33333	5.5	0.000839089
XPO1_HUMAN	XPO1_HUMAN	O14980	XPO1	Exportin-1 - Homo sapiens (Human)	8	10	6	33	36	39	8	36	4.5	2.20426e-05
XPO2_HUMAN	XPO2_HUMAN	P55060	CSE1L	Exportin-2 - Homo sapiens (Human)	5	9	10	26	23	12	8	20.3333	2.54167	0.000480529

## Sheet: ctl_2c_DEP.001
2007_id	2009_id	accession	gene	desc	ctl-a	ctl-b	ctl-c	2c-a	2c-b	2c-c	mean(ctl)	mean(2c)	ratio(2c/ctl)	pValue		FDR =	1.19918	%
1433E_HUMAN	1433E_HUMAN	P62258	YWHAE	14-3-3 protein epsilon - Homo sapiens (Human)	28	26	22	19	12	1	25.3333	10.6667	0.421053	0.000366236
5NTD_HUMAN	5NTD_HUMAN	P21589	NT5E	5'-nucleotidase precursor - Homo sapiens (Human)	0.9	0.9	0.9	6	10	11	0.9	9	10	0.000230088
A6PWC0_HUMAN	N/A	A6PWC0	N/A	GTPase activating protein and VPS9 domains 1 - Homo sapiens (Human)	0.9	1	1	9	7	8	0.966667	8	8.27586	0.000337645
A7BFI3_HUMAN	PNCB_HUMAN	A7BFI3	NAPRT1	Nicotinic acid phosphoribosyltransferase - Homo sapiens (Human)	3	2	0.9	8	10	8	1.96667	8.66667	4.40678	0.00078693
AAAT_HUMAN	AAAT_HUMAN	Q15758	SLC1A5	Neutral amino acid transporter B(0) - Homo sapiens (Human)	0.9	0.9	0.9	17	15	15	0.9	15.6667	17.4074	3.81e-05
ABCE1_HUMAN	ABCE1_HUMAN	P61221	ABCE1	ATP-binding cassette sub-family E member 1 - Homo sapiens (Human)	0.9	0.9	0.9	8	13	19	0.9	13.3333	14.8148	5.72e-05
ACTN1_HUMAN	ACTN1_HUMAN	P12814	ACTN1	Alpha-actinin-1 - Homo sapiens (Human)	26	38	37	55	58	56	33.6667	56.3333	1.67327	0.00041661
ACTN4_HUMAN	ACTN4_HUMAN	O43707	ACTN4	Alpha-actinin-4 - Homo sapiens (Human)	23	20	27	32	38	49	23.3333	39.6667	1.7	0.000899932
ADK_HUMAN	ADK_HUMAN	P55263	ADK	Adenosine kinase - Homo sapiens (Human)	0.9	0.9	0.9	9	6	5	0.9	6.66667	7.40741	0.000699796
AHNK_HUMAN	AHNK_HUMAN	Q09666	AHNAK	Neuroblast differentiation-associated protein AHNAK - Homo sapiens (Human)	245	270	234	132	126	155	249.667	137.667	0.551402	1.36e-06
AL7A1_HUMAN	AL7A1_HUMAN	P49419	ALDH7A1	Alpha-aminoadipic semialdehyde dehydrogenase - Homo sapiens (Human)	9	4	9	0.9	0.9	0.9	7.33333	0.9	0.122727	0.000415248
ALDOA_HUMAN	ALDOA_HUMAN	P04075	ALDOA	Fructose-bisphosphate aldolase A - Homo sapiens (Human)	16	18	13	23	26	55	15.6667	34.6667	2.21277	0.000249149
AMPN_HUMAN	AMPN_HUMAN	P15144	ANPEP	Aminopeptidase N - Homo sapiens (Human)	0.9	0.9	0.9	22	24	24	0.9	23.3333	25.9259	5.45e-06
ANXA1_HUMAN	ANXA1_HUMAN	P04083	ANXA1	Annexin A1 - Homo sapiens (Human)	3	1	2	21	11	13	2	15	7.5	8.17e-05
ANXA2_HUMAN	ANXA2_HUMAN	P07355	ANXA2	Annexin A2 - Homo sapiens (Human)	58	65	62	47	22	28	61.6667	32.3333	0.524324	0.000147039
ANXA5_HUMAN	ANXA5_HUMAN	P08758	ANXA5	Annexin A5 - Homo sapiens (Human)	48	46	54	20	23	1	49.3333	14.6667	0.297297	1.77e-05
ANXA6_HUMAN	ANXA6_HUMAN	P08133	ANXA6	Annexin A6 - Homo sapiens (Human)	26	28	36	10	8	10	30	9.33333	0.311111	7.76e-05
APEX1_HUMAN	APEX1_HUMAN	P27695	APEX1	DNA-(apurinic or apyrimidinic site) lyase - Homo sapiens (Human)	8	14	6	2	1	2	9.33333	1.66667	0.178571	0.000383935
ARK72_HUMAN	ARK72_HUMAN	O43488	AKR7A2	Aflatoxin B1 aldehyde reductase member 2 - Homo sapiens (Human)	8	6	7	0.9	0.9	0.9	7	0.9	0.128571	0.000532335
ARLY_HUMAN	ARLY_HUMAN	P04424	ASL	Argininosuccinate lyase - Homo sapiens (Human)	0.9	0.9	0.9	15	7	7	0.9	9.66667	10.7407	0.000170184
ARPC2_HUMAN	ARPC2_HUMAN	O15144	ARPC2	Actin-related protein 2/3 complex subunit 2 - Homo sapiens (Human)	18	12	17	9	7	0.9	15.6667	5.63333	0.359574	0.000614023
ASAH1_HUMAN	ASAH1_HUMAN	Q13510	ASAH1	Acid ceramidase precursor - Homo sapiens (Human)	13	19	19	1	3	4	17	2.66667	0.156863	7.76e-05
ASNS_HUMAN	ASNS_HUMAN	P08243	ASNS	Asparagine synthetase [glutamine-hydrolyzing] - Homo sapiens (Human)	0.9	0.9	0.9	5	9	7	0.9	7	7.77778	0.000533696
AT2A2_HUMAN	AT2A2_HUMAN	P16615	ATP2A2	Sarcoplasmic/endoplasmic reticulum calcium ATPase 2 - Homo sapiens (Human)	9	6	7	30	24	26	7.33333	26.6667	3.63636	8.17e-05
AT5F1_HUMAN	AT5F1_HUMAN	P24539	ATP5F1	ATP synthase B chain, mitochondrial precursor - Homo sapiens (Human)	17	18	14	4	8	1	16.3333	4.33333	0.265306	0.000230088
BASI_HUMAN	BASI_HUMAN	P35613	BSG	Basigin precursor - Homo sapiens (Human)	2	2	2	12	18	14	2	14.6667	7.33333	8.44e-05
BAT3_HUMAN	BAT3_HUMAN	P46379	BAT3	Large proline-rich protein BAT3 - Homo sapiens (Human)	0.9	0.9	0.9	5	8	6	0.9	6.33333	7.03704	0.000834581
BZW1_HUMAN	BZW1_HUMAN	Q7L1Q6	BZW1	Basic leucine zipper and W2 domain-containing protein 1 - Homo sapiens (Human)	0.9	1	1	9	6	7	0.966667	7.33333	7.58621	0.000435671
CALX_HUMAN	CALX_HUMAN	P27824	CANX	Calnexin precursor - Homo sapiens (Human)	10	10	8	23	20	20	9.33333	21	2.25	0.000780123
CAPG_HUMAN	CAPG_HUMAN	P40121	CAPG	Macrophage-capping protein - Homo sapiens (Human)	21	16	8	6	5	4	15	5	0.333333	0.000479238
CAPZB_HUMAN	CAPZB_HUMAN	P47756	CAPZB	F-actin-capping protein subunit beta - Homo sapiens (Human)	11	14	14	5	3	0.9	13	2.96667	0.228205	0.000289993
CATD_HUMAN	CATD_HUMAN	P07339	CTSD	Cathepsin D precursor - Homo sapiens (Human)	70	37	68	9	17	5	58.3333	10.3333	0.177143	0
CAV1_HUMAN	CAV1_HUMAN	Q03135	CAV1	Caveolin-1 - Homo sapiens (Human)	0.9	0.9	0.9	15	3	2	0.9	6.66667	7.40741	0.000699796
CD109_HUMAN	CD109_HUMAN	Q6YHK3	CD109	CD109 antigen precursor - Homo sapiens (Human)	6	6	5	20	25	25	5.66667	23.3333	4.11765	8.17e-05
CD44_HUMAN	CD44_HUMAN	P16070	CD44	CD44 antigen precursor - Homo sapiens (Human)	26	28	27	10	10	11	27	10.3333	0.382716	0.000217835
CD63_HUMAN	CD63_HUMAN	P08962	CD63	CD63 antigen - Homo sapiens (Human)	13	17	20	2	13	4	16.6667	6.33333	0.38	0.000626276
CDK2_HUMAN	CDK2_HUMAN	P24941	CDK2	Cell division protein kinase 2 - Homo sapiens (Human)	5	7	8	1	1	0.9	6.66667	0.966667	0.145	0.000645337
CE170_HUMAN	CE170_HUMAN	Q5SW79	CEP170	Centrosomal protein of 170 kDa - Homo sapiens (Human)	0.9	0.9	0.9	4	11	6	0.9	7	7.77778	0.000533696
CH60_HUMAN	CH60_HUMAN	P10809	HSPD1	60 kDa heat shock protein, mitochondrial precursor - Homo sapiens (Human)	35	32	33	94	73	70	33.3333	79	2.37	2.31e-05
CKAP4_HUMAN	CKAP4_HUMAN	Q07065	CKAP4	Cytoskeleton-associated protein 4 - Homo sapiens (Human)	3	6	4	19	17	19	4.33333	18.3333	4.23077	0.000160654
CKAP5_HUMAN	CKAP5_HUMAN	Q14008	CKAP5	Cytoskeleton-associated protein 5 - Homo sapiens (Human)	4	3	3	22	21	18	3.33333	20.3333	6.1	5.72e-05
CO7A1_HUMAN	CO7A1_HUMAN	Q02388	COL7A1	Collagen alpha-1(VII) chain precursor - Homo sapiens (Human)	0.9	0.9	0.9	10	10	10	0.9	10	11.1111	0.000168822
COA1_HUMAN	ACACA_HUMAN	Q13085	ACACA	Acetyl-CoA carboxylase 1 - Homo sapiens (Human)	1	2	3	10	12	10	2	10.6667	5.33333	0.000329476
COPB2_HUMAN	COPB2_HUMAN	P35606	COPB2	Coatomer subunit beta' - Homo sapiens (Human)	6	5	1	11	13	16	4	13.3333	3.33333	0.000488768
COPG_HUMAN	COPG_HUMAN	Q9Y678	COPG	Coatomer subunit gamma - Homo sapiens (Human)	4	2	1	14	12	8	2.33333	11.3333	4.85714	0.000332199
CORO7_HUMAN	CORO7_HUMAN	P57737	CORO7	Coronin-7 - Homo sapiens (Human)	8	6	4	0.9	0.9	0.9	6	0.9	0.15	0.00096256
CRYL1_HUMAN	CRYL1_HUMAN	Q9Y2S2	CRYL1	Lambda-crystallin homolog - Homo sapiens (Human)	4	9	9	0.9	0.9	0.9	7.33333	0.9	0.122727	0.000415248
CSPG4_HUMAN	CSPG4_HUMAN	Q6UVK1	CSPG4	Chondroitin sulfate proteoglycan 4 precursor - Homo sapiens (Human)	3	7	3	15	13	11	4.33333	13	3	0.00078693
DDB1_HUMAN	DDB1_HUMAN	Q16531	DDB1	DNA damage-binding protein 1 - Homo sapiens (Human)	3	5	1	9	13	11	3	11	3.66667	0.000673928
DDX1_HUMAN	DDX1_HUMAN	Q92499	DDX1	ATP-dependent RNA helicase DDX1 - Homo sapiens (Human)	3	3	1	13	12	15	2.33333	13.3333	5.71429	0.000170184
DDX3X_HUMAN	DDX3X_HUMAN	O00571	DDX3X	ATP-dependent RNA helicase DDX3X - Homo sapiens (Human)	1	3	3	9	11	11	2.33333	10.3333	4.42857	0.000458816
DHB4_HUMAN	DHB4_HUMAN	P51659	HSD17B4	Peroxisomal multifunctional enzyme type 2 - Homo sapiens (Human)	4	7	8	15	23	19	6.33333	19	3	0.000328114
DHX15_HUMAN	DHX15_HUMAN	O43143	DHX15	Putative pre-mRNA-splicing factor ATP-dependent RNA helicase DHX15 - Homo sapiens (Human)	8	4	8	17	20	21	6.66667	19.3333	2.9	0.000337645
DHX9_HUMAN	DHX9_HUMAN	Q08211	DHX9	ATP-dependent RNA helicase A - Homo sapiens (Human)	17	12	12	28	35	26	13.6667	29.6667	2.17073	0.000386658
DNM1L_HUMAN	DNM1L_HUMAN	O00429	DNM1L	Dynamin-1-like protein - Homo sapiens (Human)	2	6	3	19	17	14	3.66667	16.6667	4.54545	0.000168822
DNMT1_HUMAN	DNMT1_HUMAN	P26358	DNMT1	DNA - Homo sapiens (Human)	0.9	0.9	0.9	5	8	6	0.9	6.33333	7.03704	0.000834581
DPP4_HUMAN	DPP4_HUMAN	P27487	DPP4	Dipeptidyl peptidase 4 - Homo sapiens (Human)	31	25	19	0.9	0.9	0.9	25	0.9	0.036	1.36e-06
ECM29_HUMAN	ECM29_HUMAN	Q5VYK3	ECM29	Proteasome-associated protein ECM29 homolog - Homo sapiens (Human)	2	1	2	21	21	21	1.66667	21	12.6	1.77e-05
EF1A2_HUMAN	EF1A2_HUMAN	Q05639	EEF1A2	Elongation factor 1-alpha 2 - Homo sapiens (Human)	0.9	0.9	0.9	12	9	12	0.9	11	12.2222	0.000104833
EF1G_HUMAN	EF1G_HUMAN	P26641	EEF1G	Elongation factor 1-gamma - Homo sapiens (Human)	7	19	5	16	28	23	10.3333	22.3333	2.16129	0.000820967
EIF2A_HUMAN	EIF2A_HUMAN	Q9BY44	EIF2A	Eukaryotic translation initiation factor 2A - Homo sapiens (Human)	1	0.9	1	5	7	7	0.966667	6.33333	6.55172	0.000834581
ENOA_HUMAN	ENOA_HUMAN	P06733	ENO1	Alpha-enolase - Homo sapiens (Human)	23	17	22	75	74	56	20.6667	68.3333	3.30645	5.45e-06
ENOG_HUMAN	ENOG_HUMAN	P09104	ENO2	Gamma-enolase - Homo sapiens (Human)	8	9	8	0.9	2	3	8.33333	1.96667	0.236	0.000857726
EPS8_HUMAN	EPS8_HUMAN	Q12929	EPS8	Epidermal growth factor receptor kinase substrate 8 - Homo sapiens (Human)	0.9	3	0.9	12	15	10	1.6	12.3333	7.70833	0.000160654
ERO1A_HUMAN	ERO1A_HUMAN	Q96HE7	ERO1L	ERO1-like protein alpha precursor - Homo sapiens (Human)	3	4	3	8	21	17	3.33333	15.3333	4.6	0.000178353
FAS_HUMAN	FAS_HUMAN	P49327	FASN	Fatty acid synthase - Homo sapiens (Human)	61	69	57	122	153	167	62.3333	147.333	2.36364	1.36e-06
FINC_HUMAN	FINC_HUMAN	P02751	FN1	Fibronectin precursor - Homo sapiens (Human)	1	1	2	98	81	90	1.33333	89.6667	67.25	0
FKBP4_HUMAN	FKBP4_HUMAN	Q02790	FKBP4	FK506-binding protein 4 - Homo sapiens (Human)	8	4	7	18	22	19	6.33333	19.6667	3.10526	0.000269571
FKBP5_HUMAN	FKBP5_HUMAN	Q13451	FKBP5	FK506-binding protein 5 - Homo sapiens (Human)	2	1	6	12	15	16	3	14.3333	4.77778	0.000186521
FLNB_HUMAN	FLNB_HUMAN	O75369	FLNB	Filamin-B - Homo sapiens (Human)	0.9	1	2	18	27	23	1.3	22.6667	17.4359	1.36e-05
FLNC_HUMAN	FLNC_HUMAN	Q14315	FLNC	Filamin-C - Homo sapiens (Human)	0.9	0.9	0.9	48	45	48	0.9	47	52.2222	0
FSCN1_HUMAN	FSCN1_HUMAN	Q16658	FSCN1	Fascin - Homo sapiens (Human)	2	0.9	1	14	10	14	1.3	12.6667	9.74359	9.26e-05
FUBP1_HUMAN	FUBP1_HUMAN	Q96AE4	FUBP1	Far upstream element-binding protein 1 - Homo sapiens (Human)	1	0.9	1	11	8	11	0.966667	10	10.3448	0.000168822
G6PI_HUMAN	G6PI_HUMAN	P06744	GPI	Glucose-6-phosphate isomerase - Homo sapiens (Human)	16	11	17	34	40	41	14.6667	38.3333	2.61364	9.26e-05
GBB1_HUMAN	GBB1_HUMAN	P62873	GNB1	Guanine nucleotide-binding protein G(I)/G(S)/G(T) subunit beta-1 - Homo sapiens (Human)	5	8	7	0.9	0.9	0.9	6.66667	0.9	0.135	0.000645337
GBF1_HUMAN	GBF1_HUMAN	Q92538	GBF1	Golgi-specific brefeldin A-resistance guanine nucleotide exchange factor 1 - Homo sapiens (Human)	0.9	0.9	0.9	18	11	14	0.9	14.3333	15.9259	4.49e-05
GCN1L_HUMAN	GCN1L_HUMAN	Q92616	GCN1L1	GCN1-like protein 1 - Homo sapiens (Human)	12	12	15	40	39	44	13	41	3.15385	4.49e-05
GCS1_HUMAN	MOGS_HUMAN	Q13724	MOGS	Mannosyl-oligosaccharide glucosidase - Homo sapiens (Human)	1	1	3	9	9	9	1.66667	9	5.4	0.000434309
GELS_HUMAN	GELS_HUMAN	P06396	GSN	Gelsolin precursor - Homo sapiens (Human)	43	48	44	10	12	8	45	10	0.222222	9.53e-06
GFPT1_HUMAN	GFPT1_HUMAN	Q06210	GFPT1	Glucosamine--fructose-6-phosphate aminotransferase [isomerizing] 1 - Homo sapiens (Human)	0.9	0.9	0.9	10	7	7	0.9	8	8.88889	0.000337645
GLSK_HUMAN	GLSK_HUMAN	O94925	GLS	Glutaminase kidney isoform, mitochondrial precursor - Homo sapiens (Human)	0.9	0.9	0.9	8	7	5	0.9	6.66667	7.40741	0.000699796
GPNMB_HUMAN	GPNMB_HUMAN	Q14956	GPNMB	Transmembrane glycoprotein NMB precursor - Homo sapiens (Human)	22	18	23	5	2	3	21	3.33333	0.15873	4.22e-05
GRHPR_HUMAN	GRHPR_HUMAN	Q9UBQ7	GRHPR	Glyoxylate reductase/hydroxypyruvate reductase - Homo sapiens (Human)	11	10	8	4	0.9	1	9.66667	1.96667	0.203448	0.000423417
GSH1_HUMAN	GSH1_HUMAN	P48506	GCLC	Glutamate--cysteine ligase catalytic subunit - Homo sapiens (Human)	2	1	0.9	4	8	12	1.3	8	6.15385	0.000486045
GSHR_HUMAN	GSHR_HUMAN	P00390	GSR	Glutathione reductase, mitochondrial precursor - Homo sapiens (Human)	2	0.9	3	12	11	10	1.96667	11	5.59322	0.000281824
GTR1_HUMAN	GTR1_HUMAN	P11166	SLC2A1	Solute carrier family 2, facilitated glucose transporter member 1 - Homo sapiens (Human)	0.9	0.9	0.9	13	10	13	0.9	12	13.3333	8.17e-05
GUAA_HUMAN	GUAA_HUMAN	P49915	GMPS	GMP synthase [glutamine-hydrolyzing] - Homo sapiens (Human)	1	2	1	10	9	12	1.33333	10.3333	7.75	0.000186521
H11_HUMAN	H11_HUMAN	Q02539	HIST1H1A	Histone H1.1 - Homo sapiens (Human)	9	8	10	0.9	0.9	0.9	9	0.9	0.1	0.000217835
H12_HUMAN	H12_HUMAN	P16403	HIST1H1C	Histone H1.2 - Homo sapiens (Human)	9	12	10	3	4	1	10.3333	2.66667	0.258065	0.000619469
H2A1B_HUMAN	H2A1B_HUMAN	P04908	HIST1H2AB	Histone H2A type 1-B - Homo sapiens (Human)	0.9	0.9	0.9	8	14	10	0.9	10.6667	11.8519	0.000133424
HNRPK_HUMAN	HNRPK_HUMAN	P61978	HNRNPK	Heterogeneous nuclear ribonucleoprotein K - Homo sapiens (Human)	51	32	45	28	19	20	42.6667	22.3333	0.523438	0.000313138
HNRPQ_HUMAN	HNRPQ_HUMAN	O60506	SYNCRIP	Heterogeneous nuclear ribonucleoprotein Q - Homo sapiens (Human)	8	6	5	27	17	26	6.33333	23.3333	3.68421	9.8e-05
HNRPR_HUMAN	HNRPR_HUMAN	O43390	HNRNPR	Heterogeneous nuclear ribonucleoprotein R - Homo sapiens (Human)	3	3	4	14	13	12	3.33333	13	3.9	0.000383935
HS74L_HUMAN	HS74L_HUMAN	O95757	HSPA4L	Heat shock 70 kDa protein 4L - Homo sapiens (Human)	0.9	0.9	0.9	6	8	9	0.9	7.66667	8.51852	0.000393465
HS90A_HUMAN	HS90A_HUMAN	P07900	HSP90AA1	Heat shock protein HSP 90-alpha - Homo sapiens (Human)	52	51	45	70	76	112	49.3333	86	1.74324	0.000121171
HS90B_HUMAN	HS90B_HUMAN	P08238	HSP90AB1	Heat shock protein HSP 90-beta - Homo sapiens (Human)	11	10	18	32	33	26	13	30.3333	2.33333	0.000270933
HSP71_HUMAN	HSP71_HUMAN	P08107	HSPA1A	Heat shock 70 kDa protein 1 - Homo sapiens (Human)	6	10	7	19	16	24	7.66667	19.6667	2.56522	0.000475153
HSP72_HUMAN	HSP72_HUMAN	P54652	HSPA2	Heat shock-related 70 kDa protein 2 - Homo sapiens (Human)	25	16	17	8	4	6	19.3333	6	0.310345	0.000230088
HUWE1_HUMAN	HUWE1_HUMAN	Q7Z6Z7	HUWE1	E3 ubiquitin-protein ligase HUWE1 - Homo sapiens (Human)	6	8	5	20	16	14	6.33333	16.6667	2.63158	0.000699796
HYEP_HUMAN	HYEP_HUMAN	P07099	EPHX1	Epoxide hydrolase 1 - Homo sapiens (Human)	15	10	7	3	2	3	10.6667	2.66667	0.25	0.000540504
IDHP_HUMAN	IDHP_HUMAN	P48735	IDH2	Isocitrate dehydrogenase [NADP], mitochondrial precursor - Homo sapiens (Human)	12	11	7	3	2	1	10	2	0.2	0.000400272
IF2B1_HUMAN	IF2B1_HUMAN	Q9NZI8	IGF2BP1	Insulin-like growth factor 2 mRNA-binding protein 1 - Homo sapiens (Human)	0.9	0.9	0.9	6	9	6	0.9	7	7.77778	0.000533696
IF2B3_HUMAN	IF2B3_HUMAN	O00425	IGF2BP3	Insulin-like growth factor 2 mRNA-binding protein 3 - Homo sapiens (Human)	0.9	0.9	0.9	5	9	11	0.9	8.33333	9.25926	0.000299523
IF4G1_HUMAN	IF4G1_HUMAN	Q04637	EIF4G1	Eukaryotic translation initiation factor 4 gamma 1 - Homo sapiens (Human)	4	12	9	19	24	18	8.33333	20.3333	2.44	0.000604493
IF5_HUMAN	IF5_HUMAN	P55010	EIF5	Eukaryotic translation initiation factor 5 - Homo sapiens (Human)	1	2	0.9	7	7	8	1.3	7.33333	5.64103	0.000771954
IF5A1_HUMAN	IF5A1_HUMAN	P63241	EIF5A	Eukaryotic translation initiation factor 5A-1 - Homo sapiens (Human)	1	5	1	8	23	7	2.33333	12.6667	5.42857	0.000216474
IMA2_HUMAN	IMA2_HUMAN	P52292	KPNA2	Importin subunit alpha-2 - Homo sapiens (Human)	2	1	2	7	9	7	1.66667	7.66667	4.6	0.000946222
IMB1_HUMAN	IMB1_HUMAN	Q14974	KPNB1	Importin subunit beta-1 - Homo sapiens (Human)	13	19	16	26	36	43	16	35	2.1875	0.000260041
IMDH2_HUMAN	IMDH2_HUMAN	P12268	IMPDH2	Inosine-5'-monophosphate dehydrogenase 2 - Homo sapiens (Human)	2	2	3	9	10	11	2.33333	10	4.28571	0.000605854
IREB1_HUMAN	ACOC_HUMAN	P21399	ACO1	Iron-responsive element-binding protein 1 - Homo sapiens (Human)	3	4	3	10	14	11	3.33333	11.6667	3.5	0.000664398
ITA2_HUMAN	ITA2_HUMAN	P17301	ITGA2	Integrin alpha-2 precursor - Homo sapiens (Human)	0.9	0.9	0.9	7	6	7	0.9	6.66667	7.40741	0.000699796
K1C10_HUMAN	K1C10_HUMAN	P13645	KRT10	Keratin, type I cytoskeletal 10 - Homo sapiens (Human)	82	82	79	0.9	0.9	0.9	81	0.9	0.0111111	0
K1C9_HUMAN	K1C9_HUMAN	P35527	KRT9	Keratin, type I cytoskeletal 9 - Homo sapiens (Human)	41	49	59	0.9	0.9	0.9	49.6667	0.9	0.0181208	0
K22E_HUMAN	K22E_HUMAN	P35908	KRT2	Keratin, type II cytoskeletal 2 epidermal - Homo sapiens (Human)	53	51	61	0.9	0.9	0.9	55	0.9	0.0163636	0
K2C1_HUMAN	K2C1_HUMAN	P04264	KRT1	Keratin, type II cytoskeletal 1 - Homo sapiens (Human)	96	83	82	0.9	0.9	0.9	87	0.9	0.0103448	0
K2C5_HUMAN	K2C5_HUMAN	P13647	KRT5	Keratin, type II cytoskeletal 5 - Homo sapiens (Human)	7	6	11	0.9	0.9	0.9	8	0.9	0.1125	0.000330837
KCRB_HUMAN	KCRB_HUMAN	P12277	CKB	Creatine kinase B-type - Homo sapiens (Human)	0.9	0.9	0.9	19	14	22	0.9	18.3333	20.3704	1.77e-05
KPYM_HUMAN	KPYM_HUMAN	P14618	PKM2	Pyruvate kinase isozymes M1/M2 - Homo sapiens (Human)	65	86	74	107	116	127	75	116.667	1.55556	0.000164738
KRT81_HUMAN	KRT81_HUMAN	Q14533	KRT81	Keratin type II cuticular Hb1 - Homo sapiens (Human)	16	17	15	1	1	0.9	16	0.966667	0.0604167	3.4e-05
KU70_HUMAN	KU70_HUMAN	P12956	XRCC6	ATP-dependent DNA helicase 2 subunit 1 - Homo sapiens (Human)	10	16	10	23	29	21	12	24.3333	2.02778	0.000899932
KU86_HUMAN	KU86_HUMAN	P13010	XRCC5	ATP-dependent DNA helicase 2 subunit 2 - Homo sapiens (Human)	9	10	6	22	21	25	8.33333	22.6667	2.72	0.000296801
LAMB1_HUMAN	LAMB1_HUMAN	P07942	LAMB1	Laminin subunit beta-1 precursor - Homo sapiens (Human)	0.9	0.9	0.9	6	9	7	0.9	7.33333	8.14815	0.000435671
LAP2A_HUMAN	LAP2A_HUMAN	P42166	TMPO	Lamina-associated polypeptide 2 isoform alpha - Homo sapiens (Human)	2	1	4	19	10	10	2.33333	13	5.57143	0.000182437
LEG3_HUMAN	LEG3_HUMAN	P17931	LGALS3	Galectin-3 - Homo sapiens (Human)	20	16	23	3	5	0.9	19.6667	2.96667	0.150847	5.85e-05
LMAN1_HUMAN	LMAN1_HUMAN	P49257	LMAN1	Protein ERGIC-53 precursor - Homo sapiens (Human)	0.9	0.9	0.9	7	8	11	0.9	8.66667	9.62963	0.000260041
LSM2_HUMAN	LSM2_HUMAN	Q9Y333	LSM2	U6 snRNA-associated Sm-like protein LSm2 - Homo sapiens (Human)	0.9	0.9	0.9	5	11	4	0.9	6.66667	7.40741	0.000699796
MACF1_HUMAN	MACF1_HUMAN	Q9UPN3	MACF1	Microtubule-actin cross-linking factor 1, isoforms 1/2/3/5 - Homo sapiens (Human)	3	1	1	8	11	15	1.66667	11.3333	6.8	0.000182437
MAGD2_HUMAN	MAGD2_HUMAN	Q9UNF1	MAGED2	Melanoma-associated antigen D2 - Homo sapiens (Human)	0.9	0.9	0.9	6	9	4	0.9	6.33333	7.03704	0.000834581
MAOX_HUMAN	MAOX_HUMAN	P48163	ME1	NADP-dependent malic enzyme - Homo sapiens (Human)	0.9	0.9	0.9	8	10	4	0.9	7.33333	8.14815	0.000435671
MAP1B_HUMAN	MAP1B_HUMAN	P46821	MAP1B	Microtubule-associated protein 1B - Homo sapiens (Human)	2	0.9	0.9	31	28	26	1.26667	28.3333	22.3684	5.45e-06
MARCS_HUMAN	MARCS_HUMAN	P29966	MARCKS	Myristoylated alanine-rich C-kinase substrate - Homo sapiens (Human)	17	12	10	0.9	0.9	0.9	13	0.9	0.0692308	6.67e-05
MBB1A_HUMAN	MBB1A_HUMAN	Q9BQG0	MYBBP1A	Myb-binding protein 1A - Homo sapiens (Human)	1	0.9	2	9	10	5	1.3	8	6.15385	0.000486045
MCCC2_HUMAN	MCCB_HUMAN	Q9HCC0	MCCC2	Methylcrotonoyl-CoA carboxylase beta chain, mitochondrial precursor - Homo sapiens (Human)	0.9	0.9	0.9	4	7	9	0.9	6.66667	7.40741	0.000699796
MCM6_HUMAN	MCM6_HUMAN	Q14566	MCM6	DNA replication licensing factor MCM6 - Homo sapiens (Human)	0.9	0.9	0.9	5	10	8	0.9	7.66667	8.51852	0.000393465
MICA1_HUMAN	MICA1_HUMAN	Q8TDZ2	MICAL1	NEDD9-interacting protein with calponin homology and LIM domains - Homo sapiens (Human)	6	6	6	0.9	0.9	0.9	6	0.9	0.15	0.00096256
MIF_HUMAN	MIF_HUMAN	P14174	MIF	Macrophage migration inhibitory factor - Homo sapiens (Human)	0.9	0.9	0.9	6	7	6	0.9	6.33333	7.03704	0.000834581
MP2K1_HUMAN	MP2K1_HUMAN	Q02750	MAP2K1	Dual specificity mitogen-activated protein kinase kinase 1 - Homo sapiens (Human)	0.9	1	1	11	3	8	0.966667	7.33333	7.58621	0.000435671
MY18A_HUMAN	MY18A_HUMAN	Q92614	MYO18A	Myosin-XVIIIa - Homo sapiens (Human)	4	11	7	0.9	0.9	0.9	7.33333	0.9	0.122727	0.000415248
MYH10_HUMAN	MYH10_HUMAN	P35580	MYH10	Myosin-10 - Homo sapiens (Human)	66	74	62	19	22	24	67.3333	21.6667	0.321782	6.81e-06
MYH11_HUMAN	MYH11_HUMAN	P35749	MYH11	Myosin-11 - Homo sapiens (Human)	3	5	4	13	18	15	4	15.3333	3.83333	0.000270933
MYH9_HUMAN	MYH9_HUMAN	P35579	MYH9	Myosin-9 - Homo sapiens (Human)	71	84	75	148	153	147	76.6667	149.333	1.94783	1.77e-05
MYO1C_HUMAN	MYO1C_HUMAN	O00159	MYO1C	Myosin-Ic - Homo sapiens (Human)	15	12	7	2	3	6	11.3333	3.66667	0.323529	0.000894486
MYO1D_HUMAN	MYO1D_HUMAN	O94832	MYO1D	Myosin-Id - Homo sapiens (Human)	18	19	17	0.9	0.9	0.9	18	0.9	0.05	1.77e-05
MYO5A_HUMAN	MYO5A_HUMAN	Q9Y4I1	MYO5A	Myosin-Va - Homo sapiens (Human)	28	25	26	0.9	0.9	0.9	26.3333	0.9	0.0341772	1.36e-06
MYOF_HUMAN	MYOF_HUMAN	Q9NZM1	MYOF	Myoferlin - Homo sapiens (Human)	16	13	18	62	81	78	15.6667	73.6667	4.70213	1.36e-06
NAGK_HUMAN	NAGK_HUMAN	Q9UJ70	NAGK	N-acetylglucosamine kinase - Homo sapiens (Human)	4	9	6	0.9	0.9	0.9	6.33333	0.9	0.142105	0.000754255
NAMPT_HUMAN	NAMPT_HUMAN	P43490	NAMPT	Nicotinamide phosphoribosyltransferase - Homo sapiens (Human)	2	2	5	18	14	15	3	15.6667	5.22222	0.000142954
NARG1_HUMAN	NARG1_HUMAN	Q9BXJ9	NARG1	NMDA receptor-regulated protein 1 - Homo sapiens (Human)	1	0.9	2	15	10	9	1.3	11.3333	8.71795	0.000163376
NB5R3_HUMAN	NB5R3_HUMAN	P00387	CYB5R3	NADH-cytochrome b5 reductase 3 - Homo sapiens (Human)	12	15	17	7	9	0.9	14.6667	5.63333	0.384091	0.00087951
NCBP1_HUMAN	NCBP1_HUMAN	Q09161	NCBP1	Nuclear cap-binding protein subunit 1 - Homo sapiens (Human)	0.9	0.9	0.9	8	7	8	0.9	7.66667	8.51852	0.000393465
NMT1_HUMAN	NMT1_HUMAN	P30419	NMT1	Glycylpeptide N-tetradecanoyltransferase 1 - Homo sapiens (Human)	2	2	1	12	7	9	1.66667	9.33333	5.6	0.000404357
NPC1_HUMAN	NPC1_HUMAN	O15118	NPC1	Niemann-Pick C1 protein precursor - Homo sapiens (Human)	0.9	1	2	11	12	10	1.3	11	8.46154	0.000168822
NQO1_HUMAN	NQO1_HUMAN	P15559	NQO1	NAD(P)H dehydrogenase [quinone] 1 - Homo sapiens (Human)	11	11	12	3	3	0.9	11.3333	2.3	0.202941	0.000313138
NU153_HUMAN	NU153_HUMAN	P49790	NUP153	Nuclear pore complex protein Nup153 - Homo sapiens (Human)	1	0.9	1	12	7	5	0.966667	8	8.27586	0.000337645
NU205_HUMAN	NU205_HUMAN	Q92621	NUP205	Nuclear pore complex protein Nup205 - Homo sapiens (Human)	6	3	3	19	20	18	4	19	4.75	9.26e-05
NUCL_HUMAN	NUCL_HUMAN	P19338	NCL	Nucleolin - Homo sapiens (Human)	20	13	19	45	37	45	17.3333	42.3333	2.44231	9.26e-05
P5CS_HUMAN	P5CS_HUMAN	P54886	ALDH18A1	Delta-1-pyrroline-5-carboxylate synthetase - Homo sapiens (Human)	4	4	3	11	13	11	3.66667	11.6667	3.18182	0.000878148
PA24A_HUMAN	PA24A_HUMAN	P47712	PLA2G4A	Cytosolic phospholipase A2 - Homo sapiens (Human)	0.9	0.9	0.9	11	8	6	0.9	8.33333	9.25926	0.000299523
PAI2_HUMAN	PAI2_HUMAN	P05120	SERPINB2	Plasminogen activator inhibitor 2 precursor - Homo sapiens (Human)	0.9	0.9	0.9	15	12	9	0.9	12	13.3333	8.17e-05
PCBP1_HUMAN	PCBP1_HUMAN	Q15365	PCBP1	Poly(rC)-binding protein 1 - Homo sapiens (Human)	18	12	21	5	3	5	17	4.33333	0.254902	0.000178353
PDIA1_HUMAN	PDIA1_HUMAN	P07237	P4HB	Protein disulfide-isomerase precursor - Homo sapiens (Human)	15	13	12	46	36	26	13.3333	36	2.7	9.26e-05
PDIA4_HUMAN	PDIA4_HUMAN	P13667	PDIA4	Protein disulfide-isomerase A4 precursor - Homo sapiens (Human)	4	4	5	33	29	29	4.33333	30.3333	7	1.77e-05
PHB_HUMAN	PHB_HUMAN	P35232	PHB	Prohibitin - Homo sapiens (Human)	13	13	16	8	7	0.9	14	5.3	0.378571	0.000977536
PICAL_HUMAN	PICAL_HUMAN	Q13492	PICALM	Phosphatidylinositol-binding clathrin assembly protein - Homo sapiens (Human)	0.9	1	2	7	5	9	1.3	7	5.38462	0.000899932
PIR_HUMAN	PIR_HUMAN	O00625	PIR	Pirin - Homo sapiens (Human)	8	16	10	0.9	0.9	0.9	11.3333	0.9	0.0794118	8.58e-05
PLEC1_HUMAN	PLEC1_HUMAN	Q15149	PLEC1	Plectin-1 - Homo sapiens (Human)	102	136	93	247	230	305	110.333	260.667	2.36254	0
PME17_HUMAN	PME17_HUMAN	P40967	SILV	Melanocyte protein Pmel 17 precursor - Homo sapiens (Human)	43	55	49	0.9	0.9	0.9	49	0.9	0.0183673	0
PRDX6_HUMAN	PRDX6_HUMAN	P30041	PRDX6	Peroxiredoxin-6 - Homo sapiens (Human)	6	1	2	17	9	9	3	11.6667	3.88889	0.000458816
PRKDC_HUMAN	PRKDC_HUMAN	P78527	PRKDC	DNA-dependent protein kinase catalytic subunit - Homo sapiens (Human)	59	56	48	125	120	135	54.3333	126.667	2.33129	5.45e-06
PRP8_HUMAN	PRP8_HUMAN	Q6P2Q9	PRPF8	Pre-mRNA-processing-splicing factor 8 - Homo sapiens (Human)	12	11	3	22	14	28	8.66667	21.3333	2.46154	0.000447924
PRS6A_HUMAN	PRS6A_HUMAN	P17980	PSMC3	26S protease regulatory subunit 6A - Homo sapiens (Human)	8	4	8	21	15	15	6.66667	17	2.55	0.000770592
PSMD3_HUMAN	PSMD3_HUMAN	O43242	PSMD3	26S proteasome non-ATPase regulatory subunit 3 - Homo sapiens (Human)	7	3	2	13	12	12	4	12.3333	3.08333	0.000830497
PTBP1_HUMAN	PTBP1_HUMAN	P26599	PTBP1	Polypyrimidine tract-binding protein 1 - Homo sapiens (Human)	15	8	10	31	29	35	11	31.6667	2.87879	9.67e-05
PYR1_HUMAN	PYR1_HUMAN	P27708	CAD	CAD protein [Includes: Glutamine-dependent carbamoyl-phosphate synthase - Homo sapiens (Human)	2	2	4	31	22	31	2.66667	28	10.5	1.36e-05
PYRG1_HUMAN	PYRG1_HUMAN	P17812	CTPS	CTP synthase 1 - Homo sapiens (Human)	0.9	0.9	0.9	8	9	10	0.9	9	10	0.000230088
Q6IA88_HUMAN	S38A2_HUMAN	Q6IA88	SLC38A2	SLC38A2 protein - Homo sapiens (Human)	0.9	0.9	0.9	16	23	19	0.9	19.3333	21.4815	1.77e-05
Q96QD8_HUMAN	S38A2_HUMAN	Q96QD8	SLC38A2	Solute carrier family 38 member 2 - Homo sapiens (Human)	0.9	0.9	0.9	12	10	7	0.9	9.66667	10.7407	0.000170184
RAB32_HUMAN	RAB32_HUMAN	Q13637	RAB32	Ras-related protein Rab-32 - Homo sapiens (Human)	15	10	7	3	4	2	10.6667	3	0.28125	0.000680735
RALY_HUMAN	RALY_HUMAN	Q9UKM9	RALY	RNA-binding protein Raly - Homo sapiens (Human)	24	8	9	4	0.9	10	13.6667	4.96667	0.363415	0.00087951
RENT1_HUMAN	RENT1_HUMAN	Q92900	UPF1	Regulator of nonsense transcripts 1 - Homo sapiens (Human)	1	0.9	2	7	4	12	1.3	7.66667	5.89744	0.000649421
RETST_HUMAN	RETST_HUMAN	Q6NUM9	RETSAT	All-trans-retinol 13,14-reductase precursor - Homo sapiens (Human)	8	5	9	1	1	2	7.33333	1.33333	0.181818	0.000673928
RGP1_HUMAN	RAGP1_HUMAN	P46060	RANGAP1	Ran GTPase-activating protein 1 - Homo sapiens (Human)	1	2	2	12	5	6	1.66667	7.66667	4.6	0.000946222
RIB2_HUMAN	RPN2_HUMAN	P04844	RPN2	Dolichyl-diphosphooligosaccharide--protein glycosyltransferase 63 kDa subunit precursor - Homo sapiens (Human)	7	7	9	22	27	26	7.66667	25	3.26087	0.000140231
RL19_HUMAN	RL19_HUMAN	P84098	RPL19	60S ribosomal protein L19 - Homo sapiens (Human)	0.9	0.9	0.9	2	21	2	0.9	8.33333	9.25926	0.000299523
RL26L_HUMAN	RL26L_HUMAN	Q9UNX3	RPL26L1	60S ribosomal protein L26-like 1 - Homo sapiens (Human)	2	4	5	23	13	5	3.66667	13.6667	3.72727	0.00037985
RL9_HUMAN	RL9_HUMAN	P32969	RPL9	60S ribosomal protein L9 - Homo sapiens (Human)	1	3	1	7	10	8	1.66667	8.33333	5	0.000664398
ROA3_HUMAN	ROA3_HUMAN	P51991	HNRNPA3	Heterogeneous nuclear ribonucleoprotein A3 - Homo sapiens (Human)	11	9	7	4	2	1	9	2.33333	0.259259	0.000855003
RPA1_HUMAN	RPA1_HUMAN	O95602	POLR1A	DNA-directed RNA polymerase I subunit RPA1 - Homo sapiens (Human)	0.9	0.9	0.9	11	9	9	0.9	9.66667	10.7407	0.000170184
RS8_HUMAN	RS8_HUMAN	P62241	RPS8	40S ribosomal protein S8 - Homo sapiens (Human)	4	0.9	4	16	10	5	2.96667	10.3333	3.48315	0.000912185
S10A6_HUMAN	S10A6_HUMAN	P06703	S100A6	Protein S100-A6 - Homo sapiens (Human)	6	19	8	2	1	2	11	1.66667	0.151515	0.000212389
SATT_HUMAN	SATT_HUMAN	P43007	SLC1A4	Neutral amino acid transporter A - Homo sapiens (Human)	13	11	13	3	1	3	12.3333	2.33333	0.189189	0.000220558
SC22B_HUMAN	SC22B_HUMAN	O75396	SEC22B	Vesicle-trafficking protein SEC22b - Homo sapiens (Human)	16	14	27	6	6	7	19	6.33333	0.333333	0.000307692
SF3B3_HUMAN	SF3B3_HUMAN	Q15393	SF3B3	Splicing factor 3B subunit 3 - Homo sapiens (Human)	7	11	6	34	27	29	8	30	3.75	5.72e-05
SFRS1_HUMAN	SFRS1_HUMAN	Q07955	SFRS1	Splicing factor, arginine/serine-rich 1 - Homo sapiens (Human)	12	7	12	3	5	0.9	10.3333	2.96667	0.287097	0.000819605
SMC4_HUMAN	SMC4_HUMAN	Q9NTJ3	SMC4	Structural maintenance of chromosomes protein 4 - Homo sapiens (Human)	0.9	0.9	0.9	5	7	7	0.9	6.33333	7.03704	0.000834581
SNAA_HUMAN	SNAA_HUMAN	P54920	NAPA	Alpha-soluble NSF attachment protein - Homo sapiens (Human)	21	11	13	3	4	0.9	15	2.63333	0.175556	0.000127978
SORT_HUMAN	SORT_HUMAN	Q99523	SORT1	Sortilin precursor - Homo sapiens (Human)	5	8	6	0.9	0.9	0.9	6.33333	0.9	0.142105	0.000754255
SPT16_HUMAN	SP16H_HUMAN	Q9Y5B9	SUPT16H	FACT complex subunit SPT16 - Homo sapiens (Human)	4	4	3	26	22	27	3.66667	25	6.81818	3.13e-05
SPTA2_HUMAN	SPTA2_HUMAN	Q13813	SPTAN1	Spectrin alpha chain, brain - Homo sapiens (Human)	113	117	97	15	17	12	109	14.6667	0.134557	0
SPTB2_HUMAN	SPTB2_HUMAN	Q01082	SPTBN1	Spectrin beta chain, brain 1 - Homo sapiens (Human)	79	98	64	3	9	9	80.3333	7	0.0871369	0
SRP72_HUMAN	SRP72_HUMAN	O76094	SRP72	Signal recognition particle 72 kDa protein - Homo sapiens (Human)	2	3	1	9	10	8	2	9	4.5	0.000679374
STX7_HUMAN	STX7_HUMAN	O15400	STX7	Syntaxin-7 - Homo sapiens (Human)	6	9	11	1	2	0.9	8.66667	1.3	0.15	0.000366236
STXB1_HUMAN	STXB1_HUMAN	P61764	STXBP1	Syntaxin-binding protein 1 - Homo sapiens (Human)	4	10	11	0.9	0.9	0.9	8.33333	0.9	0.108	0.000280463
SYDM_HUMAN	SYDM_HUMAN	Q6PI48	DARS2	Aspartyl-tRNA synthetase, mitochondrial precursor - Homo sapiens (Human)	1	1	0.9	7	5	7	0.966667	6.33333	6.55172	0.000834581
SYEP_HUMAN	SYEP_HUMAN	P07814	EPRS	Bifunctional aminoacyl-tRNA synthetase [Includes: Glutamyl-tRNA synthetase - Homo sapiens (Human)	12	10	12	27	26	24	11.3333	25.6667	2.26471	0.000427502
SYFA_HUMAN	SYFA_HUMAN	Q9Y285	FARSA	Phenylalanyl-tRNA synthetase alpha chain - Homo sapiens (Human)	1	2	1	2	9	11	1.33333	7.33333	5.5	0.000771954
SYFB_HUMAN	SYFB_HUMAN	Q9NSD9	FARSB	Phenylalanyl-tRNA synthetase beta chain - Homo sapiens (Human)	2	1	0.9	3	9	9	1.3	7	5.38462	0.000899932
SYG_HUMAN	SYG_HUMAN	P41250	GARS	Glycyl-tRNA synthetase - Homo sapiens (Human)	4	6	7	23	16	18	5.66667	19	3.35294	0.000238257
SYK_HUMAN	SYK_HUMAN	Q15046	KARS	Lysyl-tRNA synthetase - Homo sapiens (Human)	7	2	4	16	12	15	4.33333	14.3333	3.30769	0.000427502
SYTC_HUMAN	SYTC_HUMAN	P26639	TARS	Threonyl-tRNA synthetase, cytoplasmic - Homo sapiens (Human)	7	6	4	20	15	17	5.66667	17.3333	3.05882	0.000366236
SYYC_HUMAN	SYYC_HUMAN	P54577	YARS	Tyrosyl-tRNA synthetase, cytoplasmic - Homo sapiens (Human)	7	4	4	15	14	12	5	13.6667	2.73333	0.000980259
TB182_HUMAN	TB182_HUMAN	Q9C0C2	TNKS1BP1	182 kDa tankyrase 1-binding protein - Homo sapiens (Human)	0.9	0.9	0.9	7	8	8	0.9	7.66667	8.51852	0.000393465
TBB5_HUMAN	TBB5_HUMAN	P07437	TUBB	Tubulin beta chain - Homo sapiens (Human)	15	30	24	28	53	63	23	48	2.08696	0.000168822
TCPA_HUMAN	TCPA_HUMAN	P17987	CCT1	T-complex protein 1 subunit alpha - Homo sapiens (Human)	6	7	10	33	28	25	7.66667	28.6667	3.73913	5.99e-05
TCPB_HUMAN	TCPB_HUMAN	P78371	CCT2	T-complex protein 1 subunit beta - Homo sapiens (Human)	13	12	12	43	48	46	12.3333	45.6667	3.7027	1.77e-05
TCPE_HUMAN	TCPE_HUMAN	P48643	CCT5	T-complex protein 1 subunit epsilon - Homo sapiens (Human)	5	8	5	15	22	26	6	21	3.5	0.000170184
TCPQ_HUMAN	TCPQ_HUMAN	P50990	CCT8	T-complex protein 1 subunit theta - Homo sapiens (Human)	11	12	9	22	29	24	10.6667	25	2.34375	0.000405718
TCPZ_HUMAN	TCPZ_HUMAN	P40227	CCT6A	T-complex protein 1 subunit zeta - Homo sapiens (Human)	8	7	10	26	23	23	8.33333	24	2.88	0.000216474
TERA_HUMAN	TERA_HUMAN	P55072	VCP	Transitional endoplasmic reticulum ATPase - Homo sapiens (Human)	17	15	17	32	40	30	16.3333	34	2.08163	0.00036079
TFR1_HUMAN	TFR1_HUMAN	P02786	TFRC	Transferrin receptor protein 1 - Homo sapiens (Human)	0.9	0.9	0.9	17	29	32	0.9	26	28.8889	5.45e-06
TGM2_HUMAN	TGM2_HUMAN	P21980	TGM2	Protein-glutamine gamma-glutamyltransferase 2 - Homo sapiens (Human)	0.9	0.9	0.9	9	10	13	0.9	10.6667	11.8519	0.000133424
TIM44_HUMAN	TIM44_HUMAN	O43615	TIMM44	Import inner membrane translocase subunit TIM44, mitochondrial precursor - Homo sapiens (Human)	2	2	1	10	5	9	1.66667	8	4.8	0.000781484
TLN1_HUMAN	TLN1_HUMAN	Q9Y490	TLN1	Talin-1 - Homo sapiens (Human)	75	77	75	51	54	54	75.6667	53	0.700441	0.000894486
TOP2A_HUMAN	TOP2A_HUMAN	P11388	TOP2A	DNA topoisomerase 2-alpha - Homo sapiens (Human)	1	2	1	10	11	15	1.33333	12	9	0.000121171
TPIS_HUMAN	TPIS_HUMAN	P60174	TPI1	Triosephosphate isomerase - Homo sapiens (Human)	17	1	33	34	59	15	17	36	2.11765	0.000281824
TPM4_HUMAN	TPM4_HUMAN	P67936	TPM4	Tropomyosin alpha-4 chain - Homo sapiens (Human)	16	4	16	0.9	0.9	0.9	12	0.9	0.075	7.76e-05
TPR_HUMAN	TPR_HUMAN	P12270	TPR	Nucleoprotein TPR - Homo sapiens (Human)	16	6	4	28	28	22	8.66667	26	3	0.000168822
TRAP1_HUMAN	TRAP1_HUMAN	Q12931	TRAP1	Heat shock protein 75 kDa, mitochondrial precursor - Homo sapiens (Human)	2	0.9	1	20	18	22	1.3	20	15.3846	1.77e-05
TRXR1_HUMAN	TRXR1_HUMAN	Q16881	TXNRD1	Thioredoxin reductase 1, cytoplasmic precursor - Homo sapiens (Human)	3	3	5	16	11	9	3.66667	12	3.27273	0.000770592
TTL12_HUMAN	TTL12_HUMAN	Q14166	TTLL12	Tubulin--tyrosine ligase-like protein 12 - Homo sapiens (Human)	0.9	0.9	0.9	9	23	13	0.9	15	16.6667	3.81e-05
TYPH_HUMAN	TYPH_HUMAN	P19971	TYMP	Thymidine phosphorylase precursor - Homo sapiens (Human)	1	5	2	6	11	14	2.66667	10.3333	3.875	0.000688904
TYRP1_HUMAN	TYRP1_HUMAN	P17643	TYRP1	5,6-dihydroxyindole-2-carboxylic acid oxidase precursor - Homo sapiens (Human)	24	25	39	0.9	0.9	0.9	29.3333	0.9	0.0306818	0
U2AF2_HUMAN	U2AF2_HUMAN	P26368	U2AF2	Splicing factor U2AF 65 kDa subunit - Homo sapiens (Human)	2	1	0.9	8	10	8	1.3	8.66667	6.66667	0.000383935
U520_HUMAN	U520_HUMAN	O75643	SNRNP200	U5 small nuclear ribonucleoprotein 200 kDa helicase - Homo sapiens (Human)	4	9	5	34	33	24	6	30.3333	5.05556	3.13e-05
UAP1_HUMAN	UAP1_HUMAN	Q16222	UAP1	UDP-N-acetylhexosamine pyrophosphorylase - Homo sapiens (Human)	2	0.9	2	11	9	10	1.63333	10	6.12245	0.000311777
UBP14_HUMAN	UBP14_HUMAN	P54578	USP14	Ubiquitin carboxyl-terminal hydrolase 14 - Homo sapiens (Human)	3	3	2	8	11	15	2.66667	11.3333	4.25	0.00041661
UBP2L_HUMAN	UBP2L_HUMAN	Q14157	UBAP2L	Ubiquitin-associated protein 2-like - Homo sapiens (Human)	0.9	0.9	0.9	4	5	10	0.9	6.33333	7.03704	0.000834581
VAT1_HUMAN	VAT1_HUMAN	Q99536	VAT1	Synaptic vesicle membrane protein VAT-1 homolog - Homo sapiens (Human)	28	31	32	9	7	8	30.3333	8	0.263736	5.85e-05
VATB1_HUMAN	VATB1_HUMAN	P15313	ATP6V1B1	Vacuolar ATP synthase subunit B, kidney isoform - Homo sapiens (Human)	2	12	12	2	1	2	8.66667	1.66667	0.192308	0.0004629
VATB2_HUMAN	VATB2_HUMAN	P21281	ATP6V1B2	Vacuolar ATP synthase subunit B, brain isoform - Homo sapiens (Human)	9	33	14	4	5	3	18.6667	4	0.214286	9.39e-05
VIME_HUMAN	VIME_HUMAN	P08670	VIM	Vimentin - Homo sapiens (Human)	99	122	113	65	85	95	111.333	81.6667	0.733533	0.00066712
VP26A_HUMAN	VP26A_HUMAN	O75436	VPS26A	Vacuolar protein sorting-associated protein 26A - Homo sapiens (Human)	8	10	8	1	1	1	8.66667	1	0.115385	0.000254595
VPP1_HUMAN	VPP1_HUMAN	Q93050	ATP6V0A1	Vacuolar proton translocating ATPase 116 kDa subunit a isoform 1 - Homo sapiens (Human)	14	14	19	0.9	2	1	15.6667	1.3	0.0829787	3.95e-05
XPO5_HUMAN	XPO5_HUMAN	Q9HAV4	XPO5	Exportin-5 - Homo sapiens (Human)	2	1	1	17	12	19	1.33333	16	12	4.49e-05
ZUBR1_HUMAN	UBR4_HUMAN	Q5T4S7	UBR4	Zinc finger UBR1-type protein 1 - Homo sapiens (Human)	1	4	3	16	20	23	2.66667	19.6667	7.375	4.49e-05

## Sheet: ctl_39_DEP.001
2007_id	2009_id	accession	gene	desc	ctl-a	ctl-b	ctl-c	39-a	39-b	39-c	mean(ctl)	mean(39)	ratio(39/ctl)	pValue		FDR =	0.931875	%
1433E_HUMAN	1433E_HUMAN	P62258	YWHAE	14-3-3 protein epsilon - Homo sapiens (Human)	28	26	22	6	4	7	25.3333	5.66667	0.223684	5.90208e-05
1433T_HUMAN	1433T_HUMAN	P27348	YWHAQ	14-3-3 protein theta - Homo sapiens (Human)	9	0.9	16	0.9	3	1	8.63333	1.63333	0.189189	0.00045607
1433Z_HUMAN	1433Z_HUMAN	P63104	YWHAZ	14-3-3 protein zeta/delta - Homo sapiens (Human)	50	8	21	2	14	11	26.3333	9	0.341772	0.000148893
A2MG_HUMAN	A2MG_HUMAN	P01023	A2M	Alpha-2-macroglobulin precursor - Homo sapiens (Human)	1	2	2	21	29	22	1.66667	24	14.4	1.34138e-05
A3KMH1_HUMAN	K0564_HUMAN	A3KMH1	KIAA0564	KIAA0564 protein - Homo sapiens (Human)	1	1	0.9	24	28	2	0.966667	18	18.6207	2.01207e-05
A6NI71_HUMAN	HP1B3_HUMAN	A6NI71	HP1BP3	Uncharacterized protein HP1BP3 - Homo sapiens (Human)	4	2	6	19	5	14	4	12.6667	3.16667	0.000724346
A7E298_HUMAN	PDPR_HUMAN	A7E298	PDPR	Pyruvate dehydrogenase phosphatase regulatory subunit - Homo sapiens (Human)	2	2	0.9	12	10	9	1.63333	10.3333	6.32653	0.000266935
AATM_HUMAN	AATM_HUMAN	P00505	GOT2	Aspartate aminotransferase, mitochondrial precursor - Homo sapiens (Human)	2	8	9	30	35	38	6.33333	34.3333	5.42105	1.7438e-05
ABCD1_HUMAN	ABCD1_HUMAN	P33897	ABCD1	ATP-binding cassette sub-family D member 1 - Homo sapiens (Human)	2	0.9	0.9	11	9	10	1.26667	10	7.89474	0.000226693
ABCD3_HUMAN	ABCD3_HUMAN	P28288	ABCD3	ATP-binding cassette sub-family D member 3 - Homo sapiens (Human)	0.9	0.9	0.9	8	15	8	0.9	10.3333	11.4815	0.000158283
ACADM_HUMAN	ACADM_HUMAN	P11310	ACADM	Medium-chain specific acyl-CoA dehydrogenase, mitochondrial precursor - Homo sapiens (Human)	1	5	2	14	14	10	2.66667	12.6667	4.75	0.000265594
ACADV_HUMAN	ACADV_HUMAN	P49748	ACADVL	Very long-chain specific acyl-CoA dehydrogenase, mitochondrial precursor - Homo sapiens (Human)	12	14	12	29	40	27	12.6667	32	2.52632	0.000167673
ACDSB_HUMAN	ACDSB_HUMAN	P45954	ACADSB	Short/branched chain specific acyl-CoA dehydrogenase, mitochondrial precursor - Homo sapiens (Human)	2	1	1	9	8	9	1.33333	8.66667	6.5	0.00037827
ACON_HUMAN	ACON_HUMAN	Q99798	ACO2	Aconitate hydratase, mitochondrial precursor - Homo sapiens (Human)	12	15	16	77	63	76	14.3333	72	5.02326	1.34138e-06
ACOT1_HUMAN	ACOT1_HUMAN	Q86TX2	ACOT1	Acyl-coenzyme A thioesterase 1 - Homo sapiens (Human)	1	0.9	1	7	7	14	0.966667	9.33333	9.65517	0.000183769
ACOT9_HUMAN	ACOT9_HUMAN	Q9Y305	ACOT9	Acyl-coenzyme A thioesterase 9 - Homo sapiens (Human)	1	1	5	11	9	13	2.33333	11	4.71429	0.000360832
ACOX1_HUMAN	ACOX1_HUMAN	Q15067	ACOX1	Acyl-coenzyme A oxidase 1, peroxisomal - Homo sapiens (Human)	0.9	0.9	0.9	7	9	11	0.9	9	10	0.000226693
ACSL1_HUMAN	ACSL1_HUMAN	P33121	ACSL1	Long-chain-fatty-acid--CoA ligase 1 - Homo sapiens (Human)	5	8	5	20	18	23	6	20.3333	3.38889	0.000179745
ACTA_HUMAN	ACTA_HUMAN	P62736	ACTA2	Actin, aortic smooth muscle - Homo sapiens (Human)	53	50	64	32	42	36	55.6667	36.6667	0.658683	0.000977867
ADRO_HUMAN	ADRO_HUMAN	P22570	FDXR	NADPH:adrenodoxin oxidoreductase, mitochondrial precursor - Homo sapiens (Human)	1	2	4	10	6	13	2.33333	9.66667	4.14286	0.000678739
ADT1_HUMAN	ADT1_HUMAN	P12235	SLC25A4	ADP/ATP translocase 1 - Homo sapiens (Human)	15	13	17	37	38	36	15	37	2.46667	0.000140845
AFG32_HUMAN	AFG32_HUMAN	Q9Y4W6	AFG3L2	AFG3-like protein 2 - Homo sapiens (Human)	7	3	7	15	21	12	5.66667	16	2.82353	0.000596915
AHNK_HUMAN	AHNK_HUMAN	Q09666	AHNAK	Neuroblast differentiation-associated protein AHNAK - Homo sapiens (Human)	245	270	234	13	8	19	249.667	13.3333	0.0534045	0
AIFM1_HUMAN	AIFM1_HUMAN	O95831	AIFM1	Apoptosis-inducing factor 1, mitochondrial precursor - Homo sapiens (Human)	10	8	8	24	20	16	8.66667	20	2.30769	0.000763246
AL1B1_HUMAN	AL1B1_HUMAN	P30837	ALDH1B1	Aldehyde dehydrogenase X, mitochondrial precursor - Homo sapiens (Human)	0.9	0.9	0.9	8	9	9	0.9	8.66667	9.62963	0.000256204
AL4A1_HUMAN	AL4A1_HUMAN	P30038	ALDH4A1	Delta-1-pyrroline-5-carboxylate dehydrogenase, mitochondrial precursor - Homo sapiens (Human)	2	3	1	14	12	14	2	13.3333	6.66667	0.000140845
ANXA2_HUMAN	ANXA2_HUMAN	P07355	ANXA2	Annexin A2 - Homo sapiens (Human)	58	65	62	18	12	12	61.6667	14	0.227027	1.34138e-06
ANXA5_HUMAN	ANXA5_HUMAN	P08758	ANXA5	Annexin A5 - Homo sapiens (Human)	48	46	54	21	15	12	49.3333	16	0.324324	2.8169e-05
ANXA6_HUMAN	ANXA6_HUMAN	P08133	ANXA6	Annexin A6 - Homo sapiens (Human)	26	28	36	13	10	11	30	11.3333	0.377778	0.000150235
APOD_HUMAN	APOD_HUMAN	P05090	APOD	Apolipoprotein D precursor - Homo sapiens (Human)	0.9	0.9	0.9	2	7	10	0.9	6.33333	7.03704	0.000820926
AT131_HUMAN	AT131_HUMAN	Q9HD20	ATP13A1	Probable cation-transporting ATPase 13A1 - Homo sapiens (Human)	2	1	1	10	13	7	1.33333	10	7.5	0.000226693
AT1A1_HUMAN	AT1A1_HUMAN	P05023	ATP1A1	Sodium/potassium-transporting ATPase subunit alpha-1 precursor - Homo sapiens (Human)	29	39	35	65	69	41	34.3333	58.3333	1.69903	0.000355466
AT2A1_HUMAN	AT2A1_HUMAN	O14983	ATP2A1	Sarcoplasmic/endoplasmic reticulum calcium ATPase 1 - Homo sapiens (Human)	8	14	12	28	25	22	11.3333	25	2.20588	0.000481556
AT2A2_HUMAN	AT2A2_HUMAN	P16615	ATP2A2	Sarcoplasmic/endoplasmic reticulum calcium ATPase 2 - Homo sapiens (Human)	9	6	7	34	29	20	7.33333	27.6667	3.77273	5.90208e-05
ATD3A_HUMAN	ATD3A_HUMAN	Q9NVI7	ATAD3A	ATPase family AAA domain-containing protein 3A - Homo sapiens (Human)	6	5	5	21	20	22	5.33333	21	3.9375	0.000128773
ATM_HUMAN	ATM_HUMAN	Q13315	ATM	Serine-protein kinase ATM - Homo sapiens (Human)	1	2	2	18	16	16	1.66667	16.6667	10	4.42656e-05
ATP5H_HUMAN	ATP5H_HUMAN	O75947	ATP5H	ATP synthase D chain, mitochondrial - Homo sapiens (Human)	2	5	5	13	14	13	4	13.3333	3.33333	0.000480215
ATPA_HUMAN	ATPA_HUMAN	P25705	ATP5A1	ATP synthase subunit alpha, mitochondrial precursor - Homo sapiens (Human)	28	30	31	89	103	73	29.6667	88.3333	2.97753	5.36553e-06
ATPB_HUMAN	ATPB_HUMAN	P06576	ATP5B	ATP synthase subunit beta, mitochondrial precursor - Homo sapiens (Human)	43	41	45	109	96	111	43	105.333	2.44961	5.36553e-06
ATPO_HUMAN	ATPO_HUMAN	P48047	ATP5O	ATP synthase subunit O, mitochondrial precursor - Homo sapiens (Human)	10	10	7	17	27	30	9	24.6667	2.74074	0.000236083
BCS1_HUMAN	BCS1_HUMAN	Q9Y276	BCS1L	Mitochondrial chaperone BCS1 - Homo sapiens (Human)	2	1	2	10	6	7	1.66667	7.66667	4.6	0.000922871
BPHL_HUMAN	BPHL_HUMAN	Q86WA6	BPHL	Valacyclovir hydrolase precursor - Homo sapiens (Human)	0.9	0.9	0.9	0.9	23	4	0.9	9.3	10.3333	0.000183769
C1QBP_HUMAN	C1QBP_HUMAN	Q07021	C1QBP	Complement component 1 Q subcomponent-binding protein, mitochondrial precursor - Homo sapiens (Human)	2	0.9	2	5	12	13	1.63333	10	6.12245	0.000307176
CALX_HUMAN	CALX_HUMAN	P27824	CANX	Calnexin precursor - Homo sapiens (Human)	10	10	8	20	26	41	9.33333	29	3.10714	9.52381e-05
CAN1_HUMAN	CAN1_HUMAN	P07384	CAPN1	Calpain-1 catalytic subunit - Homo sapiens (Human)	12	12	7	1	3	2	10.3333	2	0.193548	0.000332663
CAPZB_HUMAN	CAPZB_HUMAN	P47756	CAPZB	F-actin-capping protein subunit beta - Homo sapiens (Human)	11	14	14	2	2	2	13	2	0.153846	0.000144869
CATB_HUMAN	CATB_HUMAN	P07858	CTSB	Cathepsin B precursor - Homo sapiens (Human)	4	2	9	39	95	83	5	72.3333	14.4667	0
CCD51_HUMAN	CCD51_HUMAN	Q96ER9	CCDC51	Coiled-coil domain-containing protein 51 - Homo sapiens (Human)	0.9	0.9	0.9	6	8	5	0.9	6.33333	7.03704	0.000820926
CD44_HUMAN	CD44_HUMAN	P16070	CD44	CD44 antigen precursor - Homo sapiens (Human)	26	28	27	7	8	17	27	10.6667	0.395062	0.000226693
CH60_HUMAN	CH60_HUMAN	P10809	HSPD1	60 kDa heat shock protein, mitochondrial precursor - Homo sapiens (Human)	35	32	33	121	97	110	33.3333	109.333	3.28	1.34138e-06
CLH1_HUMAN	CLH1_HUMAN	Q00610	CLTC	Clathrin heavy chain 1 - Homo sapiens (Human)	80	83	60	49	60	21	74.3333	43.3333	0.58296	0.000162307
CLPX_HUMAN	CLPX_HUMAN	O76031	CLPX	ATP-dependent Clp protease ATP-binding subunit clpX-like, mitochondrial precursor - Homo sapiens (Human)	0.9	1	1	6	11	8	0.966667	8.33333	8.62069	0.000292421
CMC1_HUMAN	CMC1_HUMAN	O75746	SLC25A12	Calcium-binding mitochondrial carrier protein Aralar1 - Homo sapiens (Human)	3	3	2	11	7	15	2.66667	11	4.125	0.000445339
CMC2_HUMAN	CMC2_HUMAN	Q9UJS0	SLC25A13	Calcium-binding mitochondrial carrier protein Aralar2 - Homo sapiens (Human)	4	8	7	21	19	20	6.33333	20	3.15789	0.000245473
CORO7_HUMAN	CORO7_HUMAN	P57737	CORO7	Coronin-7 - Homo sapiens (Human)	8	6	4	0.9	0.9	0.9	6	0.9	0.15	0.00094165
CP51A_HUMAN	CP51A_HUMAN	Q16850	CYP51A1	Cytochrome P450 51A1 - Homo sapiens (Human)	3	2	2	13	6	10	2.33333	9.66667	4.14286	0.000678739
CPSM_HUMAN	CPSM_HUMAN	P31327	CPS1	Carbamoyl-phosphate synthase [ammonia], mitochondrial precursor - Homo sapiens (Human)	0.9	0.9	0.9	17	15	12	0.9	14.6667	16.2963	4.42656e-05
CRYL1_HUMAN	CRYL1_HUMAN	Q9Y2S2	CRYL1	Lambda-crystallin homolog - Homo sapiens (Human)	4	9	9	0.9	0.9	0.9	7.33333	0.9	0.122727	0.000409121
CSPG4_HUMAN	CSPG4_HUMAN	Q6UVK1	CSPG4	Chondroitin sulfate proteoglycan 4 precursor - Homo sapiens (Human)	3	7	3	20	27	15	4.33333	20.6667	4.76923	8.04829e-05
CUL3_HUMAN	CUL3_HUMAN	Q13618	CUL3	Cullin-3 - Homo sapiens (Human)	0.9	0.9	0.9	12	3	4	0.9	6.33333	7.03704	0.000820926
DCTN1_HUMAN	DCTN1_HUMAN	Q14203	DCTN1	Dynactin subunit 1 - Homo sapiens (Human)	17	13	16	4	4	4	15.3333	4	0.26087	0.000253521
DCTN2_HUMAN	DCTN2_HUMAN	Q13561	DCTN2	Dynactin subunit 2 - Homo sapiens (Human)	8	4	7	1	1	1	6.33333	1	0.157895	0.000743125
DDB1_HUMAN	DDB1_HUMAN	Q16531	DDB1	DNA damage-binding protein 1 - Homo sapiens (Human)	3	5	1	7	16	18	3	13.6667	4.55556	0.000245473
DDX18_HUMAN	DDX18_HUMAN	Q9NVP1	DDX18	ATP-dependent RNA helicase DDX18 - Homo sapiens (Human)	0.9	0.9	0.9	11	3	5	0.9	6.33333	7.03704	0.000820926
DDX21_HUMAN	DDX21_HUMAN	Q9NR30	DDX21	Nucleolar RNA helicase 2 - Homo sapiens (Human)	0.9	0.9	0.9	8	8	5	0.9	7	7.77778	0.000501677
DDX5_HUMAN	DDX5_HUMAN	P17844	DDX5	Probable ATP-dependent RNA helicase DDX5 - Homo sapiens (Human)	1	1	1	6	12	9	1	9	9	0.000226693
DDX54_HUMAN	DDX54_HUMAN	Q8TDD1	DDX54	ATP-dependent RNA helicase DDX54 - Homo sapiens (Human)	0.9	0.9	0.9	5	8	7	0.9	6.66667	7.40741	0.00068947
DECR_HUMAN	DECR_HUMAN	Q16698	DECR1	2,4-dienoyl-CoA reductase, mitochondrial precursor - Homo sapiens (Human)	5	4	5	15	20	14	4.66667	16.3333	3.5	0.000292421
DHB12_HUMAN	DHB12_HUMAN	Q53GQ0	HSD17B12	Estradiol 17-beta-dehydrogenase 12 - Homo sapiens (Human)	4	5	6	14	13	16	5	14.3333	2.86667	0.000748491
DHB4_HUMAN	DHB4_HUMAN	P51659	HSD17B4	Peroxisomal multifunctional enzyme type 2 - Homo sapiens (Human)	4	7	8	22	20	21	6.33333	21	3.31579	0.000179745
DHE3_HUMAN	DHE3_HUMAN	P00367	GLUD1	Glutamate dehydrogenase 1, mitochondrial precursor - Homo sapiens (Human)	12	9	10	29	22	37	10.3333	29.3333	2.83871	0.000158283
DHRS8_HUMAN	DHB11_HUMAN	Q8NBQ5	HSD17B11	Dehydrogenase/reductase SDR family member 8 precursor - Homo sapiens (Human)	0.9	0.9	0.9	8	11	7	0.9	8.66667	9.62963	0.000256204
DHSA_HUMAN	DHSA_HUMAN	P31040	SDHA	Succinate dehydrogenase [ubiquinone] flavoprotein subunit, mitochondrial precursor - Homo sapiens (Human)	8	6	10	28	27	27	8	27.3333	3.41667	8.04829e-05
DHX15_HUMAN	DHX15_HUMAN	O43143	DHX15	Putative pre-mRNA-splicing factor ATP-dependent RNA helicase DHX15 - Homo sapiens (Human)	8	4	8	24	26	21	6.66667	23.6667	3.55	0.000119383
DHX30_HUMAN	DHX30_HUMAN	Q7L2E3	DHX30	Putative ATP-dependent RNA helicase DHX30 - Homo sapiens (Human)	2	1	2	11	22	17	1.66667	16.6667	10	4.42656e-05
DHX9_HUMAN	DHX9_HUMAN	Q08211	DHX9	ATP-dependent RNA helicase A - Homo sapiens (Human)	17	12	12	45	34	32	13.6667	37	2.70732	9.1214e-05
DPP2_HUMAN	DPP2_HUMAN	Q9UHL4	DPP7	Dipeptidyl-peptidase 2 precursor - Homo sapiens (Human)	2	3	2	9	8	12	2.33333	9.66667	4.14286	0.000678739
DPP4_HUMAN	DPP4_HUMAN	P27487	DPP4	Dipeptidyl peptidase 4 - Homo sapiens (Human)	31	25	19	0.9	0.9	0.9	25	0.9	0.036	1.34138e-06
DPYL2_HUMAN	DPYL2_HUMAN	Q16555	DPYSL2	Dihydropyrimidinase-related protein 2 - Homo sapiens (Human)	10	13	14	0.9	2	1	12.3333	1.3	0.105405	8.71898e-05
DSRAD_HUMAN	DSRAD_HUMAN	P55265	ADAR	Double-stranded RNA-specific adenosine deaminase - Homo sapiens (Human)	1	0.9	1	6	11	12	0.966667	9.66667	10	0.000167673
DYHC_HUMAN	DYHC1_HUMAN	Q14204	DYNC1H1	Dynein heavy chain, cytosolic - Homo sapiens (Human)	167	186	149	53	50	47	167.333	50	0.298805	0
ECH1_HUMAN	ECH1_HUMAN	Q13011	ECH1	Delta(3,5)-Delta(2,4)-dienoyl-CoA isomerase, mitochondrial precursor - Homo sapiens (Human)	1	2	3	28	22	20	2	23.3333	11.6667	1.7438e-05
ECHA_HUMAN	ECHA_HUMAN	P40939	HADHA	Trifunctional enzyme subunit alpha, mitochondrial precursor - Homo sapiens (Human)	25	28	29	134	96	95	27.3333	108.333	3.96341	0
ECHB_HUMAN	ECHB_HUMAN	P55084	HADHB	Trifunctional enzyme subunit beta, mitochondrial precursor - Homo sapiens (Human)	12	6	12	59	60	64	10	61	6.1	1.34138e-06
EF1A1_HUMAN	EF1A1_HUMAN	P68104	EEF1A1	Elongation factor 1-alpha 1 - Homo sapiens (Human)	58	46	50	30	35	28	51.3333	31	0.603896	0.000535211
EFG1_HUMAN	EFGM_HUMAN	Q96RP9	GFM1	Elongation factor G 1, mitochondrial precursor - Homo sapiens (Human)	1	2	0.9	21	18	22	1.3	20.3333	15.641	1.7438e-05
EFG2_HUMAN	RRF2M_HUMAN	Q969S9	GFM2	Elongation factor G 2, mitochondrial precursor - Homo sapiens (Human)	0.9	0.9	0.9	6	8	5	0.9	6.33333	7.03704	0.000820926
EHD1_HUMAN	EHD1_HUMAN	Q9H4M9	EHD1	EH domain-containing protein 1 - Homo sapiens (Human)	6	5	8	0.9	0.9	0.9	6.33333	0.9	0.142105	0.000743125
EMD_HUMAN	EMD_HUMAN	P50402	EMD	Emerin - Homo sapiens (Human)	3	2	3	13	15	3	2.66667	10.3333	3.875	0.000678739
ENOG_HUMAN	ENOG_HUMAN	P09104	ENO2	Gamma-enolase - Homo sapiens (Human)	8	9	8	2	2	1	8.33333	1.66667	0.2	0.000586184
ENPL_HUMAN	ENPL_HUMAN	P14625	HSP90B1	Endoplasmin precursor - Homo sapiens (Human)	27	33	28	62	53	48	29.3333	54.3333	1.85227	0.000236083
FA62A_HUMAN	ESYT1_HUMAN	Q9BSJ8	ESYT1	Protein FAM62A - Homo sapiens (Human)	9	9	12	34	31	30	10	31.6667	3.16667	8.04829e-05
FA62B_HUMAN	ESYT2_HUMAN	A0FGR8	ESYT2	Protein FAM62B - Homo sapiens (Human)	4	0.9	0.9	17	13	14	1.93333	14.6667	7.58621	8.04829e-05
FABD_HUMAN	FABD_HUMAN	Q8IVS2	MCAT	Malonyl CoA-acyl carrier protein transacylase, mitochondrial precursor - Homo sapiens (Human)	0.9	0.9	0.9	5	12	5	0.9	7.33333	8.14815	0.000429242
FAKD2_HUMAN	FAKD2_HUMAN	Q9NYY8	FASTKD2	FAST kinase domain-containing protein 2 - Homo sapiens (Human)	0.9	0.9	0.9	11	10	9	0.9	10	11.1111	0.000166331
FAS_HUMAN	FAS_HUMAN	P49327	FASN	Fatty acid synthase - Homo sapiens (Human)	61	69	57	114	112	62	62.3333	96	1.54011	0.000245473
FBRL_HUMAN	FBRL_HUMAN	P22087	FBL	rRNA 2'-O-methyltransferase fibrillarin - Homo sapiens (Human)	2	2	1	8	8	7	1.66667	7.66667	4.6	0.000922871
FUMH_HUMAN	FUMH_HUMAN	P07954	FH	Fumarate hydratase, mitochondrial precursor - Homo sapiens (Human)	9	5	7	30	21	62	7	37.6667	5.38095	1.7438e-05
G3P_HUMAN	G3P_HUMAN	P04406	GAPDH	Glyceraldehyde-3-phosphate dehydrogenase - Homo sapiens (Human)	34	44	33	79	76	86	37	80.3333	2.17117	3.75587e-05
G6PI_HUMAN	G6PI_HUMAN	P06744	GPI	Glucose-6-phosphate isomerase - Homo sapiens (Human)	16	11	17	54	34	44	14.6667	44	3	4.42656e-05
GCS1_HUMAN	MOGS_HUMAN	Q13724	MOGS	Mannosyl-oligosaccharide glucosidase - Homo sapiens (Human)	1	1	3	9	8	6	1.66667	7.66667	4.6	0.000922871
GELS_HUMAN	GELS_HUMAN	P06396	GSN	Gelsolin precursor - Homo sapiens (Human)	43	48	44	10	13	17	45	13.3333	0.296296	2.8169e-05
GLSK_HUMAN	GLSK_HUMAN	O94925	GLS	Glutaminase kidney isoform, mitochondrial precursor - Homo sapiens (Human)	0.9	0.9	0.9	12	11	13	0.9	12	13.3333	8.04829e-05
GLYM_HUMAN	GLYM_HUMAN	P34897	SHMT2	Serine hydroxymethyltransferase, mitochondrial precursor - Homo sapiens (Human)	4	6	6	29	14	21	5.33333	21.3333	4	9.65795e-05
GOGA2_HUMAN	GOGA2_HUMAN	Q08379	GOLGA2	Golgin subfamily A member 2 - Homo sapiens (Human)	0.9	0.9	0.9	9	7	4	0.9	6.66667	7.40741	0.00068947
GOGB1_HUMAN	GOGB1_HUMAN	Q14789	GOLGB1	Golgin subfamily B member 1 - Homo sapiens (Human)	2	3	2	16	22	23	2.33333	20.3333	8.71429	3.75587e-05
GOT1B_HUMAN	GOT1B_HUMAN	Q9Y3E0	GOLT1B	Vesicle transport protein GOT1B - Homo sapiens (Human)	1	2	1	10	10	6	1.33333	8.66667	6.5	0.00037827
GPDM_HUMAN	GPDM_HUMAN	P43304	GPD2	Glycerol-3-phosphate dehydrogenase, mitochondrial precursor - Homo sapiens (Human)	4	7	6	24	20	19	5.66667	21	3.70588	0.000158283
GRP75_HUMAN	GRP75_HUMAN	P38646	HSPA9	Stress-70 protein, mitochondrial precursor - Homo sapiens (Human)	21	31	28	80	53	68	26.6667	67	2.5125	3.08518e-05
GRSF1_HUMAN	GRSF1_HUMAN	Q12849	GRSF1	G-rich sequence factor 1 - Homo sapiens (Human)	0.9	0.9	0.9	9	7	11	0.9	9	10	0.000226693
GSTP1_HUMAN	GSTP1_HUMAN	P09211	GSTP1	Glutathione S-transferase P - Homo sapiens (Human)	31	33	34	3	11	12	32.6667	8.66667	0.265306	3.89001e-05
GTF2I_HUMAN	GTF2I_HUMAN	P78347	GTF2I	General transcription factor II-I - Homo sapiens (Human)	2	2	2	11	8	10	2	9.66667	4.83333	0.000433266
H11_HUMAN	H11_HUMAN	Q02539	HIST1H1A	Histone H1.1 - Homo sapiens (Human)	9	8	10	34	13	16	9	21	2.33333	0.000653253
H15_HUMAN	H15_HUMAN	P16401	HIST1H1B	Histone H1.5 - Homo sapiens (Human)	10	9	4	0.9	0.9	0.9	7.66667	0.9	0.117391	0.000375587
H2A1B_HUMAN	H2A1B_HUMAN	P04908	HIST1H2AB	Histone H2A type 1-B - Homo sapiens (Human)	0.9	0.9	0.9	7	16	10	0.9	11	12.2222	0.000103286
HCD2_HUMAN	HCD2_HUMAN	Q99714	HSD17B10	3-hydroxyacyl-CoA dehydrogenase type-2 - Homo sapiens (Human)	4	0.9	2	2	18	17	2.3	12.3333	5.36232	0.000236083
HEAT1_HUMAN	HEAT1_HUMAN	Q9H583	HEATR1	HEAT repeat-containing protein 1 - Homo sapiens (Human)	0.9	0.9	0.9	12	13	0.9	0.9	8.63333	9.59259	0.000256204
HM13_HUMAN	HM13_HUMAN	Q8TCT9	HM13	Minor histocompatibility antigen H13 - Homo sapiens (Human)	1	1	3	9	11	9	1.66667	9.66667	5.8	0.000355466
HNRPK_HUMAN	HNRPK_HUMAN	P61978	HNRNPK	Heterogeneous nuclear ribonucleoprotein K - Homo sapiens (Human)	51	32	45	15	24	32	42.6667	23.6667	0.554688	0.00041717
HNRPU_HUMAN	HNRPU_HUMAN	Q00839	HNRNPU	Heterogeneous nuclear ribonucleoprotein U - Homo sapiens (Human)	15	17	9	32	30	27	13.6667	29.6667	2.17073	0.000380952
HYEP_HUMAN	HYEP_HUMAN	P07099	EPHX1	Epoxide hydrolase 1 - Homo sapiens (Human)	15	10	7	4	2	1	10.6667	2.33333	0.21875	0.000394366
IDH3B_HUMAN	IDH3B_HUMAN	O43837	IDH3B	Isocitrate dehydrogenase [NAD] subunit beta, mitochondrial precursor - Homo sapiens (Human)	3	2	4	12	14	21	3	15.6667	5.22222	0.000140845
IDHC_HUMAN	IDHC_HUMAN	O75874	IDH1	Isocitrate dehydrogenase [NADP] cytoplasmic - Homo sapiens (Human)	15	13	22	7	5	4	16.6667	5.33333	0.32	0.000367539
ILF3_HUMAN	ILF3_HUMAN	Q12906	ILF3	Interleukin enhancer-binding factor 3 - Homo sapiens (Human)	12	12	13	28	28	25	12.3333	27	2.18919	0.000431925
IMMT_HUMAN	IMMT_HUMAN	Q16891	IMMT	Mitochondrial inner membrane protein - Homo sapiens (Human)	8	9	7	30	30	48	8	36	4.5	2.01207e-05
IPYR2_HUMAN	IPYR2_HUMAN	Q9H2U2	PPA2	Inorganic pyrophosphatase 2, mitochondrial precursor - Homo sapiens (Human)	2	2	1	6	11	9	1.66667	8.66667	5.2	0.000481556
IQGA1_HUMAN	IQGA1_HUMAN	P46940	IQGAP1	Ras GTPase-activating-like protein IQGAP1 - Homo sapiens (Human)	66	53	43	31	33	1	54	21.6667	0.401235	5.6338e-05
ITPR2_HUMAN	ITPR2_HUMAN	Q14571	ITPR2	Inositol 1,4,5-trisphosphate receptor type 2 - Homo sapiens (Human)	0.9	0.9	0.9	9	16	7	0.9	10.6667	11.8519	0.000131455
ITPR3_HUMAN	ITPR3_HUMAN	Q14573	ITPR3	Inositol 1,4,5-trisphosphate receptor type 3 - Homo sapiens (Human)	3	1	0.9	11	7	6	1.63333	8	4.89796	0.000769953
K0090_HUMAN	K0090_HUMAN	Q8N766	KIAA0090	Uncharacterized protein KIAA0090 precursor - Homo sapiens (Human)	1	5	2	15	9	9	2.66667	11	4.125	0.000445339
K1C10_HUMAN	K1C10_HUMAN	P13645	KRT10	Keratin, type I cytoskeletal 10 - Homo sapiens (Human)	82	82	79	0.9	0.9	0.9	81	0.9	0.0111111	0
K1C9_HUMAN	K1C9_HUMAN	P35527	KRT9	Keratin, type I cytoskeletal 9 - Homo sapiens (Human)	41	49	59	0.9	0.9	0.9	49.6667	0.9	0.0181208	0
K22E_HUMAN	K22E_HUMAN	P35908	KRT2	Keratin, type II cytoskeletal 2 epidermal - Homo sapiens (Human)	53	51	61	0.9	0.9	0.9	55	0.9	0.0163636	0
K2C1_HUMAN	K2C1_HUMAN	P04264	KRT1	Keratin, type II cytoskeletal 1 - Homo sapiens (Human)	96	83	82	0.9	0.9	0.9	87	0.9	0.0103448	0
K2C5_HUMAN	K2C5_HUMAN	P13647	KRT5	Keratin, type II cytoskeletal 5 - Homo sapiens (Human)	7	6	11	0.9	0.9	0.9	8	0.9	0.1125	0.000325956
KRT81_HUMAN	KRT81_HUMAN	Q14533	KRT81	Keratin type II cuticular Hb1 - Homo sapiens (Human)	16	17	15	2	3	4	16	3	0.1875	0.000118042
KU70_HUMAN	KU70_HUMAN	P12956	XRCC6	ATP-dependent DNA helicase 2 subunit 1 - Homo sapiens (Human)	10	16	10	33	26	27	12	28.6667	2.38889	0.000277666
LEG1_HUMAN	LEG1_HUMAN	P09382	LGALS1	Galectin-1 - Homo sapiens (Human)	9	11	16	0.9	2	1	12	1.3	0.108333	0.000109993
LEG3_HUMAN	LEG3_HUMAN	P17931	LGALS3	Galectin-3 - Homo sapiens (Human)	20	16	23	3	6	4	19.6667	4.33333	0.220339	8.4507e-05
LETM1_HUMAN	LETM1_HUMAN	O95202	LETM1	Leucine zipper-EF-hand-containing transmembrane protein 1, mitochondrial precursor - Homo sapiens (Human)	5	3	1	23	18	21	3	20.6667	6.88889	4.42656e-05
LMAN1_HUMAN	LMAN1_HUMAN	P49257	LMAN1	Protein ERGIC-53 precursor - Homo sapiens (Human)	0.9	0.9	0.9	5	9	8	0.9	7.33333	8.14815	0.000429242
LMAN2_HUMAN	LMAN2_HUMAN	Q12907	LMAN2	Vesicular integral-membrane protein VIP36 precursor - Homo sapiens (Human)	2	2	1	8	7	8	1.66667	7.66667	4.6	0.000922871
LONM_HUMAN	LONM_HUMAN	P36776	LONP1	Lon protease homolog, mitochondrial precursor - Homo sapiens (Human)	8	5	9	29	26	34	7.33333	29.6667	4.04545	5.09725e-05
LPPRC_HUMAN	LPPRC_HUMAN	P42704	LRPPRC	Leucine-rich PPR motif-containing protein, mitochondrial precursor - Homo sapiens (Human)	20	25	21	65	89	72	22	75.3333	3.42424	5.36553e-06
LYAG_HUMAN	LYAG_HUMAN	P10253	GAA	Lysosomal alpha-glucosidase precursor - Homo sapiens (Human)	1	1	1	17	18	13	1	16	16	3.48759e-05
M2OM_HUMAN	M2OM_HUMAN	Q02978	SLC25A11	Mitochondrial 2-oxoglutarate/malate carrier protein - Homo sapiens (Human)	4	5	4	15	12	11	4.33333	12.6667	2.92308	0.000909457
MA2B1_HUMAN	MA2B1_HUMAN	O00754	MAN2B1	Lysosomal alpha-mannosidase precursor - Homo sapiens (Human)	0.9	1	3	8	12	11	1.63333	10.3333	6.32653	0.000266935
MAOM_HUMAN	MAOM_HUMAN	P23368	ME2	NAD-dependent malic enzyme, mitochondrial precursor - Homo sapiens (Human)	2	0.9	1	11	16	9	1.3	12	9.23077	0.000119383
MAP4_HUMAN	MAP4_HUMAN	P27816	MAP4	Microtubule-associated protein 4 - Homo sapiens (Human)	15	14	5	2	1	0.9	11.3333	1.3	0.114706	0.000144869
MARCS_HUMAN	MARCS_HUMAN	P29966	MARCKS	Myristoylated alanine-rich C-kinase substrate - Homo sapiens (Human)	17	12	10	0.9	0.9	0.9	13	0.9	0.0692308	6.57277e-05
MATR3_HUMAN	MATR3_HUMAN	P43243	MATR3	Matrin-3 - Homo sapiens (Human)	9	15	11	27	24	34	11.6667	28.3333	2.42857	0.000265594
MBB1A_HUMAN	MBB1A_HUMAN	Q9BQG0	MYBBP1A	Myb-binding protein 1A - Homo sapiens (Human)	1	0.9	2	17	18	13	1.3	16	12.3077	4.42656e-05
MCCA_HUMAN	MCCA_HUMAN	Q96RQ3	MCCC1	Methylcrotonoyl-CoA carboxylase subunit alpha, mitochondrial precursor - Homo sapiens (Human)	0.9	0.9	0.9	10	7	7	0.9	8	8.88889	0.000332663
MCCC2_HUMAN	MCCB_HUMAN	Q9HCC0	MCCC2	Methylcrotonoyl-CoA carboxylase beta chain, mitochondrial precursor - Homo sapiens (Human)	0.9	0.9	0.9	23	32	28	0.9	27.6667	30.7407	2.68276e-06
MCM5_HUMAN	MCM5_HUMAN	P33992	MCM5	DNA replication licensing factor MCM5 - Homo sapiens (Human)	0.9	0.9	0.9	8	6	5	0.9	6.33333	7.03704	0.000820926
MDHM_HUMAN	MDHM_HUMAN	P40926	MDH2	Malate dehydrogenase, mitochondrial precursor - Homo sapiens (Human)	11	15	13	68	55	54	13	59	4.53846	5.36553e-06
METK2_HUMAN	METK2_HUMAN	P31153	MAT2A	S-adenosylmethionine synthetase isoform type-2 - Homo sapiens (Human)	9	6	4	0.9	0.9	0.9	6.33333	0.9	0.142105	0.000743125
MMSA_HUMAN	MMSA_HUMAN	Q02252	ALDH6A1	Methylmalonate-semialdehyde dehydrogenase [acylating], mitochondrial precursor - Homo sapiens (Human)	2	0.9	0.9	8	6	8	1.26667	7.33333	5.78947	0.000760563
MOES_HUMAN	MOES_HUMAN	P26038	MSN	Moesin - Homo sapiens (Human)	16	35	23	7	4	10	24.6667	7	0.283784	9.25553e-05
MPCP_HUMAN	MPCP_HUMAN	Q00325	SLC25A3	Phosphate carrier protein, mitochondrial precursor - Homo sapiens (Human)	15	10	15	40	51	30	13.3333	40.3333	3.025	5.36553e-05
MPPA_HUMAN	MPPA_HUMAN	Q10713	PMPCA	Mitochondrial-processing peptidase subunit alpha, mitochondrial precursor - Homo sapiens (Human)	1	1	0.9	8	8	9	0.966667	8.33333	8.62069	0.000292421
MPPB_HUMAN	MPPB_HUMAN	O75439	PMPCB	Mitochondrial-processing peptidase subunit beta, mitochondrial precursor - Homo sapiens (Human)	0.9	4	4	12	7	30	2.96667	16.3333	5.50562	0.000103286
MPRI_HUMAN	MPRI_HUMAN	P11717	IGF2R	Cation-independent mannose-6-phosphate receptor precursor - Homo sapiens (Human)	2	1	1	10	8	3	1.33333	7	5.25	0.000886653
MTCH2_HUMAN	MTCH2_HUMAN	Q9Y6C9	MTCH2	Mitochondrial carrier homolog 2 - Homo sapiens (Human)	3	6	4	18	18	10	4.33333	15.3333	3.53846	0.000327297
MUTA_HUMAN	MUTA_HUMAN	P22033	MUT	Methylmalonyl-CoA mutase, mitochondrial precursor - Homo sapiens (Human)	1	2	1	9	8	7	1.33333	8	6	0.000468142
MVP_HUMAN	MVP_HUMAN	Q14764	MVP	Major vault protein - Homo sapiens (Human)	22	19	19	0.9	0.9	0.9	20	0.9	0.045	1.07311e-05
MY18A_HUMAN	MY18A_HUMAN	Q92614	MYO18A	Myosin-XVIIIa - Homo sapiens (Human)	4	11	7	0.9	3	0.9	7.33333	1.6	0.218182	0.000995305
MYH10_HUMAN	MYH10_HUMAN	P35580	MYH10	Myosin-10 - Homo sapiens (Human)	66	74	62	25	19	2	67.3333	15.3333	0.227723	0
MYH9_HUMAN	MYH9_HUMAN	P35579	MYH9	Myosin-9 - Homo sapiens (Human)	71	84	75	73	61	18	76.6667	50.6667	0.66087	0.000442656
MYO5A_HUMAN	MYO5A_HUMAN	Q9Y4I1	MYO5A	Myosin-Va - Homo sapiens (Human)	28	25	26	11	9	0.9	26.3333	6.96667	0.264557	7.24346e-05
NAGAB_HUMAN	NAGAB_HUMAN	P17050	NAGA	Alpha-N-acetylgalactosaminidase precursor - Homo sapiens (Human)	1	0.9	1	7	9	8	0.966667	8	8.27586	0.000332663
NAGK_HUMAN	NAGK_HUMAN	Q9UJ70	NAGK	N-acetylglucosamine kinase - Homo sapiens (Human)	4	9	6	0.9	0.9	0.9	6.33333	0.9	0.142105	0.000743125
NAMPT_HUMAN	NAMPT_HUMAN	P43490	NAMPT	Nicotinamide phosphoribosyltransferase - Homo sapiens (Human)	2	2	5	19	14	14	3	15.6667	5.22222	0.000140845
NAT10_HUMAN	NAT10_HUMAN	Q9H0A0	NAT10	N-acetyltransferase 10 - Homo sapiens (Human)	0.9	0.9	0.9	9	7	9	0.9	8.33333	9.25926	0.000292421
NCBP1_HUMAN	NCBP1_HUMAN	Q09161	NCBP1	Nuclear cap-binding protein subunit 1 - Homo sapiens (Human)	0.9	0.9	0.9	12	8	9	0.9	9.66667	10.7407	0.000167673
NCKP1_HUMAN	NCKP1_HUMAN	Q9Y2A7	NCKAP1	Nck-associated protein 1 - Homo sapiens (Human)	9	3	6	1	1	1	6	1	0.166667	0.00094165
NDUA9_HUMAN	NDUA9_HUMAN	Q16795	NDUFA9	NADH dehydrogenase [ubiquinone] 1 alpha subcomplex subunit 9, mitochondrial precursor - Homo sapiens (Human)	3	6	7	15	14	17	5.33333	15.3333	2.875	0.000629108
NEST_HUMAN	NEST_HUMAN	P48681	NES	Nestin - Homo sapiens (Human)	9	6	1	23	33	7	5.33333	21	3.9375	0.000128773
NICA_HUMAN	NICA_HUMAN	Q92542	NCSTN	Nicastrin precursor - Homo sapiens (Human)	2	1	2	8	9	12	1.66667	9.66667	5.8	0.000355466
NNTM_HUMAN	NNTM_HUMAN	Q13423	NNT	NAD(P) transhydrogenase, mitochondrial precursor - Homo sapiens (Human)	12	7	9	42	53	40	9.33333	45	4.82143	1.34138e-05
NOL1_HUMAN	NOP2_HUMAN	P46087	NOP2	Putative RNA methyltransferase NOL1 - Homo sapiens (Human)	0.9	0.9	0.9	9	13	15	0.9	12.3333	13.7037	7.64588e-05
NOL5_HUMAN	NOP58_HUMAN	Q9Y2X3	NOP58	Nucleolar protein 5 - Homo sapiens (Human)	3	0.9	5	13	15	11	2.96667	13	4.38202	0.000301811
NOMO1_HUMAN	NOMO1_HUMAN	Q15155	NOMO1	Nodal modulator 1 precursor - Homo sapiens (Human)	4	3	3	22	25	19	3.33333	22	6.6	3.75587e-05
NONO_HUMAN	NONO_HUMAN	Q15233	NONO	Non-POU domain-containing octamer-binding protein - Homo sapiens (Human)	6	6	7	29	22	14	6.33333	21.6667	3.42105	0.000167673
NPC1_HUMAN	NPC1_HUMAN	O15118	NPC1	Niemann-Pick C1 protein precursor - Homo sapiens (Human)	0.9	1	2	15	14	10	1.3	13	10	8.04829e-05
NQO1_HUMAN	NQO1_HUMAN	P15559	NQO1	NAD(P)H dehydrogenase [quinone] 1 - Homo sapiens (Human)	11	11	12	1	2	4	11.3333	2.33333	0.205882	0.000308518
NSUN2_HUMAN	NSUN2_HUMAN	Q08J23	NSUN2	tRNA - Homo sapiens (Human)	2	1	0.9	13	9	12	1.3	11.3333	8.71795	0.000160966
NT5D2_HUMAN	NT5D2_HUMAN	Q9H857	NT5DC2	5'-nucleotidase domain-containing protein 2 - Homo sapiens (Human)	0.9	0.9	0.9	7	6	8	0.9	7	7.77778	0.000501677
NU133_HUMAN	NU133_HUMAN	Q8WUM0	NUP133	Nuclear pore complex protein Nup133 - Homo sapiens (Human)	0.9	0.9	0.9	10	10	9	0.9	9.66667	10.7407	0.000167673
NU155_HUMAN	NU155_HUMAN	O75694	NUP155	Nuclear pore complex protein Nup155 - Homo sapiens (Human)	2	2	0.9	9	17	12	1.63333	12.6667	7.7551	0.000131455
NU160_HUMAN	NU160_HUMAN	Q12769	NUP160	Nuclear pore complex protein Nup160 - Homo sapiens (Human)	1	2	0.9	9	8	13	1.3	10	7.69231	0.000226693
NU205_HUMAN	NU205_HUMAN	Q92621	NUP205	Nuclear pore complex protein Nup205 - Homo sapiens (Human)	6	3	3	29	22	0.9	4	17.3	4.325	0.000166331
NUCL_HUMAN	NUCL_HUMAN	P19338	NCL	Nucleolin - Homo sapiens (Human)	20	13	19	41	44	49	17.3333	44.6667	2.57692	6.17036e-05
NUMA1_HUMAN	NUMA1_HUMAN	Q14980	NUMA1	Nuclear mitotic apparatus protein 1 - Homo sapiens (Human)	4	6	4	19	15	7	4.66667	13.6667	2.92857	0.000760563
NUP93_HUMAN	NUP93_HUMAN	Q8N1F7	NUP93	Nuclear pore complex protein Nup93 - Homo sapiens (Human)	2	3	1	14	9	21	2	14.6667	7.33333	8.04829e-05
NUP98_HUMAN	NUP98_HUMAN	P52948	NUP98	Nuclear pore complex protein Nup98-Nup96 precursor [Contains: Nuclear pore complex protein Nup98 - Homo sapiens (Human)	0.9	0.9	0.9	7	6	7	0.9	6.66667	7.40741	0.00068947
ODO1_HUMAN	ODO1_HUMAN	Q02218	OGDH	2-oxoglutarate dehydrogenase E1 component, mitochondrial precursor - Homo sapiens (Human)	11	8	7	27	19	21	8.66667	22.3333	2.57692	0.000358149
ODP2_HUMAN	ODP2_HUMAN	P10515	DLAT	Dihydrolipoyllysine-residue acetyltransferase component of pyruvate dehydrogenase complex, mitochondrial precursor - Homo sapiens (Human)	1	1	2	11	8	7	1.33333	8.66667	6.5	0.00037827
OPA1_HUMAN	OPA1_HUMAN	O60313	OPA1	Dynamin-like 120 kDa protein, mitochondrial precursor - Homo sapiens (Human)	2	1	3	17	19	22	2	19.3333	9.66667	3.75587e-05
OTUB1_HUMAN	OTUB1_HUMAN	Q96FW1	OTUB1	Ubiquitin thioesterase OTUB1 - Homo sapiens (Human)	8	7	6	0.9	0.9	0.9	7	0.9	0.128571	0.000500335
P4HA1_HUMAN	P4HA1_HUMAN	P13674	P4HA1	Prolyl 4-hydroxylase subunit alpha-1 precursor - Homo sapiens (Human)	2	1	0.9	5	9	7	1.3	7	5.38462	0.000886653
P5CR2_HUMAN	P5CR2_HUMAN	Q96C36	PYCR2	Pyrroline-5-carboxylate reductase 2 - Homo sapiens (Human)	0.9	0.9	0.9	14	11	9	0.9	11.3333	12.5926	9.1214e-05
P5CS_HUMAN	P5CS_HUMAN	P54886	ALDH18A1	Delta-1-pyrroline-5-carboxylate synthetase - Homo sapiens (Human)	4	4	3	26	19	17	3.66667	20.6667	5.63636	5.6338e-05
PARP1_HUMAN	PARP1_HUMAN	P09874	PARP1	Poly [ADP-ribose] polymerase 1 - Homo sapiens (Human)	14	10	10	24	20	30	11.3333	24.6667	2.17647	0.000629108
PDIA4_HUMAN	PDIA4_HUMAN	P13667	PDIA4	Protein disulfide-isomerase A4 precursor - Homo sapiens (Human)	4	4	5	16	15	12	4.33333	14.3333	3.30769	0.000421194
PDK3_HUMAN	PDK3_HUMAN	Q15120	PDK3	[Pyruvate dehydrogenase [lipoamide]] kinase isozyme 3, mitochondrial precursor - Homo sapiens (Human)	0.9	0.9	0.9	12	13	5	0.9	10	11.1111	0.000166331
PDS5A_HUMAN	PDS5A_HUMAN	Q29RF7	PDS5A	Sister chromatid cohesion protein PDS5 homolog A - Homo sapiens (Human)	1	1	1	7	8	8	1	7.66667	7.66667	0.000386318
PELP1_HUMAN	PELP1_HUMAN	Q8IZL8	PELP1	Proline-, glutamic acid- and leucine-rich protein 1 - Homo sapiens (Human)	2	2	0.9	10	10	6	1.63333	8.66667	5.30612	0.000481556
PIR_HUMAN	PIR_HUMAN	O00625	PIR	Pirin - Homo sapiens (Human)	8	16	10	3	1	1	11.3333	1.66667	0.147059	0.000162307
PLEC1_HUMAN	PLEC1_HUMAN	Q15149	PLEC1	Plectin-1 - Homo sapiens (Human)	102	136	93	261	248	188	110.333	232.333	2.10574	0
PLOD3_HUMAN	PLOD3_HUMAN	O60568	PLOD3	Procollagen-lysine,2-oxoglutarate 5-dioxygenase 3 precursor - Homo sapiens (Human)	1	1	2	19	16	13	1.33333	16	12	4.42656e-05
PLST_HUMAN	PLST_HUMAN	P13797	PLS3	Plastin-3 - Homo sapiens (Human)	11	9	5	2	1	1	8.33333	1.33333	0.16	0.00039839
PME17_HUMAN	PME17_HUMAN	P40967	SILV	Melanocyte protein Pmel 17 precursor - Homo sapiens (Human)	43	55	49	10	12	14	49	12	0.244898	9.38967e-06
PMIP_HUMAN	MIPEP_HUMAN	Q99797	MIPEP	Mitochondrial intermediate peptidase, mitochondrial precursor - Homo sapiens (Human)	0.9	0.9	0.9	9	6	9	0.9	8	8.88889	0.000332663
PNPH_HUMAN	PNPH_HUMAN	P00491	NP	Purine nucleoside phosphorylase - Homo sapiens (Human)	9	11	8	0.9	0.9	0.9	9.33333	0.9	0.0964286	0.000183769
PNPT1_HUMAN	PNPT1_HUMAN	Q8TCS8	PNPT1	Polyribonucleotide nucleotidyltransferase 1, mitochondrial precursor - Homo sapiens (Human)	0.9	0.9	0.9	15	22	20	0.9	19	21.1111	1.7438e-05
PON2_HUMAN	PON2_HUMAN	Q15165	PON2	Serum paraoxonase/arylesterase 2 - Homo sapiens (Human)	0.9	0.9	0.9	8	8	4	0.9	6.66667	7.40741	0.00068947
PPCKM_HUMAN	PCKGM_HUMAN	Q16822	PCK2	Phosphoenolpyruvate carboxykinase [GTP], mitochondrial precursor - Homo sapiens (Human)	2	1	2	12	4	9	1.66667	8.33333	5	0.000654594
PRDX2_HUMAN	PRDX2_HUMAN	P32119	PRDX2	Peroxiredoxin-2 - Homo sapiens (Human)	14	11	9	3	3	4	11.3333	3.33333	0.294118	0.000663984
PREP_HUMAN	PREP_HUMAN	Q5JRX3	PITRM1	Presequence protease, mitochondrial precursor - Homo sapiens (Human)	3	3	2	21	17	15	2.66667	17.6667	6.625	5.90208e-05
PRKDC_HUMAN	PRKDC_HUMAN	P78527	PRKDC	DNA-dependent protein kinase catalytic subunit - Homo sapiens (Human)	59	56	48	213	208	187	54.3333	202.667	3.73006	0
PROF1_HUMAN	PROF1_HUMAN	P07737	PFN1	Profilin-1 - Homo sapiens (Human)	21	19	20	0.9	9	9	20	6.3	0.315	0.000226693
PRP8_HUMAN	PRP8_HUMAN	Q6P2Q9	PRPF8	Pre-mRNA-processing-splicing factor 8 - Homo sapiens (Human)	12	11	3	42	34	19	8.66667	31.6667	3.65385	5.36553e-05
PTBP1_HUMAN	PTBP1_HUMAN	P26599	PTBP1	Polypyrimidine tract-binding protein 1 - Homo sapiens (Human)	15	8	10	34	26	26	11	28.6667	2.60606	0.000183769
PTCD3_HUMAN	PTCD3_HUMAN	Q96EY7	PTCD3	Pentatricopeptide repeat-containing protein 3, mitochondrial precursor - Homo sapiens (Human)	1	1	0.9	7	17	6	0.966667	10	10.3448	0.000166331
PTSS1_HUMAN	PTSS1_HUMAN	P48651	PTDSS1	Phosphatidylserine synthase 1 - Homo sapiens (Human)	0.9	0.9	0.9	8	9	5	0.9	7.33333	8.14815	0.000429242
PYC_HUMAN	PYC_HUMAN	P11498	PC	Pyruvate carboxylase, mitochondrial precursor - Homo sapiens (Human)	3	2	1	19	20	17	2	18.6667	9.33333	3.75587e-05
PYGB_HUMAN	PYGB_HUMAN	P11216	PYGB	Glycogen phosphorylase, brain form - Homo sapiens (Human)	21	17	13	10	5	5	17	6.66667	0.392157	0.000663984
PYGL_HUMAN	PYGL_HUMAN	P06737	PYGL	Glycogen phosphorylase, liver form - Homo sapiens (Human)	11	12	6	0.9	0.9	0.9	9.66667	0.9	0.0931034	0.000154259
Q4G176_HUMAN	ACSF3_HUMAN	Q4G176	ACSF3	LOC197322 protein - Homo sapiens (Human)	0.9	2	1	10	14	19	1.3	14.3333	11.0256	5.6338e-05
Q86UY8_HUMAN	NT5D3_HUMAN	Q86UY8	NT5DC3	5'-nucleotidase domain-containing protein 3 - Homo sapiens (Human)	2	1	1	14	6	10	1.33333	10	7.5	0.000226693
Q8NBT8_HUMAN	METL9_HUMAN	Q8NBT8	METTL9	CDNA FLJ90756 fis, clone SKNMC1000004 - Homo sapiens (Human)	0.9	0.9	0.9	6	6	8	0.9	6.66667	7.40741	0.00068947
QCR1_HUMAN	QCR1_HUMAN	P31930	UQCRC1	Cytochrome b-c1 complex subunit 1, mitochondrial precursor - Homo sapiens (Human)	1	4	5	15	29	19	3.33333	21	6.3	4.69484e-05
RAB1A_HUMAN	RAB1A_HUMAN	P62820	RAB1A	Ras-related protein Rab-1A - Homo sapiens (Human)	2	6	8	9	14	22	5.33333	15	2.8125	0.000718981
RAD50_HUMAN	RAD50_HUMAN	Q92878	RAD50	DNA repair protein RAD50 - Homo sapiens (Human)	2	3	3	9	14	16	2.66667	13	4.875	0.000236083
RBM39_HUMAN	RBM39_HUMAN	Q14498	RBM39	RNA-binding protein 39 - Homo sapiens (Human)	1	2	1	10	7	5	1.33333	7.33333	5.5	0.000760563
RBP2_HUMAN	RBP2_HUMAN	P49792	RANBP2	E3 SUMO-protein ligase RanBP2 - Homo sapiens (Human)	2	3	4	23	12	9	3	14.6667	4.88889	0.000175721
RG9D1_HUMAN	MRRP1_HUMAN	Q7L0Y3	RG9MTD1	RNA - Homo sapiens (Human)	0.9	0.9	0.9	7	9	9	0.9	8.33333	9.25926	0.000292421
RHBD2_HUMAN	RHBD2_HUMAN	Q6NTF9	RHBDD2	Rhomboid domain-containing protein 2 - Homo sapiens (Human)	0.9	0.9	0.9	8	8	5	0.9	7	7.77778	0.000501677
RIB2_HUMAN	RPN2_HUMAN	P04844	RPN2	Dolichyl-diphosphooligosaccharide--protein glycosyltransferase 63 kDa subunit precursor - Homo sapiens (Human)	7	7	9	51	37	25	7.66667	37.6667	4.91304	1.7438e-05
RL1D1_HUMAN	RL1D1_HUMAN	O76021	RSL1D1	Ribosomal L1 domain-containing protein 1 - Homo sapiens (Human)	0.9	0.9	0.9	8	7	7	0.9	7.33333	8.14815	0.000429242
RL9_HUMAN	RL9_HUMAN	P32969	RPL9	60S ribosomal protein L9 - Homo sapiens (Human)	1	3	1	2	11	10	1.66667	7.66667	4.6	0.000922871
RM13_HUMAN	RM13_HUMAN	Q9BYD1	MRPL13	39S ribosomal protein L13, mitochondrial - Homo sapiens (Human)	1	1	2	10	6	5	1.33333	7	5.25	0.000886653
RM22_HUMAN	RM22_HUMAN	Q9NWU5	MRPL22	39S ribosomal protein L22, mitochondrial precursor - Homo sapiens (Human)	2	2	0.9	9	7	9	1.63333	8.33333	5.10204	0.000654594
RM44_HUMAN	RM44_HUMAN	Q9H9J2	MRPL44	39S ribosomal protein L44, mitochondrial precursor - Homo sapiens (Human)	0.9	0.9	0.9	6	7	6	0.9	6.33333	7.03704	0.000820926
RNZ2_HUMAN	RNZ2_HUMAN	Q9BQ52	ELAC2	Zinc phosphodiesterase ELAC protein 2 - Homo sapiens (Human)	0.9	0.9	0.9	6	5	8	0.9	6.33333	7.03704	0.000820926
RO60_HUMAN	RO60_HUMAN	P10155	TROVE2	60 kDa SS-A/Ro ribonucleoprotein - Homo sapiens (Human)	4	1	5	12	11	10	3.33333	11	3.3	0.000886653
RPOM_HUMAN	RPOM_HUMAN	O00411	POLRMT	DNA-directed RNA polymerase, mitochondrial precursor - Homo sapiens (Human)	0.9	0.9	0.9	11	9	6	0.9	8.66667	9.62963	0.000256204
RRP12_HUMAN	RRP12_HUMAN	Q5JTH9	RRP12	RRP12-like protein - Homo sapiens (Human)	0.9	0.9	0.9	7	9	9	0.9	8.33333	9.25926	0.000292421
RRP5_HUMAN	RRP5_HUMAN	Q14690	PDCD11	RRP5 protein homolog - Homo sapiens (Human)	0.9	0.9	0.9	16	20	1	0.9	12.3333	13.7037	7.64588e-05
RS15_HUMAN	RS15_HUMAN	P62841	RPS15	40S ribosomal protein S15 - Homo sapiens (Human)	0.9	0.9	0.9	11	6	8	0.9	8.33333	9.25926	0.000292421
RS7_HUMAN	RS7_HUMAN	P62081	RPS7	40S ribosomal protein S7 - Homo sapiens (Human)	2	2	3	5	13	15	2.33333	11	4.71429	0.000360832
RT26_HUMAN	RT26_HUMAN	Q9BYN8	MRPS26	28S ribosomal protein S26, mitochondrial precursor - Homo sapiens (Human)	0.9	1	2	0.9	19	9	1.3	9.63333	7.41026	0.000245473
RT29_HUMAN	RT29_HUMAN	P51398	DAP3	Mitochondrial 28S ribosomal protein S29 - Homo sapiens (Human)	0.9	0.9	0.9	8	6	5	0.9	6.33333	7.03704	0.000820926
RTN4_HUMAN	RTN4_HUMAN	Q9NQC3	RTN4	Reticulon-4 - Homo sapiens (Human)	6	6	6	24	23	17	6	21.3333	3.55556	0.000163649
S10A6_HUMAN	S10A6_HUMAN	P06703	S100A6	Protein S100-A6 - Homo sapiens (Human)	6	19	8	0.9	0.9	0.9	11	0.9	0.0818182	0.000109993
SAM50_HUMAN	SAM50_HUMAN	Q9Y512	SAMM50	Sorting and assembly machinery component 50 homolog - Homo sapiens (Human)	4	0.9	0.9	10	8	7	1.93333	8.33333	4.31034	0.000936284
SAP_HUMAN	SAP_HUMAN	P07602	PSAP	Proactivator polypeptide precursor [Contains: Saposin-A - Homo sapiens (Human)	2	2	2	12	9	6	2	9	4.5	0.000662643
SART3_HUMAN	SART3_HUMAN	Q15020	SART3	Squamous cell carcinoma antigen recognized by T-cells 3 - Homo sapiens (Human)	1	1	0.9	7	10	9	0.966667	8.66667	8.96552	0.000256204
SC22B_HUMAN	SC22B_HUMAN	O75396	SEC22B	Vesicle-trafficking protein SEC22b - Homo sapiens (Human)	16	14	27	4	13	9	19	8.66667	0.45614	0.000993964
SCOT_HUMAN	SCOT1_HUMAN	P55809	OXCT1	Succinyl-CoA:3-ketoacid-coenzyme A transferase 1, mitochondrial precursor - Homo sapiens (Human)	9	9	9	21	24	16	9	20.3333	2.25926	0.000808853
SEP11_HUMAN	SEP11_HUMAN	Q9NVA2	40432	Septin-11 - Homo sapiens (Human)	8	5	5	0.9	0.9	0.9	6	0.9	0.15	0.00094165
SEPT7_HUMAN	SEPT7_HUMAN	Q16181	40428	Septin-7 - Homo sapiens (Human)	10	10	9	1	3	4	9.66667	2.66667	0.275862	0.00081556
SEPT9_HUMAN	SEPT9_HUMAN	Q9UHD8	40430	Septin-9 - Homo sapiens (Human)	6	12	8	1	2	0.9	8.66667	1.3	0.15	0.000360832
SF3B1_HUMAN	SF3B1_HUMAN	O75533	SF3B1	Splicing factor 3B subunit 1 - Homo sapiens (Human)	3	5	3	11	16	14	3.66667	13.6667	3.72727	0.000374245
SF3B2_HUMAN	SF3B2_HUMAN	Q13435	SF3B2	Splicing factor 3B subunit 2 - Homo sapiens (Human)	5	1	1	9	15	10	2.33333	11.3333	4.85714	0.000327297
SF3B3_HUMAN	SF3B3_HUMAN	Q15393	SF3B3	Splicing factor 3B subunit 3 - Homo sapiens (Human)	7	11	6	29	34	27	8	30	3.75	5.6338e-05
SFXN1_HUMAN	SFXN1_HUMAN	Q9H9B4	SFXN1	Sideroflexin-1 - Homo sapiens (Human)	3	2	3	15	20	12	2.66667	15.6667	5.875	9.52381e-05
SMC1A_HUMAN	SMC1A_HUMAN	Q14683	SMC1A	Structural maintenance of chromosomes protein 1A - Homo sapiens (Human)	6	4	5	18	14	10	5	14	2.8	0.000818243
SMC3_HUMAN	SMC3_HUMAN	Q9UQE7	SMC3	Structural maintenance of chromosomes protein 3 - Homo sapiens (Human)	4	7	7	19	24	25	6	22.6667	3.77778	9.52381e-05
SNAA_HUMAN	SNAA_HUMAN	P54920	NAPA	Alpha-soluble NSF attachment protein - Homo sapiens (Human)	21	11	13	0.9	2	6	15	2.96667	0.197778	0.000148893
SPT16_HUMAN	SP16H_HUMAN	Q9Y5B9	SUPT16H	FACT complex subunit SPT16 - Homo sapiens (Human)	4	4	3	14	14	14	3.66667	14	3.81818	0.000327297
SPT5H_HUMAN	SPT5H_HUMAN	O00267	SUPT5H	Transcription elongation factor SPT5 - Homo sapiens (Human)	0.9	0.9	0.9	6	15	9	0.9	10	11.1111	0.000166331
SPTA2_HUMAN	SPTA2_HUMAN	Q13813	SPTAN1	Spectrin alpha chain, brain - Homo sapiens (Human)	113	117	97	79	80	64	109	74.3333	0.681957	0.000300469
STML2_HUMAN	STML2_HUMAN	Q9UJZ1	STOML2	Stomatin-like protein 2 - Homo sapiens (Human)	7	7	9	25	22	13	7.66667	20	2.6087	0.000421194
STOM_HUMAN	STOM_HUMAN	P27105	STOM	Erythrocyte band 7 integral membrane protein - Homo sapiens (Human)	19	13	14	6	3	7	15.3333	5.33333	0.347826	0.000566063
STT3B_HUMAN	STT3B_HUMAN	Q8TCJ2	STT3B	Dolichyl-diphosphooligosaccharide--protein glycosyltransferase subunit STT3B - Homo sapiens (Human)	1	1	2	12	7	9	1.33333	9.33333	7	0.000285714
SYDM_HUMAN	SYDM_HUMAN	Q6PI48	DARS2	Aspartyl-tRNA synthetase, mitochondrial precursor - Homo sapiens (Human)	1	1	0.9	11	7	14	0.966667	10.6667	11.0345	0.000131455
SYIM_HUMAN	SYIM_HUMAN	Q9NSE4	IARS2	Isoleucyl-tRNA synthetase, mitochondrial precursor - Homo sapiens (Human)	6	8	5	18	21	22	6.33333	20.3333	3.21053	0.000226693
SYLM_HUMAN	SYLM_HUMAN	Q15031	LARS2	Probable leucyl-tRNA synthetase, mitochondrial precursor - Homo sapiens (Human)	0.9	0.9	0.9	8	7	5	0.9	6.66667	7.40741	0.00068947
SYMPK_HUMAN	SYMPK_HUMAN	Q92797	SYMPK	Symplekin - Homo sapiens (Human)	0.9	0.9	0.9	4	10	5	0.9	6.33333	7.03704	0.000820926
SYNM_HUMAN	SYNM_HUMAN	Q96I59	NARS2	Probable asparaginyl-tRNA synthetase, mitochondrial precursor - Homo sapiens (Human)	2	1	2	11	9	11	1.66667	10.3333	6.2	0.000266935
SYSM_HUMAN	SYSM_HUMAN	Q9NP81	SARS2	Seryl-tRNA synthetase, mitochondrial precursor - Homo sapiens (Human)	0.9	0.9	0.9	13	14	13	0.9	13.3333	14.8148	5.6338e-05
SYTM_HUMAN	SYTM_HUMAN	Q9BW92	TARS2	Threonyl-tRNA synthetase, mitochondrial precursor - Homo sapiens (Human)	0.9	0.9	0.9	6	7	7	0.9	6.66667	7.40741	0.00068947
TBA1A_HUMAN	TBA1A_HUMAN	Q71U36	TUBA1A	Tubulin alpha-1A chain - Homo sapiens (Human)	52	57	62	32	34	26	57	30.6667	0.538012	0.000202549
TBB1_HUMAN	TBB1_HUMAN	Q9H4B7	TUBB1	Tubulin beta-1 chain - Homo sapiens (Human)	17	9	24	7	7	4	16.6667	6	0.36	0.000461435
TBB2A_HUMAN	TBB2A_HUMAN	Q13885	TUBB2A	Tubulin beta-2A chain - Homo sapiens (Human)	74	60	63	31	28	23	65.6667	27.3333	0.416244	3.35345e-05
TBB2C_HUMAN	TBB2C_HUMAN	P68371	TUBB2C	Tubulin beta-2C chain - Homo sapiens (Human)	35	33	37	12	10	10	35	10.6667	0.304762	5.90208e-05
TBB5_HUMAN	TBB5_HUMAN	P07437	TUBB	Tubulin beta chain - Homo sapiens (Human)	15	30	24	12	13	8	23	11	0.478261	0.000772636
TEX10_HUMAN	TEX10_HUMAN	Q9NXF1	TEX10	Testis-expressed sequence 10 protein - Homo sapiens (Human)	1	0.9	1	8	2	9	0.966667	6.33333	6.55172	0.000820926
TFR1_HUMAN	TFR1_HUMAN	P02786	TFRC	Transferrin receptor protein 1 - Homo sapiens (Human)	0.9	0.9	0.9	25	18	17	0.9	20	22.2222	1.7438e-05
TIM44_HUMAN	TIM44_HUMAN	O43615	TIMM44	Import inner membrane translocase subunit TIM44, mitochondrial precursor - Homo sapiens (Human)	2	2	1	10	7	11	1.66667	9.33333	5.6	0.000397049
TLN1_HUMAN	TLN1_HUMAN	Q9Y490	TLN1	Talin-1 - Homo sapiens (Human)	75	77	75	46	54	18	75.6667	39.3333	0.519824	7.64588e-05
TM14C_HUMAN	TM14C_HUMAN	Q9P0S9	TMEM14C	Transmembrane protein 14C - Homo sapiens (Human)	0.9	0.9	0.9	9	15	8	0.9	10.6667	11.8519	0.000131455
TMED2_HUMAN	TMED2_HUMAN	Q15363	TMED2	Transmembrane emp24 domain-containing protein 2 precursor - Homo sapiens (Human)	3	1	0.9	6	11	7	1.63333	8	4.89796	0.000769953
TMEDA_HUMAN	TMEDA_HUMAN	P49755	TMED10	Transmembrane emp24 domain-containing protein 10 precursor - Homo sapiens (Human)	3	3	2	13	15	12	2.66667	13.3333	5	0.000214621
TMM43_HUMAN	TMM43_HUMAN	Q9BTV4	TMEM43	Transmembrane protein 43 - Homo sapiens (Human)	2	1	1	6	8	7	1.33333	7	5.25	0.000886653
TOM70_HUMAN	TOM70_HUMAN	O94826	TOMM70A	Mitochondrial precursor proteins import receptor - Homo sapiens (Human)	2	1	1	4	9	9	1.33333	7.33333	5.5	0.000760563
TOP2B_HUMAN	TOP2B_HUMAN	Q02880	TOP2B	DNA topoisomerase 2-beta - Homo sapiens (Human)	2	3	1	12	11	2	2	8.33333	4.16667	0.000936284
TPM4_HUMAN	TPM4_HUMAN	P67936	TPM4	Tropomyosin alpha-4 chain - Homo sapiens (Human)	16	4	16	0.9	0.9	0.9	12	0.9	0.075	7.64588e-05
TPR_HUMAN	TPR_HUMAN	P12270	TPR	Nucleoprotein TPR - Homo sapiens (Human)	16	6	4	47	43	31	8.66667	40.3333	4.65385	1.7438e-05
TRAP1_HUMAN	TRAP1_HUMAN	Q12931	TRAP1	Heat shock protein 75 kDa, mitochondrial precursor - Homo sapiens (Human)	2	0.9	1	32	43	26	1.3	33.6667	25.8974	1.34138e-06
TRPV2_HUMAN	TRPV2_HUMAN	Q9Y5S1	TRPV2	Transient receptor potential cation channel subfamily V member 2 - Homo sapiens (Human)	5	5	5	20	13	11	5	14.6667	2.93333	0.000646546
TTL12_HUMAN	TTL12_HUMAN	Q14166	TTLL12	Tubulin--tyrosine ligase-like protein 12 - Homo sapiens (Human)	0.9	0.9	0.9	10	5	8	0.9	7.66667	8.51852	0.000386318
TYRP1_HUMAN	TYRP1_HUMAN	P17643	TYRP1	5,6-dihydroxyindole-2-carboxylic acid oxidase precursor - Homo sapiens (Human)	24	25	39	9	5	9	29.3333	7.66667	0.261364	5.90208e-05
U2AF2_HUMAN	U2AF2_HUMAN	P26368	U2AF2	Splicing factor U2AF 65 kDa subunit - Homo sapiens (Human)	2	1	0.9	8	7	7	1.3	7.33333	5.64103	0.000760563
U520_HUMAN	U520_HUMAN	O75643	SNRNP200	U5 small nuclear ribonucleoprotein 200 kDa helicase - Homo sapiens (Human)	4	9	5	29	29	5	6	21	3.5	0.000167673
UBE2N_HUMAN	UBE2N_HUMAN	P61088	UBE2N	Ubiquitin-conjugating enzyme E2 N - Homo sapiens (Human)	6	8	5	0.9	0.9	0.9	6.33333	0.9	0.142105	0.000743125
UBP2L_HUMAN	UBP2L_HUMAN	Q14157	UBAP2L	Ubiquitin-associated protein 2-like - Homo sapiens (Human)	0.9	0.9	0.9	7	9	10	0.9	8.66667	9.62963	0.000256204
UTP20_HUMAN	UTP20_HUMAN	O75691	UTP20	Small subunit processome component 20 homolog - Homo sapiens (Human)	0.9	0.9	0.9	15	13	15	0.9	14.3333	15.9259	4.42656e-05
UTRO_HUMAN	UTRO_HUMAN	P46939	UTRN	Utrophin - Homo sapiens (Human)	15	5	6	0.9	0.9	0.9	8.66667	0.9	0.103846	0.000249497
VAT1_HUMAN	VAT1_HUMAN	Q99536	VAT1	Synaptic vesicle membrane protein VAT-1 homolog - Homo sapiens (Human)	28	31	32	12	13	7	30.3333	10.6667	0.351648	0.000118042
VATB1_HUMAN	VATB1_HUMAN	P15313	ATP6V1B1	Vacuolar ATP synthase subunit B, kidney isoform - Homo sapiens (Human)	2	12	12	2	3	1	8.66667	2	0.230769	0.000713615
VATB2_HUMAN	VATB2_HUMAN	P21281	ATP6V1B2	Vacuolar ATP synthase subunit B, brain isoform - Homo sapiens (Human)	9	33	14	7	10	5	18.6667	7.33333	0.392857	0.000535211
VDAC1_HUMAN	VDAC1_HUMAN	P21796	VDAC1	Voltage-dependent anion-selective channel protein 1 - Homo sapiens (Human)	22	25	20	52	44	66	22.3333	54	2.41791	5.6338e-05
VIGLN_HUMAN	VIGLN_HUMAN	Q00341	HDLBP	Vigilin - Homo sapiens (Human)	7	6	5	18	16	15	6	16.3333	2.72222	0.000639839
VINC_HUMAN	VINC_HUMAN	P18206	VCL	Vinculin - Homo sapiens (Human)	25	19	16	1	1	9	20	3.66667	0.183333	6.57277e-05
VP26A_HUMAN	VP26A_HUMAN	O75436	VPS26A	Vacuolar protein sorting-associated protein 26A - Homo sapiens (Human)	8	10	8	2	3	2	8.66667	2.33333	0.269231	0.000995305
VPP3_HUMAN	VPP3_HUMAN	Q13488	TCIRG1	Vacuolar proton translocating ATPase 116 kDa subunit a isoform 3 - Homo sapiens (Human)	0.9	1	1	7	7	8	0.966667	7.33333	7.58621	0.000429242
XPP3_HUMAN	XPP3_HUMAN	Q9NQH7	XPNPEP3	Putative Xaa-Pro aminopeptidase 3 - Homo sapiens (Human)	0.9	0.9	0.9	6	6	8	0.9	6.66667	7.40741	0.00068947

## Sheet: ctl_3b_DEP.001
2007_id	2009_id	accession	gene	desc	ctl-a	ctl-b	ctl-c	3b-a	3b-b	3b-c	mean(ctl)	mean(3b)	ratio(3b/ctl)	pValue		FDR =	1.15793	%
2ABA_HUMAN	2ABA_HUMAN	P63151	PPP2R2A	Serine/threonine-protein phosphatase 2A 55 kDa regulatory subunit B alpha isoform - Homo sapiens (Human)	1	1	1	7	12	3	1	7.33333	7.33333	0.000400255
5NTD_HUMAN	5NTD_HUMAN	P21589	NT5E	5'-nucleotidase precursor - Homo sapiens (Human)	0.9	0.9	0.9	11	12	8	0.9	10.3333	11.4815	0.000131294
A6NNF2_HUMAN	TM214_HUMAN	A6NNF2	TMEM214	Uncharacterized protein ENSP00000238788 - Homo sapiens (Human)	0.9	0.9	0.9	6	9	5	0.9	6.66667	7.40741	0.000625876
A6PWC0_HUMAN	N/A	A6PWC0	N/A	GTPase activating protein and VPS9 domains 1 - Homo sapiens (Human)	0.9	1	1	6	9	9	0.966667	8	8.27586	0.000311026
AAAT_HUMAN	AAAT_HUMAN	Q15758	SLC1A5	Neutral amino acid transporter B(0) - Homo sapiens (Human)	0.9	0.9	0.9	14	8	7	0.9	9.66667	10.7407	0.000159337
ABCE1_HUMAN	ABCE1_HUMAN	P61221	ABCE1	ATP-binding cassette sub-family E member 1 - Homo sapiens (Human)	0.9	0.9	0.9	8	7	6	0.9	7	7.77778	0.000456342
ACLY_HUMAN	ACLY_HUMAN	P53396	ACLY	ATP-citrate synthase - Homo sapiens (Human)	18	22	12	27	39	29	17.3333	31.6667	1.82692	0.00090376
ACSL3_HUMAN	ACSL3_HUMAN	O95573	ACSL3	Long-chain-fatty-acid--CoA ligase 3 - Homo sapiens (Human)	5	6	7	26	28	28	6	27.3333	4.55556	4.46144e-05
ACTA_HUMAN	ACTA_HUMAN	P62736	ACTA2	Actin, aortic smooth muscle - Homo sapiens (Human)	53	50	64	34	28	37	55.6667	33	0.592814	0.00037731
ACTN1_HUMAN	ACTN1_HUMAN	P12814	ACTN1	Alpha-actinin-1 - Homo sapiens (Human)	26	38	37	82	69	72	33.6667	74.3333	2.20792	4.2065e-05
ACTN4_HUMAN	ACTN4_HUMAN	O43707	ACTN4	Alpha-actinin-4 - Homo sapiens (Human)	23	20	27	47	42	56	23.3333	48.3333	2.07143	0.000159337
AHNK_HUMAN	AHNK_HUMAN	Q09666	AHNAK	Neuroblast differentiation-associated protein AHNAK - Homo sapiens (Human)	245	270	234	151	140	139	249.667	143.333	0.574099	1.2747e-06
AKA12_HUMAN	AKA12_HUMAN	Q02952	AKAP12	A-kinase anchor protein 12 - Homo sapiens (Human)	7	7	4	53	47	63	6	54.3333	9.05556	0
AL1A3_HUMAN	AL1A3_HUMAN	P47895	ALDH1A3	Aldehyde dehydrogenase 1A3 - Homo sapiens (Human)	0.9	0.9	0.9	34	11	17	0.9	20.6667	22.963	1.40217e-05
ALDOA_HUMAN	ALDOA_HUMAN	P04075	ALDOA	Fructose-bisphosphate aldolase A - Homo sapiens (Human)	16	18	13	50	36	51	15.6667	45.6667	2.91489	4.2065e-05
AMPN_HUMAN	AMPN_HUMAN	P15144	ANPEP	Aminopeptidase N - Homo sapiens (Human)	0.9	0.9	0.9	11	6	5	0.9	7.33333	8.14815	0.000400255
ANXA1_HUMAN	ANXA1_HUMAN	P04083	ANXA1	Annexin A1 - Homo sapiens (Human)	3	1	2	26	16	16	2	19.3333	9.66667	3.31421e-05
ANXA2_HUMAN	ANXA2_HUMAN	P07355	ANXA2	Annexin A2 - Homo sapiens (Human)	58	65	62	29	22	33	61.6667	28	0.454054	6.37349e-05
ANXA5_HUMAN	ANXA5_HUMAN	P08758	ANXA5	Annexin A5 - Homo sapiens (Human)	48	46	54	24	23	29	49.3333	25.3333	0.513514	0.000203952
AP1B1_HUMAN	AP1B1_HUMAN	Q10567	AP1B1	AP-1 complex subunit beta-1 - Homo sapiens (Human)	10	7	9	26	21	20	8.66667	22.3333	2.57692	0.00035819
AP1G1_HUMAN	AP1G1_HUMAN	O43747	AP1G1	AP-1 complex subunit gamma-1 - Homo sapiens (Human)	1	3	3	11	8	8	2.33333	9	3.85714	0.000869344
AP3D1_HUMAN	AP3D1_HUMAN	O14617	AP3D1	AP-3 complex subunit delta-1 - Homo sapiens (Human)	4	2	4	11	12	13	3.33333	12	3.6	0.000521351
ARHG2_HUMAN	ARHG2_HUMAN	Q92974	ARHGEF2	Rho/Rac guanine nucleotide exchange factor 2 - Homo sapiens (Human)	0.9	0.9	0.9	5	7	6	0.9	6	6.66667	0.000907584
ASAH1_HUMAN	ASAH1_HUMAN	Q13510	ASAH1	Acid ceramidase precursor - Homo sapiens (Human)	13	19	19	5	4	5	17	4.66667	0.27451	0.000206501
AT1A1_HUMAN	AT1A1_HUMAN	P05023	ATP1A1	Sodium/potassium-transporting ATPase subunit alpha-1 precursor - Homo sapiens (Human)	29	39	35	71	57	53	34.3333	60.3333	1.75728	0.000261313
BASI_HUMAN	BASI_HUMAN	P35613	BSG	Basigin precursor - Homo sapiens (Human)	2	2	2	6	8	16	2	10	5	0.000376036
BAT3_HUMAN	BAT3_HUMAN	P46379	BAT3	Large proline-rich protein BAT3 - Homo sapiens (Human)	0.9	0.9	0.9	9	7	8	0.9	8	8.88889	0.000311026
BTF3_HUMAN	BTF3_HUMAN	P20290	BTF3	Transcription factor BTF3 - Homo sapiens (Human)	0.9	0.9	0.9	12	10	5	0.9	9	10	0.000203952
BZW1_HUMAN	BZW1_HUMAN	Q7L1Q6	BZW1	Basic leucine zipper and W2 domain-containing protein 1 - Homo sapiens (Human)	0.9	1	1	10	3	6	0.966667	6.33333	6.55172	0.000755895
CAPG_HUMAN	CAPG_HUMAN	P40121	CAPG	Macrophage-capping protein - Homo sapiens (Human)	21	16	8	0.9	0.9	0.9	15	0.9	0.06	3.18674e-05
CATD_HUMAN	CATD_HUMAN	P07339	CTSD	Cathepsin D precursor - Homo sapiens (Human)	70	37	68	14	14	7	58.3333	11.6667	0.2	1.2747e-06
CD109_HUMAN	CD109_HUMAN	Q6YHK3	CD109	CD109 antigen precursor - Homo sapiens (Human)	6	6	5	37	34	26	5.66667	32.3333	5.70588	1.65711e-05
CD44_HUMAN	CD44_HUMAN	P16070	CD44	CD44 antigen precursor - Homo sapiens (Human)	26	28	27	8	6	14	27	9.33333	0.345679	0.000141491
CD63_HUMAN	CD63_HUMAN	P08962	CD63	CD63 antigen - Homo sapiens (Human)	13	17	20	6	1	3	16.6667	3.33333	0.2	0.000110899
CDC2_HUMAN	CDC2_HUMAN	P06493	CDC2	Cell division control protein 2 homolog - Homo sapiens (Human)	2	2	2	10	8	9	2	9	4.5	0.00061058
CH60_HUMAN	CH60_HUMAN	P10809	HSPD1	60 kDa heat shock protein, mitochondrial precursor - Homo sapiens (Human)	35	32	33	57	70	57	33.3333	61.3333	1.84	0.000177183
CKAP4_HUMAN	CKAP4_HUMAN	Q07065	CKAP4	Cytoskeleton-associated protein 4 - Homo sapiens (Human)	3	6	4	22	38	32	4.33333	30.6667	7.07692	1.65711e-05
CKAP5_HUMAN	CKAP5_HUMAN	Q14008	CKAP5	Cytoskeleton-associated protein 5 - Homo sapiens (Human)	4	3	3	16	14	19	3.33333	16.3333	4.9	0.000133843
CLAP1_HUMAN	CLAP1_HUMAN	Q7Z460	CLASP1	CLIP-associating protein 1 - Homo sapiens (Human)	0.9	0.9	0.9	14	17	14	0.9	15	16.6667	3.56915e-05
CLH1_HUMAN	CLH1_HUMAN	Q00610	CLTC	Clathrin heavy chain 1 - Homo sapiens (Human)	80	83	60	117	116	129	74.3333	120.667	1.62332	8.92288e-05
CND1_HUMAN	CND1_HUMAN	Q15021	NCAPD2	Condensin complex subunit 1 - Homo sapiens (Human)	0.9	0.9	0.9	14	12	7	0.9	11	12.2222	9.05035e-05
CNTP1_HUMAN	CNTP1_HUMAN	P78357	CNTNAP1	Contactin-associated protein 1 precursor - Homo sapiens (Human)	0.9	0.9	0.9	6	10	5	0.9	7	7.77778	0.000456342
COCA1_HUMAN	COCA1_HUMAN	Q99715	COL12A1	Collagen alpha-1(XII) chain precursor - Homo sapiens (Human)	0.9	0.9	0.9	14	14	26	0.9	18	20	1.65711e-05
COF1_HUMAN	COF1_HUMAN	P23528	CFL1	Cofilin-1 - Homo sapiens (Human)	6	10	13	18	20	26	9.66667	21.3333	2.2069	0.000789038
COPA_HUMAN	COPA_HUMAN	P53621	COPA	Coatomer subunit alpha - Homo sapiens (Human)	15	16	12	28	30	28	14.3333	28.6667	2	0.000671765
COPB_HUMAN	COPB_HUMAN	P53618	COPB1	Coatomer subunit beta - Homo sapiens (Human)	5	5	5	18	14	14	5	15.3333	3.06667	0.000418101
COPB2_HUMAN	COPB2_HUMAN	P35606	COPB2	Coatomer subunit beta' - Homo sapiens (Human)	6	5	1	20	20	17	4	19	4.75	8.92288e-05
COPD_HUMAN	COPD_HUMAN	P48444	ARCN1	Coatomer subunit delta - Homo sapiens (Human)	1	1	2	8	10	8	1.33333	8.66667	6.5	0.000340344
COPE_HUMAN	COPE_HUMAN	O14579	COPE	Coatomer subunit epsilon - Homo sapiens (Human)	1	3	1	6	9	8	1.66667	7.66667	4.6	0.000857871
COPG_HUMAN	COPG_HUMAN	Q9Y678	COPG	Coatomer subunit gamma - Homo sapiens (Human)	4	2	1	20	18	13	2.33333	17	7.28571	5.35373e-05
CPNE1_HUMAN	CPNE1_HUMAN	Q99829	CPNE1	Copine-1 - Homo sapiens (Human)	2	1	1	13	13	9	1.33333	11.6667	8.75	0.000122371
CPSM_HUMAN	CPSM_HUMAN	P31327	CPS1	Carbamoyl-phosphate synthase [ammonia], mitochondrial precursor - Homo sapiens (Human)	0.9	0.9	0.9	8	6	8	0.9	7.33333	8.14815	0.000400255
CRYL1_HUMAN	CRYL1_HUMAN	Q9Y2S2	CRYL1	Lambda-crystallin homolog - Homo sapiens (Human)	4	9	9	0.9	3	1	7.33333	1.63333	0.222727	0.000920331
CSPG4_HUMAN	CSPG4_HUMAN	Q6UVK1	CSPG4	Chondroitin sulfate proteoglycan 4 precursor - Homo sapiens (Human)	3	7	3	83	80	90	4.33333	84.3333	19.4615	0
CUL3_HUMAN	CUL3_HUMAN	Q13618	CUL3	Cullin-3 - Homo sapiens (Human)	0.9	0.9	0.9	7	6	5	0.9	6	6.66667	0.000907584
DDB1_HUMAN	DDB1_HUMAN	Q16531	DDB1	DNA damage-binding protein 1 - Homo sapiens (Human)	3	5	1	6	13	14	3	11	3.66667	0.000620778
DDX1_HUMAN	DDX1_HUMAN	Q92499	DDX1	ATP-dependent RNA helicase DDX1 - Homo sapiens (Human)	3	3	1	13	13	16	2.33333	14	6	0.000133843
DDX18_HUMAN	DDX18_HUMAN	Q9NVP1	DDX18	ATP-dependent RNA helicase DDX18 - Homo sapiens (Human)	0.9	0.9	0.9	6	6	8	0.9	6.66667	7.40741	0.000625876
DDX21_HUMAN	DDX21_HUMAN	Q9NR30	DDX21	Nucleolar RNA helicase 2 - Homo sapiens (Human)	0.9	0.9	0.9	12	10	15	0.9	12.3333	13.7037	5.86361e-05
DDX3X_HUMAN	DDX3X_HUMAN	O00571	DDX3X	ATP-dependent RNA helicase DDX3X - Homo sapiens (Human)	1	3	3	9	9	14	2.33333	10.6667	4.57143	0.000378585
DHSA_HUMAN	DHSA_HUMAN	P31040	SDHA	Succinate dehydrogenase [ubiquinone] flavoprotein subunit, mitochondrial precursor - Homo sapiens (Human)	8	6	10	0.9	0.9	0.9	8	0.9	0.1125	0.000297004
DHX15_HUMAN	DHX15_HUMAN	O43143	DHX15	Putative pre-mRNA-splicing factor ATP-dependent RNA helicase DHX15 - Homo sapiens (Human)	8	4	8	18	22	15	6.66667	18.3333	2.75	0.000410453
DHX9_HUMAN	DHX9_HUMAN	Q08211	DHX9	ATP-dependent RNA helicase A - Homo sapiens (Human)	17	12	12	35	29	32	13.6667	32	2.34146	0.000224347
DMN_HUMAN	SYNEM_HUMAN	O15061	SYNM	Desmuslin - Homo sapiens (Human)	0.9	0.9	0.9	8	9	11	0.9	9.33333	10.3704	0.000170809
DOCK5_HUMAN	DOCK5_HUMAN	Q9H7D0	DOCK5	Dedicator of cytokinesis protein 5 - Homo sapiens (Human)	1	1	0.9	10	9	7	0.966667	8.66667	8.96552	0.000226896
DPP4_HUMAN	DPP4_HUMAN	P27487	DPP4	Dipeptidyl peptidase 4 - Homo sapiens (Human)	31	25	19	0.9	0.9	0.9	25	0.9	0.036	1.2747e-06
DPYL2_HUMAN	DPYL2_HUMAN	Q16555	DPYSL2	Dihydropyrimidinase-related protein 2 - Homo sapiens (Human)	10	13	14	30	29	22	12.3333	27	2.18919	0.000418101
DYHC_HUMAN	DYHC1_HUMAN	Q14204	DYNC1H1	Dynein heavy chain, cytosolic - Homo sapiens (Human)	167	186	149	108	112	110	167.333	110	0.657371	7.26577e-05
ECM29_HUMAN	ECM29_HUMAN	Q5VYK3	ECM29	Proteasome-associated protein ECM29 homolog - Homo sapiens (Human)	2	1	2	13	6	9	1.66667	9.33333	5.6	0.000369662
EF1A2_HUMAN	EF1A2_HUMAN	Q05639	EEF1A2	Elongation factor 1-alpha 2 - Homo sapiens (Human)	0.9	0.9	0.9	11	15	12	0.9	12.6667	14.0741	5.60867e-05
EF2_HUMAN	EF2_HUMAN	P13639	EEF2	Elongation factor 2 - Homo sapiens (Human)	16	16	23	62	62	48	18.3333	57.3333	3.12727	1.65711e-05
EIF2A_HUMAN	EIF2A_HUMAN	Q9BY44	EIF2A	Eukaryotic translation initiation factor 2A - Homo sapiens (Human)	1	0.9	1	4	7	8	0.966667	6.33333	6.55172	0.000755895
ENOA_HUMAN	ENOA_HUMAN	P06733	ENO1	Alpha-enolase - Homo sapiens (Human)	23	17	22	50	47	61	20.6667	52.6667	2.54839	5.09879e-05
ENPL_HUMAN	ENPL_HUMAN	P14625	HSP90B1	Endoplasmin precursor - Homo sapiens (Human)	27	33	28	64	67	71	29.3333	67.3333	2.29545	4.46144e-05
FA49B_HUMAN	FA49B_HUMAN	Q9NUQ9	FAM49B	Protein FAM49B - Homo sapiens (Human)	1	3	2	10	6	10	2	8.66667	4.33333	0.00071638
FA62A_HUMAN	ESYT1_HUMAN	Q9BSJ8	ESYT1	Protein FAM62A - Homo sapiens (Human)	9	9	12	26	28	28	10	27.3333	2.73333	0.000170809
FA62B_HUMAN	ESYT2_HUMAN	A0FGR8	ESYT2	Protein FAM62B - Homo sapiens (Human)	4	0.9	0.9	14	9	13	1.93333	12	6.2069	0.000177183
FANCI_HUMAN	FANCI_HUMAN	Q9NVI1	FANCI	Fanconi anemia group I protein - Homo sapiens (Human)	0.9	0.9	0.9	9	8	9	0.9	8.66667	9.62963	0.000226896
FAS_HUMAN	FAS_HUMAN	P49327	FASN	Fatty acid synthase - Homo sapiens (Human)	61	69	57	148	129	159	62.3333	145.333	2.33155	5.09879e-06
FINC_HUMAN	FINC_HUMAN	P02751	FN1	Fibronectin precursor - Homo sapiens (Human)	1	1	2	40	29	46	1.33333	38.3333	28.75	0
FKB10_HUMAN	FKB10_HUMAN	Q96AY3	FKBP10	FK506-binding protein 10 precursor - Homo sapiens (Human)	1	1	1	8	4	7	1	6.33333	6.33333	0.000755895
FLII_HUMAN	FLII_HUMAN	Q13045	FLII	Protein flightless-1 homolog - Homo sapiens (Human)	3	7	2	11	17	10	4	12.6667	3.16667	0.000679414
FLNA_HUMAN	FLNA_HUMAN	P21333	FLNA	Filamin-A - Homo sapiens (Human)	124	127	118	78	89	95	123	87.3333	0.710027	0.00035819
FLNB_HUMAN	FLNB_HUMAN	O75369	FLNB	Filamin-B - Homo sapiens (Human)	0.9	1	2	38	35	35	1.3	36	27.6923	0
FLNC_HUMAN	FLNC_HUMAN	Q14315	FLNC	Filamin-C - Homo sapiens (Human)	0.9	0.9	0.9	20	15	20	0.9	18.3333	20.3704	1.65711e-05
FSCN1_HUMAN	FSCN1_HUMAN	Q16658	FSCN1	Fascin - Homo sapiens (Human)	2	0.9	1	15	15	13	1.3	14.3333	11.0256	5.35373e-05
FUBP1_HUMAN	FUBP1_HUMAN	Q96AE4	FUBP1	Far upstream element-binding protein 1 - Homo sapiens (Human)	1	0.9	1	10	8	8	0.966667	8.66667	8.96552	0.000226896
FUBP3_HUMAN	FUBP3_HUMAN	Q96I24	FUBP3	Far upstream element-binding protein 3 - Homo sapiens (Human)	2	1	0.9	15	10	10	1.3	11.6667	8.97436	0.000122371
G3P_HUMAN	G3P_HUMAN	P04406	GAPDH	Glyceraldehyde-3-phosphate dehydrogenase - Homo sapiens (Human)	34	44	33	137	90	88	37	105	2.83784	5.09879e-06
GBF1_HUMAN	GBF1_HUMAN	Q92538	GBF1	Golgi-specific brefeldin A-resistance guanine nucleotide exchange factor 1 - Homo sapiens (Human)	0.9	0.9	0.9	15	11	12	0.9	12.6667	14.0741	5.60867e-05
GCN1L_HUMAN	GCN1L_HUMAN	Q92616	GCN1L1	GCN1-like protein 1 - Homo sapiens (Human)	12	12	15	39	39	40	13	39.3333	3.02564	5.35373e-05
GCS1_HUMAN	MOGS_HUMAN	Q13724	MOGS	Mannosyl-oligosaccharide glucosidase - Homo sapiens (Human)	1	1	3	14	7	9	1.66667	10	6	0.000285532
GDN_HUMAN	GDN_HUMAN	P07093	SERPINE2	Glia-derived nexin precursor - Homo sapiens (Human)	0.9	0.9	0.9	5	4	9	0.9	6	6.66667	0.000907584
GFPT1_HUMAN	GFPT1_HUMAN	Q06210	GFPT1	Glucosamine--fructose-6-phosphate aminotransferase [isomerizing] 1 - Homo sapiens (Human)	0.9	0.9	0.9	12	11	9	0.9	10.6667	11.8519	0.000113448
GLCNE_HUMAN	GLCNE_HUMAN	Q9Y223	GNE	Bifunctional UDP-N-acetylglucosamine 2-epimerase/N-acetylmannosamine kinase - Homo sapiens (Human)	0.9	0.9	0.9	5	6	8	0.9	6.33333	7.03704	0.000755895
GLSK_HUMAN	GLSK_HUMAN	O94925	GLS	Glutaminase kidney isoform, mitochondrial precursor - Homo sapiens (Human)	0.9	0.9	0.9	5	6	7	0.9	6	6.66667	0.000907584
GLU2B_HUMAN	GLU2B_HUMAN	P14314	PRKCSH	Glucosidase 2 subunit beta precursor - Homo sapiens (Human)	4	5	4	6	19	16	4.33333	13.6667	3.15385	0.000565966
GNAI1_HUMAN	GNAI1_HUMAN	P63096	GNAI1	Guanine nucleotide-binding protein G(i), alpha-1 subunit - Homo sapiens (Human)	3	1	2	7	5	18	2	10	5	0.000376036
GOT1B_HUMAN	GOT1B_HUMAN	Q9Y3E0	GOLT1B	Vesicle transport protein GOT1B - Homo sapiens (Human)	1	2	1	7	6	10	1.33333	7.66667	5.75	0.000565966
GPDM_HUMAN	GPDM_HUMAN	P43304	GPD2	Glycerol-3-phosphate dehydrogenase, mitochondrial precursor - Homo sapiens (Human)	4	7	6	19	12	13	5.66667	14.6667	2.58824	0.00098789
GPNMB_HUMAN	GPNMB_HUMAN	Q14956	GPNMB	Transmembrane glycoprotein NMB precursor - Homo sapiens (Human)	22	18	23	0.9	0.9	0.9	21	0.9	0.0428571	6.37349e-06
GRP78_HUMAN	GRP78_HUMAN	P11021	HSPA5	78 kDa glucose-regulated protein precursor - Homo sapiens (Human)	31	36	41	85	94	90	36	89.6667	2.49074	1.65711e-05
GSHB_HUMAN	GSHB_HUMAN	P48637	GSS	Glutathione synthetase - Homo sapiens (Human)	4	0.9	2	12	9	8	2.3	9.66667	4.2029	0.00065392
GTF2I_HUMAN	GTF2I_HUMAN	P78347	GTF2I	General transcription factor II-I - Homo sapiens (Human)	2	2	2	15	17	12	2	14.6667	7.33333	8.413e-05
GTR1_HUMAN	GTR1_HUMAN	P11166	SLC2A1	Solute carrier family 2, facilitated glucose transporter member 1 - Homo sapiens (Human)	0.9	0.9	0.9	6	8	9	0.9	7.66667	8.51852	0.000359465
GUAA_HUMAN	GUAA_HUMAN	P49915	GMPS	GMP synthase [glutamine-hydrolyzing] - Homo sapiens (Human)	1	2	1	8	10	9	1.33333	9	6.75	0.000291906
H15_HUMAN	H15_HUMAN	P16401	HIST1H1B	Histone H1.5 - Homo sapiens (Human)	10	9	4	0.9	0.9	0.9	7.66667	0.9	0.117391	0.000354366
H2A1B_HUMAN	H2A1B_HUMAN	P04908	HIST1H2AB	Histone H2A type 1-B - Homo sapiens (Human)	0.9	0.9	0.9	17	8	15	0.9	13.3333	14.8148	5.35373e-05
HCD2_HUMAN	HCD2_HUMAN	Q99714	HSD17B10	3-hydroxyacyl-CoA dehydrogenase type-2 - Homo sapiens (Human)	4	0.9	2	16	15	9	2.3	13.3333	5.7971	0.000159337
HEAT1_HUMAN	HEAT1_HUMAN	Q9H583	HEATR1	HEAT repeat-containing protein 1 - Homo sapiens (Human)	0.9	0.9	0.9	9	9	4	0.9	7.33333	8.14815	0.000400255
HM13_HUMAN	HM13_HUMAN	Q8TCT9	HM13	Minor histocompatibility antigen H13 - Homo sapiens (Human)	1	1	3	17	18	17	1.66667	17.3333	10.4	3.56915e-05
HNRPK_HUMAN	HNRPK_HUMAN	P61978	HNRNPK	Heterogeneous nuclear ribonucleoprotein K - Homo sapiens (Human)	51	32	45	23	22	15	42.6667	20	0.46875	0.000161887
HNRPQ_HUMAN	HNRPQ_HUMAN	O60506	SYNCRIP	Heterogeneous nuclear ribonucleoprotein Q - Homo sapiens (Human)	8	6	5	24	14	13	6.33333	17	2.68421	0.00056979
HS74L_HUMAN	HS74L_HUMAN	O95757	HSPA4L	Heat shock 70 kDa protein 4L - Homo sapiens (Human)	0.9	0.9	0.9	5	7	7	0.9	6.33333	7.03704	0.000755895
HUWE1_HUMAN	HUWE1_HUMAN	Q7Z6Z7	HUWE1	E3 ubiquitin-protein ligase HUWE1 - Homo sapiens (Human)	6	8	5	23	22	22	6.33333	22.3333	3.52632	0.000133843
HYEP_HUMAN	HYEP_HUMAN	P07099	EPHX1	Epoxide hydrolase 1 - Homo sapiens (Human)	15	10	7	0.9	0.9	0.9	10.6667	0.9	0.084375	0.000104525
ICAM1_HUMAN	ICAM1_HUMAN	P05362	ICAM1	Intercellular adhesion molecule 1 precursor - Homo sapiens (Human)	0.9	0.9	0.9	5	6	8	0.9	6.33333	7.03704	0.000755895
IF2B1_HUMAN	IF2B1_HUMAN	Q9NZI8	IGF2BP1	Insulin-like growth factor 2 mRNA-binding protein 1 - Homo sapiens (Human)	0.9	0.9	0.9	7	9	11	0.9	9	10	0.000203952
IF2B3_HUMAN	IF2B3_HUMAN	O00425	IGF2BP3	Insulin-like growth factor 2 mRNA-binding protein 3 - Homo sapiens (Human)	0.9	0.9	0.9	10	6	9	0.9	8.33333	9.25926	0.000270236
IF2G_HUMAN	IF2G_HUMAN	P41091	EIF2S3	Eukaryotic translation initiation factor 2 subunit 3 - Homo sapiens (Human)	2	1	2	7	14	7	1.66667	9.33333	5.6	0.000369662
IF37_HUMAN	EIF3D_HUMAN	O15371	EIF3D	Eukaryotic translation initiation factor 3 subunit 7 - Homo sapiens (Human)	2	1	2	16	5	7	1.66667	9.33333	5.6	0.000369662
IF39_HUMAN	EIF3B_HUMAN	P55884	EIF3B	Eukaryotic translation initiation factor 3 subunit 9 - Homo sapiens (Human)	3	7	3	17	16	8	4.33333	13.6667	3.15385	0.000565966
IF4A3_HUMAN	IF4A3_HUMAN	P38919	EIF4A3	Eukaryotic initiation factor 4A-III - Homo sapiens (Human)	2	0.9	1	11	5	5	1.3	7	5.38462	0.000801785
IF4G1_HUMAN	IF4G1_HUMAN	Q04637	EIF4G1	Eukaryotic translation initiation factor 4 gamma 1 - Homo sapiens (Human)	4	12	9	15	24	23	8.33333	20.6667	2.48	0.000434672
IMDH2_HUMAN	IMDH2_HUMAN	P12268	IMPDH2	Inosine-5'-monophosphate dehydrogenase 2 - Homo sapiens (Human)	2	2	3	9	11	11	2.33333	10.3333	4.42857	0.000414277
IPO7_HUMAN	IPO7_HUMAN	O95373	IPO7	Importin-7 - Homo sapiens (Human)	3	3	2	17	14	15	2.66667	15.3333	5.75	0.000112173
IPO9_HUMAN	IPO9_HUMAN	Q96P70	IPO9	Importin-9 - Homo sapiens (Human)	4	2	1	11	10	6	2.33333	9	3.85714	0.000869344
IQGA3_HUMAN	IQGA3_HUMAN	Q86VI3	IQGAP3	Ras GTPase-activating-like protein IQGAP3 - Homo sapiens (Human)	0.9	0.9	0.9	11	10	6	0.9	9	10	0.000203952
ITA1_HUMAN	ITA1_HUMAN	P56199	ITGA1	Integrin alpha-1 precursor - Homo sapiens (Human)	0.9	0.9	0.9	9	12	16	0.9	12.3333	13.7037	5.86361e-05
K1C10_HUMAN	K1C10_HUMAN	P13645	KRT10	Keratin, type I cytoskeletal 10 - Homo sapiens (Human)	82	82	79	0.9	0.9	0.9	81	0.9	0.0111111	0
K1C9_HUMAN	K1C9_HUMAN	P35527	KRT9	Keratin, type I cytoskeletal 9 - Homo sapiens (Human)	41	49	59	0.9	0.9	0.9	49.6667	0.9	0.0181208	0
K22E_HUMAN	K22E_HUMAN	P35908	KRT2	Keratin, type II cytoskeletal 2 epidermal - Homo sapiens (Human)	53	51	61	0.9	0.9	0.9	55	0.9	0.0163636	0
K2C1_HUMAN	K2C1_HUMAN	P04264	KRT1	Keratin, type II cytoskeletal 1 - Homo sapiens (Human)	96	83	82	0.9	0.9	0.9	87	0.9	0.0103448	0
K2C5_HUMAN	K2C5_HUMAN	P13647	KRT5	Keratin, type II cytoskeletal 5 - Homo sapiens (Human)	7	6	11	0.9	0.9	0.9	8	0.9	0.1125	0.000297004
KDEL2_HUMAN	KDEL2_HUMAN	Q7Z4H8	KDELC2	KDEL motif-containing protein 2 precursor - Homo sapiens (Human)	0.9	0.9	0.9	6	7	11	0.9	8	8.88889	0.000311026
KPYM_HUMAN	KPYM_HUMAN	P14618	PKM2	Pyruvate kinase isozymes M1/M2 - Homo sapiens (Human)	65	86	74	125	111	96	75	110.667	1.47556	0.000291906
KRT81_HUMAN	KRT81_HUMAN	Q14533	KRT81	Keratin type II cuticular Hb1 - Homo sapiens (Human)	16	17	15	0.9	0.9	0.9	16	0.9	0.05625	2.67686e-05
KU86_HUMAN	KU86_HUMAN	P13010	XRCC5	ATP-dependent DNA helicase 2 subunit 2 - Homo sapiens (Human)	9	10	6	36	31	19	8.33333	28.6667	3.44	7.64818e-05
LAMB1_HUMAN	LAMB1_HUMAN	P07942	LAMB1	Laminin subunit beta-1 precursor - Homo sapiens (Human)	0.9	0.9	0.9	14	14	11	0.9	13	14.4444	5.35373e-05
LAMC1_HUMAN	LAMC1_HUMAN	P11047	LAMC1	Laminin subunit gamma-1 precursor - Homo sapiens (Human)	0.9	0.9	0.9	9	8	11	0.9	9.33333	10.3704	0.000170809
LAP2A_HUMAN	LAP2A_HUMAN	P42166	TMPO	Lamina-associated polypeptide 2 isoform alpha - Homo sapiens (Human)	2	1	4	9	9	9	2.33333	9	3.85714	0.000869344
LAP4_HUMAN	SCRIB_HUMAN	Q14160	SCRIB	Protein LAP4 - Homo sapiens (Human)	0.9	0.9	0.9	4	9	8	0.9	7	7.77778	0.000456342
LARP1_HUMAN	LARP1_HUMAN	Q6PKG0	LARP1	La-related protein 1 - Homo sapiens (Human)	1	2	1	8	7	8	1.33333	7.66667	5.75	0.000565966
LEG3_HUMAN	LEG3_HUMAN	P17931	LGALS3	Galectin-3 - Homo sapiens (Human)	20	16	23	1	3	1	19.6667	1.66667	0.0847458	1.91205e-05
LMAN1_HUMAN	LMAN1_HUMAN	P49257	LMAN1	Protein ERGIC-53 precursor - Homo sapiens (Human)	0.9	0.9	0.9	6	8	9	0.9	7.66667	8.51852	0.000359465
LMNA_HUMAN	LMNA_HUMAN	P02545	LMNA	Lamin-A/C - Homo sapiens (Human)	97	99	81	136	112	122	92.3333	123.333	1.33574	0.000824729
MACF1_HUMAN	MACF1_HUMAN	Q9UPN3	MACF1	Microtubule-actin cross-linking factor 1, isoforms 1/2/3/5 - Homo sapiens (Human)	3	1	1	8	12	14	1.66667	11.3333	6.8	0.000169535
MAGD2_HUMAN	MAGD2_HUMAN	Q9UNF1	MAGED2	Melanoma-associated antigen D2 - Homo sapiens (Human)	0.9	0.9	0.9	11	10	10	0.9	10.3333	11.4815	0.000131294
MAP1B_HUMAN	MAP1B_HUMAN	P46821	MAP1B	Microtubule-associated protein 1B - Homo sapiens (Human)	2	0.9	0.9	12	20	17	1.26667	16.3333	12.8947	3.56915e-05
MARCS_HUMAN	MARCS_HUMAN	P29966	MARCKS	Myristoylated alanine-rich C-kinase substrate - Homo sapiens (Human)	17	12	10	0.9	0.9	0.9	13	0.9	0.0692308	5.60867e-05
MBB1A_HUMAN	MBB1A_HUMAN	Q9BQG0	MYBBP1A	Myb-binding protein 1A - Homo sapiens (Human)	1	0.9	2	10	9	12	1.3	10.3333	7.94872	0.000170809
MDHM_HUMAN	MDHM_HUMAN	P40926	MDH2	Malate dehydrogenase, mitochondrial precursor - Homo sapiens (Human)	11	15	13	29	39	43	13	37	2.84615	7.64818e-05
MPRI_HUMAN	MPRI_HUMAN	P11717	IGF2R	Cation-independent mannose-6-phosphate receptor precursor - Homo sapiens (Human)	2	1	1	14	12	14	1.33333	13.3333	10	5.86361e-05
MSH6_HUMAN	MSH6_HUMAN	P52701	MSH6	DNA mismatch repair protein MSH6 - Homo sapiens (Human)	1	1	0.9	7	8	14	0.966667	9.66667	10	0.000159337
MY18A_HUMAN	MY18A_HUMAN	Q92614	MYO18A	Myosin-XVIIIa - Homo sapiens (Human)	4	11	7	0.9	1	1	7.33333	0.966667	0.131818	0.000381134
MYH10_HUMAN	MYH10_HUMAN	P35580	MYH10	Myosin-10 - Homo sapiens (Human)	66	74	62	36	34	32	67.3333	34	0.50495	8.03059e-05
MYO1D_HUMAN	MYO1D_HUMAN	O94832	MYO1D	Myosin-Id - Homo sapiens (Human)	18	19	17	2	0.9	0.9	18	1.26667	0.0703704	2.67686e-05
MYO5A_HUMAN	MYO5A_HUMAN	Q9Y4I1	MYO5A	Myosin-Va - Homo sapiens (Human)	28	25	26	0.9	0.9	0.9	26.3333	0.9	0.0341772	1.2747e-06
MYOF_HUMAN	MYOF_HUMAN	Q9NZM1	MYOF	Myoferlin - Homo sapiens (Human)	16	13	18	77	60	61	15.6667	66	4.21277	5.09879e-06
NCBP1_HUMAN	NCBP1_HUMAN	Q09161	NCBP1	Nuclear cap-binding protein subunit 1 - Homo sapiens (Human)	0.9	0.9	0.9	11	10	11	0.9	10.6667	11.8519	0.000113448
NDRG1_HUMAN	NDRG1_HUMAN	Q92597	NDRG1	Protein NDRG1 - Homo sapiens (Human)	0.9	0.9	0.9	9	10	8	0.9	9	10	0.000203952
NEST_HUMAN	NEST_HUMAN	P48681	NES	Nestin - Homo sapiens (Human)	9	6	1	74	62	51	5.33333	62.3333	11.6875	0
NNMT_HUMAN	NNMT_HUMAN	P40261	NNMT	Nicotinamide N-methyltransferase - Homo sapiens (Human)	0.9	0.9	0.9	7	7	6	0.9	6.66667	7.40741	0.000625876
NOMO1_HUMAN	NOMO1_HUMAN	Q15155	NOMO1	Nodal modulator 1 precursor - Homo sapiens (Human)	4	3	3	15	13	17	3.33333	15	4.5	0.000192479
NU133_HUMAN	NU133_HUMAN	Q8WUM0	NUP133	Nuclear pore complex protein Nup133 - Homo sapiens (Human)	0.9	0.9	0.9	8	6	4	0.9	6	6.66667	0.000907584
NU205_HUMAN	NU205_HUMAN	Q92621	NUP205	Nuclear pore complex protein Nup205 - Homo sapiens (Human)	6	3	3	15	23	20	4	19.3333	4.83333	8.413e-05
NU214_HUMAN	NU214_HUMAN	P35658	NUP214	Nuclear pore complex protein Nup214 - Homo sapiens (Human)	0.9	0.9	0.9	9	9	6	0.9	8	8.88889	0.000311026
O94935_HUMAN	SAC1_HUMAN	O94935	SACM1L	SAC1 suppressor of actin mutations 1-like protein - Homo sapiens (Human)	5	7	9	2	1	0.9	7	1.3	0.185714	0.000715105
P4HA1_HUMAN	P4HA1_HUMAN	P13674	P4HA1	Prolyl 4-hydroxylase subunit alpha-1 precursor - Homo sapiens (Human)	2	1	0.9	11	7	11	1.3	9.66667	7.4359	0.000224347
P5CS_HUMAN	P5CS_HUMAN	P54886	ALDH18A1	Delta-1-pyrroline-5-carboxylate synthetase - Homo sapiens (Human)	4	4	3	25	14	16	3.66667	18.3333	5	8.92288e-05
PA2G4_HUMAN	PA2G4_HUMAN	Q9UQ80	PA2G4	Proliferation-associated protein 2G4 - Homo sapiens (Human)	15	6	16	1	5	1	12.3333	2.33333	0.189189	0.000203952
PABP1_HUMAN	PABP1_HUMAN	P11940	PABPC1	Polyadenylate-binding protein 1 - Homo sapiens (Human)	11	11	6	25	33	21	9.33333	26.3333	2.82143	0.000169535
PDE1C_HUMAN	PDE1C_HUMAN	Q14123	PDE1C	Calcium/calmodulin-dependent 3',5'-cyclic nucleotide phosphodiesterase 1C - Homo sapiens (Human)	0.9	0.9	0.9	7	4	8	0.9	6.33333	7.03704	0.000755895
PDIA1_HUMAN	PDIA1_HUMAN	P07237	P4HB	Protein disulfide-isomerase precursor - Homo sapiens (Human)	15	13	12	51	48	37	13.3333	45.3333	3.4	2.9318e-05
PDIA4_HUMAN	PDIA4_HUMAN	P13667	PDIA4	Protein disulfide-isomerase A4 precursor - Homo sapiens (Human)	4	4	5	63	40	64	4.33333	55.6667	12.8462	0
PDIA6_HUMAN	PDIA6_HUMAN	Q15084	PDIA6	Protein disulfide-isomerase A6 precursor - Homo sapiens (Human)	15	4	9	22	20	20	9.33333	20.6667	2.21429	0.000824729
PDLI5_HUMAN	PDLI5_HUMAN	Q96HC4	PDLIM5	PDZ and LIM domain protein 5 - Homo sapiens (Human)	0.9	0.9	0.9	5	9	5	0.9	6.33333	7.03704	0.000755895
PICAL_HUMAN	PICAL_HUMAN	Q13492	PICALM	Phosphatidylinositol-binding clathrin assembly protein - Homo sapiens (Human)	0.9	1	2	10	4	7	1.3	7	5.38462	0.000801785
PIR_HUMAN	PIR_HUMAN	O00625	PIR	Pirin - Homo sapiens (Human)	8	16	10	4	2	2	11.3333	2.66667	0.235294	0.00035819
PLCG1_HUMAN	PLCG1_HUMAN	P19174	PLCG1	1-phosphatidylinositol-4,5-bisphosphate phosphodiesterase gamma-1 - Homo sapiens (Human)	2	1	2	10	10	9	1.66667	9.66667	5.8	0.000328872
PLEC1_HUMAN	PLEC1_HUMAN	Q15149	PLEC1	Plectin-1 - Homo sapiens (Human)	102	136	93	334	341	315	110.333	330	2.99094	0
PLOD1_HUMAN	PLOD1_HUMAN	Q02809	PLOD1	Procollagen-lysine,2-oxoglutarate 5-dioxygenase 1 precursor - Homo sapiens (Human)	2	2	2	16	16	21	2	17.6667	8.83333	4.2065e-05
PLOD3_HUMAN	PLOD3_HUMAN	O60568	PLOD3	Procollagen-lysine,2-oxoglutarate 5-dioxygenase 3 precursor - Homo sapiens (Human)	1	1	2	28	18	16	1.33333	20.6667	15.5	1.65711e-05
PME17_HUMAN	PME17_HUMAN	P40967	SILV	Melanocyte protein Pmel 17 precursor - Homo sapiens (Human)	43	55	49	4	5	3	49	4	0.0816327	0
PP1A_HUMAN	PP1A_HUMAN	P62136	PPP1CA	Serine/threonine-protein phosphatase PP1-alpha catalytic subunit - Homo sapiens (Human)	3	4	3	10	12	12	3.33333	11.3333	3.4	0.000712556
PRKDC_HUMAN	PRKDC_HUMAN	P78527	PRKDC	DNA-dependent protein kinase catalytic subunit - Homo sapiens (Human)	59	56	48	116	138	121	54.3333	125	2.30061	5.09879e-06
PSB1_HUMAN	PSB1_HUMAN	P20618	PSMB1	Proteasome subunit beta type-1 precursor - Homo sapiens (Human)	3	6	5	14	15	13	4.66667	14	3	0.000662843
PSMD3_HUMAN	PSMD3_HUMAN	O43242	PSMD3	26S proteasome non-ATPase regulatory subunit 3 - Homo sapiens (Human)	7	3	2	14	14	15	4	14.3333	3.58333	0.000351816
PYGB_HUMAN	PYGB_HUMAN	P11216	PYGB	Glycogen phosphorylase, brain form - Homo sapiens (Human)	21	17	13	33	41	31	17	35	2.05882	0.000351816
PYR1_HUMAN	PYR1_HUMAN	P27708	CAD	CAD protein [Includes: Glutamine-dependent carbamoyl-phosphate synthase - Homo sapiens (Human)	2	2	4	23	27	26	2.66667	25.3333	9.5	1.65711e-05
Q5T663_HUMAN	Q5T663_HUMAN	Q5T663	ITIH5	Inter-alpha - Homo sapiens (Human)	0.9	0.9	0.9	9	5	7	0.9	7	7.77778	0.000456342
Q658Q8_HUMAN	AACS_HUMAN	Q658Q8	AACS	Putative uncharacterized protein DKFZp666F229 - Homo sapiens (Human)	0.9	0.9	0.9	2	7	9	0.9	6	6.66667	0.000907584
Q8NBJ5_HUMAN	GT251_HUMAN	Q8NBJ5	GLT25D1	Glycosyltransferase 25 domain-containing protein 1 - Homo sapiens (Human)	0.9	0.9	4	11	9	8	1.93333	9.33333	4.82759	0.000513703
RAB32_HUMAN	RAB32_HUMAN	Q13637	RAB32	Ras-related protein Rab-32 - Homo sapiens (Human)	15	10	7	2	4	1	10.6667	2.33333	0.21875	0.00035819
RAB7A_HUMAN	RAB7A_HUMAN	P51149	RAB7A	Ras-related protein Rab-7a - Homo sapiens (Human)	23	26	26	13	11	14	25	12.6667	0.506667	0.000873168
RALY_HUMAN	RALY_HUMAN	Q9UKM9	RALY	RNA-binding protein Raly - Homo sapiens (Human)	24	8	9	3	6	3	13.6667	4	0.292683	0.000388783
RB27A_HUMAN	RB27A_HUMAN	P51159	RAB27A	Ras-related protein Rab-27A - Homo sapiens (Human)	8	2	9	0.9	0.9	0.9	6.33333	0.9	0.142105	0.000689611
RBP2_HUMAN	RBP2_HUMAN	P49792	RANBP2	E3 SUMO-protein ligase RanBP2 - Homo sapiens (Human)	2	3	4	8	12	11	3	10.3333	3.44444	0.000842575
RECQ1_HUMAN	RECQ1_HUMAN	P46063	RECQL	ATP-dependent DNA helicase Q1 - Homo sapiens (Human)	3	3	3	7	10	14	3	10.3333	3.44444	0.000842575
RENT1_HUMAN	RENT1_HUMAN	Q92900	UPF1	Regulator of nonsense transcripts 1 - Homo sapiens (Human)	1	0.9	2	15	9	14	1.3	12.6667	9.74359	8.413e-05
RETST_HUMAN	RETST_HUMAN	Q6NUM9	RETSAT	All-trans-retinol 13,14-reductase precursor - Homo sapiens (Human)	8	5	9	0.9	0.9	0.9	7.33333	0.9	0.122727	0.000381134
RGP1_HUMAN	RAGP1_HUMAN	P46060	RANGAP1	Ran GTPase-activating protein 1 - Homo sapiens (Human)	1	2	2	5	11	13	1.66667	9.66667	5.8	0.000328872
RIB1_HUMAN	RPN1_HUMAN	P04843	RPN1	Dolichyl-diphosphooligosaccharide--protein glycosyltransferase 67 kDa subunit precursor - Homo sapiens (Human)	13	18	15	26	44	23	15.3333	31	2.02174	0.000456342
RIB2_HUMAN	RPN2_HUMAN	P04844	RPN2	Dolichyl-diphosphooligosaccharide--protein glycosyltransferase 63 kDa subunit precursor - Homo sapiens (Human)	7	7	9	30	32	27	7.66667	29.6667	3.86957	5.35373e-05
RIR1_HUMAN	RIR1_HUMAN	P23921	RRM1	Ribonucleoside-diphosphate reductase large subunit - Homo sapiens (Human)	0.9	0.9	0.9	6	9	10	0.9	8.33333	9.25926	0.000270236
RL9_HUMAN	RL9_HUMAN	P32969	RPL9	60S ribosomal protein L9 - Homo sapiens (Human)	1	3	1	16	14	13	1.66667	14.3333	8.6	5.86361e-05
RPA1_HUMAN	RPA1_HUMAN	O95602	POLR1A	DNA-directed RNA polymerase I subunit RPA1 - Homo sapiens (Human)	0.9	0.9	0.9	5	5	10	0.9	6.66667	7.40741	0.000625876
RS10_HUMAN	RS10_HUMAN	P46783	RPS10	40S ribosomal protein S10 - Homo sapiens (Human)	3	2	4	13	10	21	3	14.6667	4.88889	0.000166985
RS18_HUMAN	RS18_HUMAN	P62269	RPS18	40S ribosomal protein S18 - Homo sapiens (Human)	22	16	11	10	1	3	16.3333	4.66667	0.285714	0.000256214
RS4X_HUMAN	RS4X_HUMAN	P62701	RPS4X	40S ribosomal protein S4, X isoform - Homo sapiens (Human)	3	3	4	14	14	11	3.33333	13	3.9	0.000355641
RS7_HUMAN	RS7_HUMAN	P62081	RPS7	40S ribosomal protein S7 - Homo sapiens (Human)	2	2	3	14	10	5	2.33333	9.66667	4.14286	0.00065392
S10A4_HUMAN	S10A4_HUMAN	P26447	S100A4	Protein S100-A4 - Homo sapiens (Human)	0.9	0.9	0.9	6	6	8	0.9	6.66667	7.40741	0.000625876
S10A6_HUMAN	S10A6_HUMAN	P06703	S100A6	Protein S100-A6 - Homo sapiens (Human)	6	19	8	3	3	3	11	3	0.272727	0.000565966
S26A2_HUMAN	S26A2_HUMAN	P50443	SLC26A2	Sulfate transporter - Homo sapiens (Human)	0.9	0.9	0.9	12	9	8	0.9	9.66667	10.7407	0.000159337
SC23B_HUMAN	SC23B_HUMAN	Q15437	SEC23B	Protein transport protein Sec23B - Homo sapiens (Human)	0.9	0.9	0.9	7	7	6	0.9	6.66667	7.40741	0.000625876
SC24A_HUMAN	SC24A_HUMAN	O95486	SEC24A	Protein transport protein Sec24A - Homo sapiens (Human)	0.9	0.9	0.9	6	9	12	0.9	9	10	0.000203952
SC31A_HUMAN	SC31A_HUMAN	O94979	SEC31A	Protein transport protein Sec31A - Homo sapiens (Human)	3	2	5	13	13	13	3.33333	13	3.9	0.000355641
SERPH_HUMAN	SERPH_HUMAN	P50454	SERPINH1	Serpin H1 precursor - Homo sapiens (Human)	6	11	14	33	34	37	10.3333	34.6667	3.35484	5.35373e-05
SF3B1_HUMAN	SF3B1_HUMAN	O75533	SF3B1	Splicing factor 3B subunit 1 - Homo sapiens (Human)	3	5	3	13	12	9	3.66667	11.3333	3.09091	0.000976418
SF3B3_HUMAN	SF3B3_HUMAN	Q15393	SF3B3	Splicing factor 3B subunit 3 - Homo sapiens (Human)	7	11	6	26	21	21	8	22.6667	2.83333	0.000242192
SFRS1_HUMAN	SFRS1_HUMAN	Q07955	SFRS1	Splicing factor, arginine/serine-rich 1 - Homo sapiens (Human)	12	7	12	1	3	5	10.3333	3	0.290323	0.000750797
SMC2_HUMAN	SMC2_HUMAN	O95347	SMC2	Structural maintenance of chromosomes protein 2 - Homo sapiens (Human)	2	0.9	1	15	11	6	1.3	10.6667	8.20513	0.000159337
SMC4_HUMAN	SMC4_HUMAN	Q9NTJ3	SMC4	Structural maintenance of chromosomes protein 4 - Homo sapiens (Human)	0.9	0.9	0.9	9	9	9	0.9	9	10	0.000203952
SNAA_HUMAN	SNAA_HUMAN	P54920	NAPA	Alpha-soluble NSF attachment protein - Homo sapiens (Human)	21	11	13	3	4	3	15	3.33333	0.222222	0.000172084
SORT_HUMAN	SORT_HUMAN	Q99523	SORT1	Sortilin precursor - Homo sapiens (Human)	5	8	6	0.9	0.9	0.9	6.33333	0.9	0.142105	0.000689611
SPT16_HUMAN	SP16H_HUMAN	Q9Y5B9	SUPT16H	FACT complex subunit SPT16 - Homo sapiens (Human)	4	4	3	23	20	19	3.66667	20.6667	5.63636	5.35373e-05
SPTA2_HUMAN	SPTA2_HUMAN	Q13813	SPTAN1	Spectrin alpha chain, brain - Homo sapiens (Human)	113	117	97	41	35	49	109	41.6667	0.382263	1.2747e-06
SPTB2_HUMAN	SPTB2_HUMAN	Q01082	SPTBN1	Spectrin beta chain, brain 1 - Homo sapiens (Human)	79	98	64	38	37	30	80.3333	35	0.435685	2.67686e-05
SRRM2_HUMAN	SRRM2_HUMAN	Q9UQ35	SRRM2	Serine/arginine repetitive matrix protein 2 - Homo sapiens (Human)	1	0.9	1	5	7	8	0.966667	6.66667	6.89655	0.000625876
STAT1_HUMAN	STAT1_HUMAN	P42224	STAT1	Signal transducer and activator of transcription 1-alpha/beta - Homo sapiens (Human)	2	0.9	0.9	14	8	6	1.26667	9.33333	7.36842	0.000261313
STAT3_HUMAN	STAT3_HUMAN	P40763	STAT3	Signal transducer and activator of transcription 3 - Homo sapiens (Human)	0.9	0.9	0.9	12	6	2	0.9	6.66667	7.40741	0.000625876
STOM_HUMAN	STOM_HUMAN	P27105	STOM	Erythrocyte band 7 integral membrane protein - Homo sapiens (Human)	19	13	14	3	1	3	15.3333	2.33333	0.152174	7.77565e-05
STX7_HUMAN	STX7_HUMAN	O15400	STX7	Syntaxin-7 - Homo sapiens (Human)	6	9	11	2	3	1	8.66667	2	0.230769	0.000657744
SYCC_HUMAN	SYCC_HUMAN	P49589	CARS	Cysteinyl-tRNA synthetase, cytoplasmic - Homo sapiens (Human)	1	3	0.9	8	18	10	1.63333	12	7.34694	0.000154238
SYEP_HUMAN	SYEP_HUMAN	P07814	EPRS	Bifunctional aminoacyl-tRNA synthetase [Includes: Glutamyl-tRNA synthetase - Homo sapiens (Human)	12	10	12	27	27	24	11.3333	26	2.29412	0.000393881
SYG_HUMAN	SYG_HUMAN	P41250	GARS	Glycyl-tRNA synthetase - Homo sapiens (Human)	4	6	7	21	28	24	5.66667	24.3333	4.29412	5.86361e-05
SYIC_HUMAN	SYIC_HUMAN	P41252	IARS	Isoleucyl-tRNA synthetase, cytoplasmic - Homo sapiens (Human)	7	11	9	17	22	23	9	20.6667	2.2963	0.000712556
SYTC_HUMAN	SYTC_HUMAN	P26639	TARS	Threonyl-tRNA synthetase, cytoplasmic - Homo sapiens (Human)	7	6	4	17	17	15	5.66667	16.3333	2.88235	0.000432122
TBB2C_HUMAN	TBB2C_HUMAN	P68371	TUBB2C	Tubulin beta-2C chain - Homo sapiens (Human)	35	33	37	20	18	15	35	17.6667	0.504762	0.000381134
TCPA_HUMAN	TCPA_HUMAN	P17987	CCT1	T-complex protein 1 subunit alpha - Homo sapiens (Human)	6	7	10	24	17	16	7.66667	19	2.47826	0.00061058
TCPZ_HUMAN	TCPZ_HUMAN	P40227	CCT6A	T-complex protein 1 subunit zeta - Homo sapiens (Human)	8	7	10	22	20	15	8.33333	19	2.28	0.000873168
TENS3_HUMAN	TENS3_HUMAN	Q68CZ2	TNS3	Tensin-3 - Homo sapiens (Human)	0.9	0.9	0.9	17	22	14	0.9	17.6667	19.6296	1.91205e-05
TERA_HUMAN	TERA_HUMAN	P55072	VCP	Transitional endoplasmic reticulum ATPase - Homo sapiens (Human)	17	15	17	37	39	49	16.3333	41.6667	2.55102	8.413e-05
TFR1_HUMAN	TFR1_HUMAN	P02786	TFRC	Transferrin receptor protein 1 - Homo sapiens (Human)	0.9	0.9	0.9	27	35	22	0.9	28	31.1111	1.2747e-06
TGM2_HUMAN	TGM2_HUMAN	P21980	TGM2	Protein-glutamine gamma-glutamyltransferase 2 - Homo sapiens (Human)	0.9	0.9	0.9	14	17	18	0.9	16.3333	18.1481	2.9318e-05
THOC4_HUMAN	THOC4_HUMAN	Q86V81	THOC4	THO complex subunit 4 - Homo sapiens (Human)	0.9	0.9	0.9	8	4	7	0.9	6.33333	7.03704	0.000755895
TIPRL_HUMAN	TIPRL_HUMAN	O75663	TIPRL	TIP41-like protein - Homo sapiens (Human)	0.9	0.9	0.9	5	9	5	0.9	6.33333	7.03704	0.000755895
TM9S4_HUMAN	TM9S4_HUMAN	Q92544	TM9SF4	Transmembrane 9 superfamily protein member 4 - Homo sapiens (Human)	0.9	2	0.9	7	11	8	1.26667	8.66667	6.84211	0.000340344
TMM43_HUMAN	TMM43_HUMAN	Q9BTV4	TMEM43	Transmembrane protein 43 - Homo sapiens (Human)	2	1	1	13	2	6	1.33333	7	5.25	0.000801785
TOP1_HUMAN	TOP1_HUMAN	P11387	TOP1	DNA topoisomerase 1 - Homo sapiens (Human)	0.9	0.9	0.9	4	9	7	0.9	6.66667	7.40741	0.000625876
TPM4_HUMAN	TPM4_HUMAN	P67936	TPM4	Tropomyosin alpha-4 chain - Homo sapiens (Human)	16	4	16	0.9	2	0.9	12	1.26667	0.105556	9.6877e-05
TRAP1_HUMAN	TRAP1_HUMAN	Q12931	TRAP1	Heat shock protein 75 kDa, mitochondrial precursor - Homo sapiens (Human)	2	0.9	1	8	10	12	1.3	10	7.69231	0.000203952
TSPY1_HUMAN	TSPY1_HUMAN	Q01534	TSPY1	Testis-specific Y-encoded protein 1 - Homo sapiens (Human)	0.9	0.9	0.9	13	2	3	0.9	6	6.66667	0.000907584
TTL12_HUMAN	TTL12_HUMAN	Q14166	TTLL12	Tubulin--tyrosine ligase-like protein 12 - Homo sapiens (Human)	0.9	0.9	0.9	6	9	6	0.9	7	7.77778	0.000456342
TYRP1_HUMAN	TYRP1_HUMAN	P17643	TYRP1	5,6-dihydroxyindole-2-carboxylic acid oxidase precursor - Homo sapiens (Human)	24	25	39	0.9	0.9	0.9	29.3333	0.9	0.0306818	0
U520_HUMAN	U520_HUMAN	O75643	SNRNP200	U5 small nuclear ribonucleoprotein 200 kDa helicase - Homo sapiens (Human)	4	9	5	30	34	20	6	28	4.66667	3.56915e-05
UBE1_HUMAN	UBA1_HUMAN	P22314	UBA1	Ubiquitin-activating enzyme E1 - Homo sapiens (Human)	28	27	14	48	42	42	23	44	1.91304	0.000311026
UBE3C_HUMAN	UBE3C_HUMAN	Q15386	UBE3C	Ubiquitin-protein ligase E3C - Homo sapiens (Human)	0.9	0.9	0.9	7	7	7	0.9	7	7.77778	0.000456342
UBP2L_HUMAN	UBP2L_HUMAN	Q14157	UBAP2L	Ubiquitin-associated protein 2-like - Homo sapiens (Human)	0.9	0.9	0.9	10	6	8	0.9	8	8.88889	0.000311026
UGGG1_HUMAN	UGGG1_HUMAN	Q9NYU2	UGCGL1	UDP-glucose:glycoprotein glucosyltransferase 1 precursor - Homo sapiens (Human)	7	8	12	44	36	26	9	35.3333	3.92593	3.56915e-05
VAT1_HUMAN	VAT1_HUMAN	Q99536	VAT1	Synaptic vesicle membrane protein VAT-1 homolog - Homo sapiens (Human)	28	31	32	6	7	4	30.3333	5.66667	0.186813	1.91205e-05
VATE1_HUMAN	VATE1_HUMAN	P36543	ATP6V1E1	Vacuolar ATP synthase subunit E 1 - Homo sapiens (Human)	11	9	14	4	4	2	11.3333	3.33333	0.294118	0.000620778
VIGLN_HUMAN	VIGLN_HUMAN	Q00341	HDLBP	Vigilin - Homo sapiens (Human)	7	6	5	28	29	30	6	29	4.83333	3.56915e-05
VIME_HUMAN	VIME_HUMAN	P08670	VIM	Vimentin - Homo sapiens (Human)	99	122	113	146	181	189	111.333	172	1.54491	5.86361e-05
VP26A_HUMAN	VP26A_HUMAN	O75436	VPS26A	Vacuolar protein sorting-associated protein 26A - Homo sapiens (Human)	8	10	8	4	2	0.9	8.66667	2.3	0.265385	0.000920331
VPP1_HUMAN	VPP1_HUMAN	Q93050	ATP6V0A1	Vacuolar proton translocating ATPase 116 kDa subunit a isoform 1 - Homo sapiens (Human)	14	14	19	5	6	4	15.6667	5	0.319149	0.000376036
XPO1_HUMAN	XPO1_HUMAN	O14980	XPO1	Exportin-1 - Homo sapiens (Human)	8	10	6	29	27	27	8	27.6667	3.45833	7.64818e-05
XPO2_HUMAN	XPO2_HUMAN	P55060	CSE1L	Exportin-2 - Homo sapiens (Human)	5	9	10	42	32	29	8	34.3333	4.29167	2.9318e-05
XPO5_HUMAN	XPO5_HUMAN	Q9HAV4	XPO5	Exportin-5 - Homo sapiens (Human)	2	1	1	8	10	9	1.33333	9	6.75	0.000291906
XPOT_HUMAN	XPOT_HUMAN	O43592	XPOT	Exportin-T - Homo sapiens (Human)	1	0.9	1	2	7	10	0.966667	6.33333	6.55172	0.000755895
ZUBR1_HUMAN	UBR4_HUMAN	Q5T4S7	UBR4	Zinc finger UBR1-type protein 1 - Homo sapiens (Human)	1	4	3	15	6	12	2.66667	11	4.125	0.000414277

## Sheet: ctl_lu_DEP.001
2007_id	2009_id	accession	gene	desc	ctl-a	ctl-b	ctl-c	lu-a	lu-b	lu-c	mean(ctl)	mean(lu)	ratio(lu/ctl)	pValue		FDR =	1.38431	%
2ABA_HUMAN	2ABA_HUMAN	P63151	PPP2R2A	Serine/threonine-protein phosphatase 2A 55 kDa regulatory subunit B alpha isoform - Homo sapiens (Human)	1	1	1	5	10	7	1	7.33333	7.33333	0.000443343
5NTD_HUMAN	5NTD_HUMAN	P21589	NT5E	5'-nucleotidase precursor - Homo sapiens (Human)	0.9	0.9	0.9	23	15	5	0.9	14.3333	15.9259	4.67422e-05
6PGD_HUMAN	6PGD_HUMAN	P52209	PGD	6-phosphogluconate dehydrogenase, decarboxylating - Homo sapiens (Human)	8	7	8	20	12	22	7.66667	18	2.34783	0.000968839
ACSL1_HUMAN	ACSL1_HUMAN	P33121	ACSL1	Long-chain-fatty-acid--CoA ligase 1 - Homo sapiens (Human)	5	8	5	1	1	0.9	6	0.966667	0.161111	0.000939093
ACSL3_HUMAN	ACSL3_HUMAN	O95573	ACSL3	Long-chain-fatty-acid--CoA ligase 3 - Homo sapiens (Human)	5	6	7	33	23	5	6	20.3333	3.38889	0.000196884
ACTB_HUMAN	ACTB_HUMAN	P60709	ACTB	Actin, cytoplasmic 1 - Homo sapiens (Human)	25	28	30	67	45	36	27.6667	49.3333	1.78313	0.000419263
ACTN1_HUMAN	ACTN1_HUMAN	P12814	ACTN1	Alpha-actinin-1 - Homo sapiens (Human)	26	38	37	73	63	51	33.6667	62.3333	1.85149	0.000188385
ACTN4_HUMAN	ACTN4_HUMAN	O43707	ACTN4	Alpha-actinin-4 - Homo sapiens (Human)	23	20	27	34	49	46	23.3333	43	1.84286	0.000447592
AHNK_HUMAN	AHNK_HUMAN	Q09666	AHNAK	Neuroblast differentiation-associated protein AHNAK - Homo sapiens (Human)	245	270	234	155	158	108	249.667	140.333	0.562083	1.41643e-06
AKA12_HUMAN	AKA12_HUMAN	Q02952	AKAP12	A-kinase anchor protein 12 - Homo sapiens (Human)	7	7	4	32	30	25	6	29	4.83333	3.96601e-05
AL1A3_HUMAN	AL1A3_HUMAN	P47895	ALDH1A3	Aldehyde dehydrogenase 1A3 - Homo sapiens (Human)	0.9	0.9	0.9	28	20	33	0.9	27	30	5.66572e-06
AL7A1_HUMAN	AL7A1_HUMAN	P49419	ALDH7A1	Alpha-aminoadipic semialdehyde dehydrogenase - Homo sapiens (Human)	9	4	9	0.9	0.9	0.9	7.33333	0.9	0.122727	0.000419263
ALDOA_HUMAN	ALDOA_HUMAN	P04075	ALDOA	Fructose-bisphosphate aldolase A - Homo sapiens (Human)	16	18	13	31	33	33	15.6667	32.3333	2.06383	0.000443343
ANXA1_HUMAN	ANXA1_HUMAN	P04083	ANXA1	Annexin A1 - Homo sapiens (Human)	3	1	2	24	20	24	2	22.6667	11.3333	1.84136e-05
ANXA5_HUMAN	ANXA5_HUMAN	P08758	ANXA5	Annexin A5 - Homo sapiens (Human)	48	46	54	29	26	29	49.3333	28	0.567568	0.000417847
ANXA6_HUMAN	ANXA6_HUMAN	P08133	ANXA6	Annexin A6 - Homo sapiens (Human)	26	28	36	19	17	0.9	30	12.3	0.41	0.000229462
AP2A2_HUMAN	AP2A2_HUMAN	O94973	AP2A2	AP-2 complex subunit alpha-2 - Homo sapiens (Human)	2	4	1	10	9	10	2.33333	9.66667	4.14286	0.00072238
APOD_HUMAN	APOD_HUMAN	P05090	APOD	Apolipoprotein D precursor - Homo sapiens (Human)	0.9	0.9	0.9	7	7	8	0.9	7.33333	8.14815	0.000443343
ARHG2_HUMAN	ARHG2_HUMAN	Q92974	ARHGEF2	Rho/Rac guanine nucleotide exchange factor 2 - Homo sapiens (Human)	0.9	0.9	0.9	7	8	5	0.9	6.66667	7.40741	0.00067847
ARP2_HUMAN	ARP2_HUMAN	P61160	ACTR2	Actin-related protein 2 - Homo sapiens (Human)	5	6	8	14	11	29	6.33333	18	2.84211	0.000437677
ASAH1_HUMAN	ASAH1_HUMAN	Q13510	ASAH1	Acid ceramidase precursor - Homo sapiens (Human)	13	19	19	3	5	3	17	3.66667	0.215686	0.000134561
ASNS_HUMAN	ASNS_HUMAN	P08243	ASNS	Asparagine synthetase [glutamine-hydrolyzing] - Homo sapiens (Human)	0.9	0.9	0.9	11	7	5	0.9	7.66667	8.51852	0.000398017
ASPH_HUMAN	ASPH_HUMAN	Q12797	ASPH	Aspartyl/asparaginyl beta-hydroxylase - Homo sapiens (Human)	0.9	0.9	0.9	10	11	12	0.9	11	12.2222	9.91501e-05
AT5F1_HUMAN	AT5F1_HUMAN	P24539	ATP5F1	ATP synthase B chain, mitochondrial precursor - Homo sapiens (Human)	17	18	14	4	7	6	16.3333	5.66667	0.346939	0.000449008
BACH_HUMAN	BACH_HUMAN	O00154	ACOT7	Cytosolic acyl coenzyme A thioester hydrolase - Homo sapiens (Human)	8	14	9	26	25	25	10.3333	25.3333	2.45161	0.000365439
BASI_HUMAN	BASI_HUMAN	P35613	BSG	Basigin precursor - Homo sapiens (Human)	2	2	2	13	11	4	2	9.33333	4.66667	0.000562323
CALM_HUMAN	CALM_HUMAN	P62158	CALM1	Calmodulin - Homo sapiens (Human)	0.9	2	1	8	7	6	1.3	7	5.38462	0.000885269
CAP1_HUMAN	CAP1_HUMAN	Q01518	CAP1	Adenylyl cyclase-associated protein 1 - Homo sapiens (Human)	10	8	9	25	28	21	9	24.6667	2.74074	0.000249292
CAPG_HUMAN	CAPG_HUMAN	P40121	CAPG	Macrophage-capping protein - Homo sapiens (Human)	21	16	8	0.9	0.9	0.9	15	0.9	0.06	3.54108e-05
CATB_HUMAN	CATB_HUMAN	P07858	CTSB	Cathepsin B precursor - Homo sapiens (Human)	4	2	9	13	14	15	5	14	2.8	0.000869688
CATD_HUMAN	CATD_HUMAN	P07339	CTSD	Cathepsin D precursor - Homo sapiens (Human)	70	37	68	15	13	15	58.3333	14.3333	0.245714	1.41643e-06
CD109_HUMAN	CD109_HUMAN	Q6YHK3	CD109	CD109 antigen precursor - Homo sapiens (Human)	6	6	5	36	28	2	5.66667	22	3.88235	0.000117564
CD44_HUMAN	CD44_HUMAN	P16070	CD44	CD44 antigen precursor - Homo sapiens (Human)	26	28	27	11	6	3	27	6.66667	0.246914	6.23229e-05
CJ058_HUMAN	CJ058_HUMAN	Q9BRX8	C10orf58	Uncharacterized protein C10orf58 precursor - Homo sapiens (Human)	4	5	11	0.9	0.9	0.9	6.66667	0.9	0.135	0.000624646
CKAP4_HUMAN	CKAP4_HUMAN	Q07065	CKAP4	Cytoskeleton-associated protein 4 - Homo sapiens (Human)	3	6	4	30	40	6	4.33333	25.3333	5.84615	3.96601e-05
CLAP1_HUMAN	CLAP1_HUMAN	Q7Z460	CLASP1	CLIP-associating protein 1 - Homo sapiens (Human)	0.9	0.9	0.9	12	11	0.9	0.9	7.96667	8.85185	0.000327195
CLIC4_HUMAN	CLIC4_HUMAN	Q9Y696	CLIC4	Chloride intracellular channel protein 4 - Homo sapiens (Human)	5	0.9	3	7	36	8	2.96667	17	5.73034	9.34844e-05
CNTP1_HUMAN	CNTP1_HUMAN	P78357	CNTNAP1	Contactin-associated protein 1 precursor - Homo sapiens (Human)	0.9	0.9	0.9	12	8	0.9	0.9	6.96667	7.74074	0.00048017
COF1_HUMAN	COF1_HUMAN	P23528	CFL1	Cofilin-1 - Homo sapiens (Human)	6	10	13	32	14	20	9.66667	22	2.27586	0.000736544
COPB_HUMAN	COPB_HUMAN	P53618	COPB1	Coatomer subunit beta - Homo sapiens (Human)	5	5	5	21	13	31	5	21.6667	4.33333	9.34844e-05
COPB2_HUMAN	COPB2_HUMAN	P35606	COPB2	Coatomer subunit beta' - Homo sapiens (Human)	6	5	1	16	27	19	4	20.6667	5.16667	6.51558e-05
COPD_HUMAN	COPD_HUMAN	P48444	ARCN1	Coatomer subunit delta - Homo sapiens (Human)	1	1	2	14	10	7	1.33333	10.3333	7.75	0.000188385
COPG_HUMAN	COPG_HUMAN	Q9Y678	COPG	Coatomer subunit gamma - Homo sapiens (Human)	4	2	1	20	14	16	2.33333	16.6667	7.14286	6.51558e-05
CRYL1_HUMAN	CRYL1_HUMAN	Q9Y2S2	CRYL1	Lambda-crystallin homolog - Homo sapiens (Human)	4	9	9	0.9	0.9	0.9	7.33333	0.9	0.122727	0.000419263
CSN5_HUMAN	CSN5_HUMAN	Q92905	COPS5	COP9 signalosome complex subunit 5 - Homo sapiens (Human)	7	12	3	1	0.9	3	7.33333	1.63333	0.222727	0.000997167
CSPG4_HUMAN	CSPG4_HUMAN	Q6UVK1	CSPG4	Chondroitin sulfate proteoglycan 4 precursor - Homo sapiens (Human)	3	7	3	73	79	60	4.33333	70.6667	16.3077	0
CUL2_HUMAN	CUL2_HUMAN	Q13617	CUL2	Cullin-2 - Homo sapiens (Human)	0.9	0.9	0.9	5	8	7	0.9	6.66667	7.40741	0.00067847
CUL3_HUMAN	CUL3_HUMAN	Q13618	CUL3	Cullin-3 - Homo sapiens (Human)	0.9	0.9	0.9	7	6	9	0.9	7.33333	8.14815	0.000443343
DDX21_HUMAN	DDX21_HUMAN	Q9NR30	DDX21	Nucleolar RNA helicase 2 - Homo sapiens (Human)	0.9	0.9	0.9	5	10	5	0.9	6.66667	7.40741	0.00067847
DHX15_HUMAN	DHX15_HUMAN	O43143	DHX15	Putative pre-mRNA-splicing factor ATP-dependent RNA helicase DHX15 - Homo sapiens (Human)	8	4	8	23	19	18	6.66667	20	3	0.000305949
DJC10_HUMAN	DJC10_HUMAN	Q8IXB1	DNAJC10	DnaJ homolog subfamily C member 10 precursor - Homo sapiens (Human)	0.9	0.9	0.9	7	9	6	0.9	7.33333	8.14815	0.000443343
DNJC3_HUMAN	DNJC3_HUMAN	Q13217	DNAJC3	DnaJ homolog subfamily C member 3 - Homo sapiens (Human)	0.9	2	3	12	8	5	1.96667	8.33333	4.23729	0.000954674
DNJCD_HUMAN	DJC13_HUMAN	O75165	DNAJC13	DnaJ homolog subfamily C member 13 - Homo sapiens (Human)	14	17	17	8	8	0.9	16	5.63333	0.352083	0.000528329
DNM1L_HUMAN	DNM1L_HUMAN	O00429	DNM1L	Dynamin-1-like protein - Homo sapiens (Human)	2	6	3	19	16	6	3.66667	13.6667	3.72727	0.000390935
DPP4_HUMAN	DPP4_HUMAN	P27487	DPP4	Dipeptidyl peptidase 4 - Homo sapiens (Human)	31	25	19	0.9	0.9	0.9	25	0.9	0.036	1.41643e-06
DSRAD_HUMAN	DSRAD_HUMAN	P55265	ADAR	Double-stranded RNA-specific adenosine deaminase - Homo sapiens (Human)	1	0.9	1	5	7	10	0.966667	7.33333	7.58621	0.000443343
DYHC_HUMAN	DYHC1_HUMAN	Q14204	DYNC1H1	Dynein heavy chain, cytosolic - Homo sapiens (Human)	167	186	149	90	116	72	167.333	92.6667	0.553785	1.13314e-05
ECHA_HUMAN	ECHA_HUMAN	P40939	HADHA	Trifunctional enzyme subunit alpha, mitochondrial precursor - Homo sapiens (Human)	25	28	29	26	15	0.9	27.3333	13.9667	0.510976	0.000835694
EF2_HUMAN	EF2_HUMAN	P13639	EEF2	Elongation factor 2 - Homo sapiens (Human)	16	16	23	42	45	37	18.3333	41.3333	2.25455	0.000177054
ELAV1_HUMAN	ELAV1_HUMAN	Q15717	ELAVL1	ELAV-like protein 1 - Homo sapiens (Human)	3	2	5	21	11	10	3.33333	14	4.2	0.000270538
ENOA_HUMAN	ENOA_HUMAN	P06733	ENO1	Alpha-enolase - Homo sapiens (Human)	23	17	22	53	58	38	20.6667	49.6667	2.40323	6.51558e-05
ENPL_HUMAN	ENPL_HUMAN	P14625	HSP90B1	Endoplasmin precursor - Homo sapiens (Human)	27	33	28	60	72	79	29.3333	70.3333	2.39773	3.96601e-05
ERO1A_HUMAN	ERO1A_HUMAN	Q96HE7	ERO1L	ERO1-like protein alpha precursor - Homo sapiens (Human)	3	4	3	15	13	12	3.33333	13.3333	4	0.000365439
FINC_HUMAN	FINC_HUMAN	P02751	FN1	Fibronectin precursor - Homo sapiens (Human)	1	1	2	34	34	24	1.33333	30.6667	23	1.41643e-06
FKBP4_HUMAN	FKBP4_HUMAN	Q02790	FKBP4	FK506-binding protein 4 - Homo sapiens (Human)	8	4	7	19	21	21	6.33333	20.3333	3.21053	0.000247875
FLNB_HUMAN	FLNB_HUMAN	O75369	FLNB	Filamin-B - Homo sapiens (Human)	0.9	1	2	25	33	21	1.3	26.3333	20.2564	5.66572e-06
FSCN1_HUMAN	FSCN1_HUMAN	Q16658	FSCN1	Fascin - Homo sapiens (Human)	2	0.9	1	20	22	25	1.3	22.3333	17.1795	1.41643e-05
G3P_HUMAN	G3P_HUMAN	P04406	GAPDH	Glyceraldehyde-3-phosphate dehydrogenase - Homo sapiens (Human)	34	44	33	121	107	93	37	107	2.89189	5.66572e-06
G6PD_HUMAN	G6PD_HUMAN	P11413	G6PD	Glucose-6-phosphate 1-dehydrogenase - Homo sapiens (Human)	7	8	7	29	17	16	7.33333	20.6667	2.81818	0.000362606
G6PI_HUMAN	G6PI_HUMAN	P06744	GPI	Glucose-6-phosphate isomerase - Homo sapiens (Human)	16	11	17	41	60	39	14.6667	46.6667	3.18182	3.68272e-05
GALT2_HUMAN	GALT2_HUMAN	Q10471	GALNT2	Polypeptide N-acetylgalactosaminyltransferase 2 - Homo sapiens (Human)	0.9	0.9	0.9	4	7	11	0.9	7.33333	8.14815	0.000443343
GBF1_HUMAN	GBF1_HUMAN	Q92538	GBF1	Golgi-specific brefeldin A-resistance guanine nucleotide exchange factor 1 - Homo sapiens (Human)	0.9	0.9	0.9	12	11	0.9	0.9	7.96667	8.85185	0.000327195
GCS1_HUMAN	MOGS_HUMAN	Q13724	MOGS	Mannosyl-oligosaccharide glucosidase - Homo sapiens (Human)	1	1	3	12	13	10	1.66667	11.6667	7	0.000177054
GDN_HUMAN	GDN_HUMAN	P07093	SERPINE2	Glia-derived nexin precursor - Homo sapiens (Human)	0.9	0.9	0.9	8	9	4	0.9	7	7.77778	0.00048017
GFPT1_HUMAN	GFPT1_HUMAN	Q06210	GFPT1	Glucosamine--fructose-6-phosphate aminotransferase [isomerizing] 1 - Homo sapiens (Human)	0.9	0.9	0.9	12	10	0.9	0.9	7.63333	8.48148	0.000398017
GGH_HUMAN	GGH_HUMAN	Q92820	GGH	Gamma-glutamyl hydrolase precursor - Homo sapiens (Human)	10	9	6	19	25	18	8.33333	20.6667	2.48	0.00048017
GLSK_HUMAN	GLSK_HUMAN	O94925	GLS	Glutaminase kidney isoform, mitochondrial precursor - Homo sapiens (Human)	0.9	0.9	0.9	13	8	12	0.9	11	12.2222	9.91501e-05
GOT1B_HUMAN	GOT1B_HUMAN	Q9Y3E0	GOLT1B	Vesicle transport protein GOT1B - Homo sapiens (Human)	1	2	1	11	10	7	1.33333	9.33333	7	0.000270538
GPNMB_HUMAN	GPNMB_HUMAN	Q14956	GPNMB	Transmembrane glycoprotein NMB precursor - Homo sapiens (Human)	22	18	23	0.9	0.9	0.9	21	0.9	0.0428571	7.08215e-06
H15_HUMAN	H15_HUMAN	P16401	HIST1H1B	Histone H1.5 - Homo sapiens (Human)	10	9	4	0.9	0.9	0.9	7.66667	0.9	0.117391	0.000390935
H2A1B_HUMAN	H2A1B_HUMAN	P04908	HIST1H2AB	Histone H2A type 1-B - Homo sapiens (Human)	0.9	0.9	0.9	21	13	8	0.9	14	15.5556	4.95751e-05
HCD2_HUMAN	HCD2_HUMAN	Q99714	HSD17B10	3-hydroxyacyl-CoA dehydrogenase type-2 - Homo sapiens (Human)	4	0.9	2	10	9	11	2.3	10	4.34783	0.00057932
HMCS1_HUMAN	HMCS1_HUMAN	Q01581	HMGCS1	Hydroxymethylglutaryl-CoA synthase, cytoplasmic - Homo sapiens (Human)	0.9	0.9	0.9	12	7	4	0.9	7.66667	8.51852	0.000398017
HNRPK_HUMAN	HNRPK_HUMAN	P61978	HNRNPK	Heterogeneous nuclear ribonucleoprotein K - Homo sapiens (Human)	51	32	45	30	21	23	42.6667	24.6667	0.578125	0.000669972
HSP72_HUMAN	HSP72_HUMAN	P54652	HSPA2	Heat shock-related 70 kDa protein 2 - Homo sapiens (Human)	25	16	17	8	6	0.9	19.3333	4.96667	0.256897	0.000155807
HYEP_HUMAN	HYEP_HUMAN	P07099	EPHX1	Epoxide hydrolase 1 - Homo sapiens (Human)	15	10	7	0.9	0.9	3	10.6667	1.6	0.15	0.000226629
ICAM1_HUMAN	ICAM1_HUMAN	P05362	ICAM1	Intercellular adhesion molecule 1 precursor - Homo sapiens (Human)	0.9	0.9	0.9	19	16	8	0.9	14.3333	15.9259	4.67422e-05
IF4G2_HUMAN	IF4G2_HUMAN	P78344	EIF4G2	Eukaryotic translation initiation factor 4 gamma 2 - Homo sapiens (Human)	1	0.9	2	9	6	8	1.3	7.66667	5.89744	0.000601983
IF5A1_HUMAN	IF5A1_HUMAN	P63241	EIF5A	Eukaryotic translation initiation factor 5A-1 - Homo sapiens (Human)	1	5	1	15	12	11	2.33333	12.6667	5.42857	0.00021813
IMA2_HUMAN	IMA2_HUMAN	P52292	KPNA2	Importin subunit alpha-2 - Homo sapiens (Human)	2	1	2	11	12	12	1.66667	11.6667	7	0.000177054
IPO7_HUMAN	IPO7_HUMAN	O95373	IPO7	Importin-7 - Homo sapiens (Human)	3	3	2	12	11	11	2.66667	11.3333	4.25	0.000419263
IQGA3_HUMAN	IQGA3_HUMAN	Q86VI3	IQGAP3	Ras GTPase-activating-like protein IQGAP3 - Homo sapiens (Human)	0.9	0.9	0.9	11	11	0.9	0.9	7.63333	8.48148	0.000398017
ITA2_HUMAN	ITA2_HUMAN	P17301	ITGA2	Integrin alpha-2 precursor - Homo sapiens (Human)	0.9	0.9	0.9	12	18	0.9	0.9	10.3	11.4444	0.000141643
ITA3_HUMAN	ITA3_HUMAN	P26006	ITGA3	Integrin alpha-3 precursor - Homo sapiens (Human)	3	2	1	12	13	3	2	9.33333	4.66667	0.000562323
ITAV_HUMAN	ITAV_HUMAN	P06756	ITGAV	Integrin alpha-V precursor - Homo sapiens (Human)	6	5	7	22	18	9	6	16.3333	2.72222	0.000709632
ITPR3_HUMAN	ITPR3_HUMAN	Q14573	ITPR3	Inositol 1,4,5-trisphosphate receptor type 3 - Homo sapiens (Human)	3	1	0.9	9	8	9	1.63333	8.66667	5.30612	0.00048017
K1C10_HUMAN	K1C10_HUMAN	P13645	KRT10	Keratin, type I cytoskeletal 10 - Homo sapiens (Human)	82	82	79	0.9	0.9	0.9	81	0.9	0.0111111	0
K1C9_HUMAN	K1C9_HUMAN	P35527	KRT9	Keratin, type I cytoskeletal 9 - Homo sapiens (Human)	41	49	59	0.9	0.9	0.9	49.6667	0.9	0.0181208	0
K22E_HUMAN	K22E_HUMAN	P35908	KRT2	Keratin, type II cytoskeletal 2 epidermal - Homo sapiens (Human)	53	51	61	0.9	0.9	0.9	55	0.9	0.0163636	0
K2C1_HUMAN	K2C1_HUMAN	P04264	KRT1	Keratin, type II cytoskeletal 1 - Homo sapiens (Human)	96	83	82	0.9	0.9	0.9	87	0.9	0.0103448	0
K2C5_HUMAN	K2C5_HUMAN	P13647	KRT5	Keratin, type II cytoskeletal 5 - Homo sapiens (Human)	7	6	11	0.9	0.9	0.9	8	0.9	0.1125	0.000311615
K6PF_HUMAN	K6PF_HUMAN	P08237	PFKM	6-phosphofructokinase, muscle type - Homo sapiens (Human)	6	6	6	1	1	1	6	1	0.166667	0.000939093
KDEL2_HUMAN	KDEL2_HUMAN	Q7Z4H8	KDELC2	KDEL motif-containing protein 2 precursor - Homo sapiens (Human)	0.9	0.9	0.9	5	7	7	0.9	6.33333	7.03704	0.00083711
KRT81_HUMAN	KRT81_HUMAN	Q14533	KRT81	Keratin type II cuticular Hb1 - Homo sapiens (Human)	16	17	15	0.9	0.9	0.9	16	0.9	0.05625	2.9745e-05
KTN1_HUMAN	KTN1_HUMAN	Q86UP2	KTN1	Kinectin - Homo sapiens (Human)	14	15	20	9	6	0.9	16.3333	5.3	0.32449	0.000399433
LAT1_HUMAN	LAT1_HUMAN	Q01650	SLC7A5	Large neutral amino acids transporter small subunit 1 - Homo sapiens (Human)	7	8	6	1	1	0.9	7	0.966667	0.138095	0.000478754
LEG1_HUMAN	LEG1_HUMAN	P09382	LGALS1	Galectin-1 - Homo sapiens (Human)	9	11	16	28	23	23	12	24.6667	2.05556	0.000890935
LEG3_HUMAN	LEG3_HUMAN	P17931	LGALS3	Galectin-3 - Homo sapiens (Human)	20	16	23	2	4	3	19.6667	3	0.152542	6.09065e-05
LIPB1_HUMAN	LIPB1_HUMAN	Q86W92	PPFIBP1	Liprin-beta-1 - Homo sapiens (Human)	0.9	0.9	0.9	8	10	8	0.9	8.66667	9.62963	0.000249292
LMAN1_HUMAN	LMAN1_HUMAN	P49257	LMAN1	Protein ERGIC-53 precursor - Homo sapiens (Human)	0.9	0.9	0.9	6	7	10	0.9	7.66667	8.51852	0.000398017
MACF1_HUMAN	MACF1_HUMAN	Q9UPN3	MACF1	Microtubule-actin cross-linking factor 1, isoforms 1/2/3/5 - Homo sapiens (Human)	3	1	1	11	13	3	1.66667	9	5.4	0.000446176
MAP1B_HUMAN	MAP1B_HUMAN	P46821	MAP1B	Microtubule-associated protein 1B - Homo sapiens (Human)	2	0.9	0.9	42	30	28	1.26667	33.3333	26.3158	1.41643e-06
MARCS_HUMAN	MARCS_HUMAN	P29966	MARCKS	Myristoylated alanine-rich C-kinase substrate - Homo sapiens (Human)	17	12	10	3	0.9	0.9	13	1.6	0.123077	0.000101983
MICA1_HUMAN	MICA1_HUMAN	Q8TDZ2	MICAL1	NEDD9-interacting protein with calponin homology and LIM domains - Homo sapiens (Human)	6	6	6	0.9	0.9	0.9	6	0.9	0.15	0.000939093
MPRI_HUMAN	MPRI_HUMAN	P11717	IGF2R	Cation-independent mannose-6-phosphate receptor precursor - Homo sapiens (Human)	2	1	1	8	8	11	1.33333	9	6.75	0.000322946
MY18A_HUMAN	MY18A_HUMAN	Q92614	MYO18A	Myosin-XVIIIa - Homo sapiens (Human)	4	11	7	0.9	0.9	0.9	7.33333	0.9	0.122727	0.000419263
MYH10_HUMAN	MYH10_HUMAN	P35580	MYH10	Myosin-10 - Homo sapiens (Human)	66	74	62	30	21	13	67.3333	21.3333	0.316832	7.08215e-06
MYH9_HUMAN	MYH9_HUMAN	P35579	MYH9	Myosin-9 - Homo sapiens (Human)	71	84	75	129	122	72	76.6667	107.667	1.40435	0.000664306
MYO1D_HUMAN	MYO1D_HUMAN	O94832	MYO1D	Myosin-Id - Homo sapiens (Human)	18	19	17	0.9	0.9	0.9	18	0.9	0.05	1.13314e-05
MYO5A_HUMAN	MYO5A_HUMAN	Q9Y4I1	MYO5A	Myosin-Va - Homo sapiens (Human)	28	25	26	1	1	0.9	26.3333	0.966667	0.0367089	1.41643e-06
NAMPT_HUMAN	NAMPT_HUMAN	P43490	NAMPT	Nicotinamide phosphoribosyltransferase - Homo sapiens (Human)	2	2	5	10	12	10	3	10.6667	3.55556	0.000796034
NDRG1_HUMAN	NDRG1_HUMAN	Q92597	NDRG1	Protein NDRG1 - Homo sapiens (Human)	0.9	0.9	0.9	8	12	4	0.9	8	8.88889	0.000327195
NDUS1_HUMAN	NDUS1_HUMAN	P28331	NDUFS1	NADH-ubiquinone oxidoreductase 75 kDa subunit, mitochondrial precursor - Homo sapiens (Human)	9	7	9	3	0.9	0.9	8.33333	1.6	0.192	0.000596317
NEST_HUMAN	NEST_HUMAN	P48681	NES	Nestin - Homo sapiens (Human)	9	6	1	62	79	45	5.33333	62	11.625	0
NSUN2_HUMAN	NSUN2_HUMAN	Q08J23	NSUN2	tRNA - Homo sapiens (Human)	2	1	0.9	10	4	8	1.3	7.33333	5.64103	0.00074221
P5CS_HUMAN	P5CS_HUMAN	P54886	ALDH18A1	Delta-1-pyrroline-5-carboxylate synthetase - Homo sapiens (Human)	4	4	3	17	10	14	3.66667	13.6667	3.72727	0.000390935
PA2G4_HUMAN	PA2G4_HUMAN	Q9UQ80	PA2G4	Proliferation-associated protein 2G4 - Homo sapiens (Human)	15	6	16	6	3	1	12.3333	3.33333	0.27027	0.000434844
PARK7_HUMAN	PARK7_HUMAN	Q99497	PARK7	Protein DJ-1 - Homo sapiens (Human)	7	7	5	23	14	12	6.33333	16.3333	2.57895	0.000862606
PDIA1_HUMAN	PDIA1_HUMAN	P07237	P4HB	Protein disulfide-isomerase precursor - Homo sapiens (Human)	15	13	12	46	33	39	13.3333	39.3333	2.95	5.94901e-05
PDIA3_HUMAN	PDIA3_HUMAN	P30101	PDIA3	Protein disulfide-isomerase A3 precursor - Homo sapiens (Human)	26	21	19	57	72	42	22	57	2.59091	3.96601e-05
PDIA4_HUMAN	PDIA4_HUMAN	P13667	PDIA4	Protein disulfide-isomerase A4 precursor - Homo sapiens (Human)	4	4	5	35	33	6	4.33333	24.6667	5.69231	3.96601e-05
PICAL_HUMAN	PICAL_HUMAN	Q13492	PICALM	Phosphatidylinositol-binding clathrin assembly protein - Homo sapiens (Human)	0.9	1	2	9	6	6	1.3	7	5.38462	0.000885269
PIR_HUMAN	PIR_HUMAN	O00625	PIR	Pirin - Homo sapiens (Human)	8	16	10	0.9	0.9	0.9	11.3333	0.9	0.0794118	8.78187e-05
PLEC1_HUMAN	PLEC1_HUMAN	Q15149	PLEC1	Plectin-1 - Homo sapiens (Human)	102	136	93	223	257	174	110.333	218	1.97583	5.66572e-06
PLOD1_HUMAN	PLOD1_HUMAN	Q02809	PLOD1	Procollagen-lysine,2-oxoglutarate 5-dioxygenase 1 precursor - Homo sapiens (Human)	2	2	2	17	22	21	2	20	10	3.25779e-05
PLOD3_HUMAN	PLOD3_HUMAN	O60568	PLOD3	Procollagen-lysine,2-oxoglutarate 5-dioxygenase 3 precursor - Homo sapiens (Human)	1	1	2	30	28	19	1.33333	25.6667	19.25	5.66572e-06
PLST_HUMAN	PLST_HUMAN	P13797	PLS3	Plastin-3 - Homo sapiens (Human)	11	9	5	3	1	0.9	8.33333	1.63333	0.196	0.000596317
PME17_HUMAN	PME17_HUMAN	P40967	SILV	Melanocyte protein Pmel 17 precursor - Homo sapiens (Human)	43	55	49	0.9	0.9	0.9	49	0.9	0.0183673	0
PRKDC_HUMAN	PRKDC_HUMAN	P78527	PRKDC	DNA-dependent protein kinase catalytic subunit - Homo sapiens (Human)	59	56	48	116	129	73	54.3333	106	1.95092	3.96601e-05
PSMD1_HUMAN	PSMD1_HUMAN	Q99460	PSMD1	26S proteasome non-ATPase regulatory subunit 1 - Homo sapiens (Human)	4	4	2	14	9	10	3.33333	11	3.3	0.000896601
PTBP1_HUMAN	PTBP1_HUMAN	P26599	PTBP1	Polypyrimidine tract-binding protein 1 - Homo sapiens (Human)	15	8	10	32	28	25	11	28.3333	2.57576	0.000246459
PYGB_HUMAN	PYGB_HUMAN	P11216	PYGB	Glycogen phosphorylase, brain form - Homo sapiens (Human)	21	17	13	60	74	68	17	67.3333	3.96078	5.66572e-06
PYR1_HUMAN	PYR1_HUMAN	P27708	CAD	CAD protein [Includes: Glutamine-dependent carbamoyl-phosphate synthase - Homo sapiens (Human)	2	2	4	12	10	13	2.66667	11.6667	4.375	0.000390935
Q3B7K3_HUMAN	Q3B7K3_HUMAN	Q3B7K3	IKIP	IKIP protein - Homo sapiens (Human)	1	0.9	2	8	6	8	1.3	7.33333	5.64103	0.00074221
Q5T663_HUMAN	Q5T663_HUMAN	Q5T663	ITIH5	Inter-alpha - Homo sapiens (Human)	0.9	0.9	0.9	6	12	8	0.9	8.66667	9.62963	0.000249292
Q9UCN2_HUMAN	ALDOA_HUMAN	Q9UCN2	ALDOA	Fructose-1,6-bisphosphate aldolase A - Homo sapiens (Human)	0.9	0.9	0.9	2	3	16	0.9	7	7.77778	0.00048017
RAB32_HUMAN	RAB32_HUMAN	Q13637	RAB32	Ras-related protein Rab-32 - Homo sapiens (Human)	15	10	7	3	3	2	10.6667	2.66667	0.25	0.00051983
RALY_HUMAN	RALY_HUMAN	Q9UKM9	RALY	RNA-binding protein Raly - Homo sapiens (Human)	24	8	9	5	2	2	13.6667	3	0.219512	0.000229462
RAPH1_HUMAN	RAPH1_HUMAN	Q70E73	RAPH1	Ras-associated and pleckstrin homology domains-containing protein 1 - Homo sapiens (Human)	0.9	0.9	0.9	12	10	0.9	0.9	7.63333	8.48148	0.000398017
RB27A_HUMAN	RB27A_HUMAN	P51159	RAB27A	Ras-related protein Rab-27A - Homo sapiens (Human)	8	2	9	0.9	0.9	0.9	6.33333	0.9	0.142105	0.000760623
RECQ1_HUMAN	RECQ1_HUMAN	P46063	RECQL	ATP-dependent DNA helicase Q1 - Homo sapiens (Human)	3	3	3	18	14	3	3	11.6667	3.88889	0.000458924
RETST_HUMAN	RETST_HUMAN	Q6NUM9	RETSAT	All-trans-retinol 13,14-reductase precursor - Homo sapiens (Human)	8	5	9	0.9	0.9	0.9	7.33333	0.9	0.122727	0.000419263
RIB2_HUMAN	RPN2_HUMAN	P04844	RPN2	Dolichyl-diphosphooligosaccharide--protein glycosyltransferase 63 kDa subunit precursor - Homo sapiens (Human)	7	7	9	25	31	29	7.66667	28.3333	3.69565	6.51558e-05
RIC8A_HUMAN	RIC8A_HUMAN	Q9NPQ8	RIC8A	Synembryn-A - Homo sapiens (Human)	0.9	0.9	0.9	5	9	5	0.9	6.33333	7.03704	0.00083711
RRP44_HUMAN	RRP44_HUMAN	Q9Y2L1	DIS3	Exosome complex exonuclease RRP44 - Homo sapiens (Human)	0.9	1	2	8	7	8	1.3	7.66667	5.89744	0.000601983
RS17_HUMAN	RS17_HUMAN	P08708	RPS17	40S ribosomal protein S17 - Homo sapiens (Human)	2	4	1	9	12	8	2.33333	9.66667	4.14286	0.00072238
RS2_HUMAN	RS2_HUMAN	P15880	RPS2	40S ribosomal protein S2 - Homo sapiens (Human)	5	2	5	19	9	13	4	13.6667	3.41667	0.000457507
RS4X_HUMAN	RS4X_HUMAN	P62701	RPS4X	40S ribosomal protein S4, X isoform - Homo sapiens (Human)	3	3	4	15	6	13	3.33333	11.3333	3.4	0.000784703
RTN4_HUMAN	RTN4_HUMAN	Q9NQC3	RTN4	Reticulon-4 - Homo sapiens (Human)	6	6	6	19	17	17	6	17.6667	2.94444	0.000415014
S100B_HUMAN	S100B_HUMAN	P04271	S100B	Protein S100-B - Homo sapiens (Human)	0.9	0.9	0.9	7	11	9	0.9	9	10	0.000225212
SATT_HUMAN	SATT_HUMAN	P43007	SLC1A4	Neutral amino acid transporter A - Homo sapiens (Human)	13	11	13	1	2	2	12.3333	1.66667	0.135135	0.000127479
SC22B_HUMAN	SC22B_HUMAN	O75396	SEC22B	Vesicle-trafficking protein SEC22b - Homo sapiens (Human)	16	14	27	5	6	6	19	5.66667	0.298246	0.000229462
SC24A_HUMAN	SC24A_HUMAN	O95486	SEC24A	Protein transport protein Sec24A - Homo sapiens (Human)	0.9	0.9	0.9	7	9	13	0.9	9.66667	10.7407	0.000177054
SC31A_HUMAN	SC31A_HUMAN	O94979	SEC31A	Protein transport protein Sec31A - Homo sapiens (Human)	3	2	5	14	13	6	3.33333	11	3.3	0.000896601
SCPDH_HUMAN	SCPDH_HUMAN	Q8NBX0	SCCPDH	Probable saccharopine dehydrogenase - Homo sapiens (Human)	2	0.9	1	8	12	4	1.3	8	6.15385	0.000464589
SERPH_HUMAN	SERPH_HUMAN	P50454	SERPINH1	Serpin H1 precursor - Homo sapiens (Human)	6	11	14	34	33	33	10.3333	33.3333	3.22581	6.51558e-05
SNAA_HUMAN	SNAA_HUMAN	P54920	NAPA	Alpha-soluble NSF attachment protein - Homo sapiens (Human)	21	11	13	4	4	3	15	3.66667	0.244444	0.000229462
SORT_HUMAN	SORT_HUMAN	Q99523	SORT1	Sortilin precursor - Homo sapiens (Human)	5	8	6	0.9	0.9	0.9	6.33333	0.9	0.142105	0.000760623
SPTA2_HUMAN	SPTA2_HUMAN	Q13813	SPTAN1	Spectrin alpha chain, brain - Homo sapiens (Human)	113	117	97	78	87	72	109	79	0.724771	0.00073796
SPTB2_HUMAN	SPTB2_HUMAN	Q01082	SPTBN1	Spectrin beta chain, brain 1 - Homo sapiens (Human)	79	98	64	48	60	44	80.3333	50.6667	0.630705	0.00033711
STAT1_HUMAN	STAT1_HUMAN	P42224	STAT1	Signal transducer and activator of transcription 1-alpha/beta - Homo sapiens (Human)	2	0.9	0.9	12	9	9	1.26667	10	7.89474	0.000225212
STOM_HUMAN	STOM_HUMAN	P27105	STOM	Erythrocyte band 7 integral membrane protein - Homo sapiens (Human)	19	13	14	0.9	0.9	0.9	15.3333	0.9	0.0586957	3.54108e-05
STX7_HUMAN	STX7_HUMAN	O15400	STX7	Syntaxin-7 - Homo sapiens (Human)	6	9	11	1	1	1	8.66667	1	0.115385	0.000239377
STXB1_HUMAN	STXB1_HUMAN	P61764	STXBP1	Syntaxin-binding protein 1 - Homo sapiens (Human)	4	10	11	4	1	1	8.33333	2	0.24	0.000847025
SYCC_HUMAN	SYCC_HUMAN	P49589	CARS	Cysteinyl-tRNA synthetase, cytoplasmic - Homo sapiens (Human)	1	3	0.9	16	17	11	1.63333	14.6667	8.97959	6.51558e-05
SYTC_HUMAN	SYTC_HUMAN	P26639	TARS	Threonyl-tRNA synthetase, cytoplasmic - Homo sapiens (Human)	7	6	4	19	21	18	5.66667	19.3333	3.41176	0.000225212
TBB2C_HUMAN	TBB2C_HUMAN	P68371	TUBB2C	Tubulin beta-2C chain - Homo sapiens (Human)	35	33	37	22	17	10	35	16.3333	0.466667	0.000294618
TCPB_HUMAN	TCPB_HUMAN	P78371	CCT2	T-complex protein 1 subunit beta - Homo sapiens (Human)	13	12	12	40	36	42	12.3333	39.3333	3.18919	4.95751e-05
TCPD_HUMAN	TCPD_HUMAN	P50991	CCT4	T-complex protein 1 subunit delta - Homo sapiens (Human)	8	10	13	30	23	18	10.3333	23.6667	2.29032	0.00057932
TCPQ_HUMAN	TCPQ_HUMAN	P50990	CCT8	T-complex protein 1 subunit theta - Homo sapiens (Human)	11	12	9	50	29	27	10.6667	35.3333	3.3125	5.94901e-05
TERA_HUMAN	TERA_HUMAN	P55072	VCP	Transitional endoplasmic reticulum ATPase - Homo sapiens (Human)	17	15	17	47	50	39	16.3333	45.3333	2.77551	5.94901e-05
TFR1_HUMAN	TFR1_HUMAN	P02786	TFRC	Transferrin receptor protein 1 - Homo sapiens (Human)	0.9	0.9	0.9	21	22	21	0.9	21.3333	23.7037	1.41643e-05
TGM2_HUMAN	TGM2_HUMAN	P21980	TGM2	Protein-glutamine gamma-glutamyltransferase 2 - Homo sapiens (Human)	0.9	0.9	0.9	11	7	3	0.9	7	7.77778	0.00048017
TKT_HUMAN	TKT_HUMAN	P29401	TKT	Transketolase - Homo sapiens (Human)	28	35	31	24	20	3	31.3333	15.6667	0.5	0.000525496
TMEDA_HUMAN	TMEDA_HUMAN	P49755	TMED10	Transmembrane emp24 domain-containing protein 10 precursor - Homo sapiens (Human)	3	3	2	10	8	12	2.66667	10	3.75	0.000831445
TOIP1_HUMAN	TOIP1_HUMAN	Q5JTV8	TOR1AIP1	Torsin-1A-interacting protein 1 - Homo sapiens (Human)	1	2	4	10	11	12	2.33333	11	4.71429	0.000378187
TPIS_HUMAN	TPIS_HUMAN	P60174	TPI1	Triosephosphate isomerase - Homo sapiens (Human)	17	1	33	34	73	22	17	43	2.52941	9.34844e-05
TPM4_HUMAN	TPM4_HUMAN	P67936	TPM4	Tropomyosin alpha-4 chain - Homo sapiens (Human)	16	4	16	2	1	2	12	1.66667	0.138889	0.000152975
TRXR1_HUMAN	TRXR1_HUMAN	Q16881	TXNRD1	Thioredoxin reductase 1, cytoplasmic precursor - Homo sapiens (Human)	3	3	5	24	19	11	3.66667	18	4.90909	9.91501e-05
TYRP1_HUMAN	TYRP1_HUMAN	P17643	TYRP1	5,6-dihydroxyindole-2-carboxylic acid oxidase precursor - Homo sapiens (Human)	24	25	39	0.9	0.9	0.9	29.3333	0.9	0.0306818	0
U2AF2_HUMAN	U2AF2_HUMAN	P26368	U2AF2	Splicing factor U2AF 65 kDa subunit - Homo sapiens (Human)	2	1	0.9	7	7	8	1.3	7.33333	5.64103	0.00074221
UBP14_HUMAN	UBP14_HUMAN	P54578	USP14	Ubiquitin carboxyl-terminal hydrolase 14 - Homo sapiens (Human)	3	3	2	16	6	7	2.66667	9.66667	3.625	0.00094051
UGGG1_HUMAN	UGGG1_HUMAN	Q9NYU2	UGCGL1	UDP-glucose:glycoprotein glucosyltransferase 1 precursor - Homo sapiens (Human)	7	8	12	43	42	1	9	28.6667	3.18519	9.91501e-05
UGPA_HUMAN	UGPA_HUMAN	Q16851	UGP2	UTP--glucose-1-phosphate uridylyltransferase - Homo sapiens (Human)	3	5	3	26	27	21	3.66667	24.6667	6.72727	3.25779e-05
USO1_HUMAN	USO1_HUMAN	O60763	USO1	General vesicular transport factor p115 - Homo sapiens (Human)	4	5	2	12	10	15	3.66667	12.3333	3.36364	0.000664306
VAT1_HUMAN	VAT1_HUMAN	Q99536	VAT1	Synaptic vesicle membrane protein VAT-1 homolog - Homo sapiens (Human)	28	31	32	6	5	3	30.3333	4.66667	0.153846	1.13314e-05
VATA_HUMAN	VATA_HUMAN	P38606	ATP6V1A	Vacuolar ATP synthase catalytic subunit A - Homo sapiens (Human)	18	16	33	7	8	0.9	22.3333	5.3	0.237313	8.64023e-05
VATB1_HUMAN	VATB1_HUMAN	P15313	ATP6V1B1	Vacuolar ATP synthase subunit B, kidney isoform - Homo sapiens (Human)	2	12	12	1	1	1	8.66667	1	0.115385	0.000239377
VATB2_HUMAN	VATB2_HUMAN	P21281	ATP6V1B2	Vacuolar ATP synthase subunit B, brain isoform - Homo sapiens (Human)	9	33	14	4	7	4	18.6667	5	0.267857	0.000169972
VATE1_HUMAN	VATE1_HUMAN	P36543	ATP6V1E1	Vacuolar ATP synthase subunit E 1 - Homo sapiens (Human)	11	9	14	2	3	4	11.3333	3	0.264706	0.00051983
VIME_HUMAN	VIME_HUMAN	P08670	VIM	Vimentin - Homo sapiens (Human)	99	122	113	275	226	222	111.333	241	2.16467	0
VP26A_HUMAN	VP26A_HUMAN	O75436	VPS26A	Vacuolar protein sorting-associated protein 26A - Homo sapiens (Human)	8	10	8	2	2	2	8.66667	2	0.230769	0.000730878
VPP1_HUMAN	VPP1_HUMAN	Q93050	ATP6V0A1	Vacuolar proton translocating ATPase 116 kDa subunit a isoform 1 - Homo sapiens (Human)	14	14	19	2	1	0.9	15.6667	1.3	0.0829787	4.10765e-05
XPO1_HUMAN	XPO1_HUMAN	O14980	XPO1	Exportin-1 - Homo sapiens (Human)	8	10	6	22	19	18	8	19.6667	2.45833	0.000664306

## Sheet: ctl_tm_DEP.001
2007_id	2009_id	accession	gene	desc	ctl-a	ctl-b	ctl-c	tm-a	tm-b	mean(ctl)	mean(tum)	ratio (tm/ctl)	p-value		FDR =	0.702849	%
1433B_HUMAN	1433B_HUMAN	P31946	YWHAB	14-3-3 protein beta/alpha - Homo sapiens (Human)	13	6	30	69	68	16.3333	68.5	4.19388	1e-05
1433E_HUMAN	1433E_HUMAN	P62258	YWHAE	14-3-3 protein epsilon - Homo sapiens (Human)	28	26	22	92	91	25.3333	91.5	3.61184	3.34e-06
1433G_HUMAN	1433G_HUMAN	P61981	YWHAG	14-3-3 protein gamma - Homo sapiens (Human)	6	1	7	28	31	4.66667	29.5	6.32143	3.34e-05
1433T_HUMAN	1433T_HUMAN	P27348	YWHAQ	14-3-3 protein theta - Homo sapiens (Human)	9	0.9	16	34	21	8.63333	27.5	3.18533	0.000200173
1433Z_HUMAN	1433Z_HUMAN	P63104	YWHAZ	14-3-3 protein zeta/delta - Homo sapiens (Human)	50	8	21	185	162	26.3333	173.5	6.58861	0
2AAA_HUMAN	2AAA_HUMAN	P30153	PPP2R1A	Serine/threonine-protein phosphatase 2A 65 kDa regulatory subunit A alpha isoform - Homo sapiens (Human)	5	8	9	1	1	7.33333	1	0.136364	0.00094415
A1AT_HUMAN	A1AT_HUMAN	P01009	SERPINA1	Alpha-1-antitrypsin	0.9	0.9	0.9	88	82	0.9	85	94.4444	0
A2MG_HUMAN	A2MG_HUMAN	P01023	A2M	Alpha-2-macroglobulin precursor - Homo sapiens (Human)	1	2	2	22	13	1.66667	17.5	10.5	7.67e-05
A8K7N0_HUMAN	A8K7N0_HUMAN	A8K7N0	N/A	cDNA FLJ75556, highly similar to Homo sapiens ribosomal protein L14, mRNA	0.9	0.9	0.9	11	13	0.9	12	13.3333	0.000146794
AACT_HUMAN	AACT_HUMAN	P01011	SERPINA3	Alpha-1-antichymotrypsin precursor - Homo sapiens (Human)	0.9	0.9	0.9	24	14	0.9	19	21.1111	3.34e-05
AATM_HUMAN	AATM_HUMAN	P00505	GOT2	Aspartate aminotransferase, mitochondrial precursor - Homo sapiens (Human)	2	8	9	21	29	6.33333	25	3.94737	0.000126776
ACADV_HUMAN	ACADV_HUMAN	P49748	ACADVL	Very long-chain specific acyl-CoA dehydrogenase, mitochondrial precursor - Homo sapiens (Human)	12	14	12	5	2	12.6667	3.5	0.276316	0.000950822
ACLY_HUMAN	ACLY_HUMAN	P53396	ACLY	ATP-citrate synthase - Homo sapiens (Human)	18	22	12	8	3	17.3333	5.5	0.317308	0.000737304
ACTB_HUMAN	ACTB_HUMAN	P60709	ACTB	Actin, cytoplasmic 1 - Homo sapiens (Human)	25	28	30	242	223	27.6667	232.5	8.40361	0
ACTN1_HUMAN	ACTN1_HUMAN	P12814	ACTN1	Alpha-actinin-1 - Homo sapiens (Human)	26	38	37	209	189	33.6667	199	5.91089	0
ACTN4_HUMAN	ACTN4_HUMAN	O43707	ACTN4	Alpha-actinin-4 - Homo sapiens (Human)	23	20	27	76	76	23.3333	76	3.25714	2e-05
ADT1_HUMAN	ADT1_HUMAN	P12235	SLC25A4	ADP/ATP translocase 1 - Homo sapiens (Human)	15	13	17	31	40	15	35.5	2.36667	0.00027357
ADT3_HUMAN	ADT3_HUMAN	P12236	SLC25A6	ADP/ATP translocase 3	0.9	0.9	0.9	10	11	0.9	10.5	11.6667	0.000206846
AHNK_HUMAN	AHNK_HUMAN	Q09666	AHNAK	Neuroblast differentiation-associated protein AHNAK - Homo sapiens (Human)	245	270	234	11	8	249.667	9.5	0.0380507	0
AL1B1_HUMAN	AL1B1_HUMAN	P30837	ALDH1B1	Aldehyde dehydrogenase X, mitochondrial precursor - Homo sapiens (Human)	0.9	0.9	0.9	35	27	0.9	31	34.4444	3.34e-06
ALBU_HUMAN	ALBU_HUMAN	P02768	ALB	Serum albumin precursor - Homo sapiens (Human)	5	6	2	756	713	4.33333	734.5	169.5	0
ALDOA_HUMAN	ALDOA_HUMAN	P04075	ALDOA	Fructose-bisphosphate aldolase A - Homo sapiens (Human)	16	18	13	137	115	15.6667	126	8.04255	0
AMPL_HUMAN	AMPL_HUMAN	P28838	LAP3	Cytosol aminopeptidase - Homo sapiens (Human)	8	6	6	23	21	6.66667	22	3.3	0.00027357
AN32A_HUMAN	AN32A_HUMAN	P39687	ANP32A	Acidic leucine-rich nuclear phosphoprotein 32 family member A - Homo sapiens (Human)	4	2	1	15	15	2.33333	15	6.42857	0.000180156
ANXA1_HUMAN	ANXA1_HUMAN	P04083	ANXA1	Annexin A1 - Homo sapiens (Human)	3	1	2	137	137	2	137	68.5	0
ANXA2_HUMAN	ANXA2_HUMAN	P07355	ANXA2	Annexin A2 - Homo sapiens (Human)	58	65	62	282	278	61.6667	280	4.54054	0
ANXA4_HUMAN	ANXA4_HUMAN	P09525	ANXA4	Annexin A4 - Homo sapiens (Human)	10	9	10	34	23	9.66667	28.5	2.94828	0.000213518
ANXA5_HUMAN	ANXA5_HUMAN	P08758	ANXA5	Annexin A5 - Homo sapiens (Human)	48	46	54	204	233	49.3333	218.5	4.42905	0
APEX1_HUMAN	APEX1_HUMAN	P27695	APEX1	DNA-(apurinic or apyrimidinic site) lyase - Homo sapiens (Human)	8	14	6	28	19	9.33333	23.5	2.51786	0.000667244
APOA1_HUMAN	APOA1_HUMAN	P02647	APOA1	Apolipoprotein A-I	0.9	0.9	0.9	32	30	0.9	31	34.4444	3.34e-06
ARF1_HUMAN	ARF1_HUMAN	P84077	ARF1	ADP-ribosylation factor 1 - Homo sapiens (Human)	12	12	11	34	42	11.6667	38	3.25714	7.67e-05
ARF4_HUMAN	ARF4_HUMAN	P18085	ARF4	ADP-ribosylation factor 4 - Homo sapiens (Human)	3	2	3	11	11	2.66667	11	4.125	0.000807365
ARPC2_HUMAN	ARPC2_HUMAN	O15144	ARPC2	Actin-related protein 2/3 complex subunit 2 - Homo sapiens (Human)	18	12	17	2	2	15.6667	2	0.12766	0.000163475
ARPC4_HUMAN	ARPC4_HUMAN	P59998	ARPC4	Actin-related protein 2/3 complex subunit 4 - Homo sapiens (Human)	5	2	5	13	18	4	15.5	3.875	0.000443717
AT1A1_HUMAN	AT1A1_HUMAN	P05023	ATP1A1	Sodium/potassium-transporting ATPase subunit alpha-1 precursor - Homo sapiens (Human)	29	39	35	13	14	34.3333	13.5	0.393204	0.000320277
AT2A1_HUMAN	AT2A1_HUMAN	O14983	ATP2A1	Sarcoplasmic/endoplasmic reticulum calcium ATPase 1 - Homo sapiens (Human)	8	14	12	2	3	11.3333	2.5	0.220588	0.000753986
ATPA_HUMAN	ATPA_HUMAN	P25705	ATP5A1	ATP synthase subunit alpha, mitochondrial precursor - Homo sapiens (Human)	28	30	31	212	181	29.6667	196.5	6.6236	0
ATPB_HUMAN	ATPB_HUMAN	P06576	ATP5B	ATP synthase subunit beta, mitochondrial precursor - Homo sapiens (Human)	43	41	45	286	280	43	283	6.5814	0
ATPG_HUMAN	ATPG_HUMAN	P36542	ATP5C1	ATP synthase gamma chain, mitochondrial precursor - Homo sapiens (Human)	5	9	6	24	13	6.66667	18.5	2.775	0.000760658
ATPK_HUMAN	ATPK_HUMAN	P56134	ATP5J2	ATP synthase f chain, mitochondrial - Homo sapiens (Human)	3	3	2	9	13	2.66667	11	4.125	0.000807365
ATPO_HUMAN	ATPO_HUMAN	P48047	ATP5O	ATP synthase subunit O, mitochondrial precursor - Homo sapiens (Human)	10	10	7	73	75	9	74	8.22222	0
B2R5W2_HUMAN	B2R5W2_HUMAN	B2R5W2	N/A	cDNA, FLJ92657, highly similar to Homo sapiens heterogeneous nuclear ribonucleoprotein C (C1/C2) (HNRPC), transcript variant 2, mRNA	0.9	0.9	0.9	17	18	0.9	17.5	19.4444	3.67e-05
B2RDE1_HUMAN	B2RDE1_HUMAN	B2RDE1	N/A	cDNA, FLJ96568, highly similar to Homo sapiens tropomyosin 3 (TPM3), mRNA	0.9	0.9	0.9	11	9	0.9	10	11.1111	0.000253553
B2RDY9_HUMAN	B2RDY9_HUMAN	B2RDY9	N/A	Adenylyl cyclase-associated protein	0.9	0.9	0.9	10	14	0.9	12	13.3333	0.000146794
BGH3_HUMAN	BGH3_HUMAN	Q15582	TGFBI	Transforming growth factor-beta-induced protein ig-h3 precursor - Homo sapiens (Human)	0.9	0.9	0.9	17	24	0.9	20.5	22.7778	3.34e-05
BIEA_HUMAN	BIEA_HUMAN	P53004	BLVRA	Biliverdin reductase A precursor - Homo sapiens (Human)	4	4	5	17	15	4.33333	16	3.69231	0.000443717
C1QBP_HUMAN	C1QBP_HUMAN	Q07021	C1QBP	Complement component 1 Q subcomponent-binding protein, mitochondrial precursor - Homo sapiens (Human)	2	0.9	2	13	13	1.63333	13	7.95918	0.000200173
CAPG_HUMAN	CAPG_HUMAN	P40121	CAPG	Macrophage-capping protein - Homo sapiens (Human)	21	16	8	1	2	15	1.5	0.1	0.00012344
CAPZB_HUMAN	CAPZB_HUMAN	P47756	CAPZB	F-actin-capping protein subunit beta - Homo sapiens (Human)	11	14	14	1	1	13	1	0.0769231	0.00012344
CATB_HUMAN	CATB_HUMAN	P07858	CTSB	Cathepsin B precursor - Homo sapiens (Human)	4	2	9	41	21	5	31	6.2	3.34e-05
CATD_HUMAN	CATD_HUMAN	P07339	CTSD	Cathepsin D precursor - Homo sapiens (Human)	70	37	68	119	126	58.3333	122.5	2.1	3.34e-05
CBR1_HUMAN	CBR1_HUMAN	P16152	CBR1	Carbonyl reductase [NADPH] 1 - Homo sapiens (Human)	2	7	8	32	35	5.66667	33.5	5.91176	3.34e-05
CD59_HUMAN	CD59_HUMAN	P13987	CD59	CD59 glycoprotein	0.9	0.9	0.9	10	7	0.9	8.5	9.44444	0.000463734
CD63_HUMAN	CD63_HUMAN	P08962	CD63	CD63 antigen - Homo sapiens (Human)	13	17	20	1	0.9	16.6667	0.95	0.057	7.67e-05
CH10_HUMAN	CH10_HUMAN	P61604	HSPE1	10 kDa heat shock protein, mitochondrial - Homo sapiens (Human)	5	7	8	29	26	6.66667	27.5	4.125	9.68e-05
CH60_HUMAN	CH60_HUMAN	P10809	HSPD1	60 kDa heat shock protein, mitochondrial precursor - Homo sapiens (Human)	35	32	33	233	183	33.3333	208	6.24	0
CLIC1_HUMAN	CLIC1_HUMAN	O00299	CLIC1	Chloride intracellular channel protein 1 - Homo sapiens (Human)	17	5	10	48	47	10.6667	47.5	4.45312	2e-05
CNDP2_HUMAN	CNDP2_HUMAN	Q96KP4	CNDP2	Cytosolic non-specific dipeptidase - Homo sapiens (Human)	11	5	11	1	1	9	1	0.111111	0.000527123
CO1A1_HUMAN	CO1A1_HUMAN	P02452	COL1A1	Collagen alpha-1(I) chain precursor - Homo sapiens (Human)	0.9	0.9	0.9	83	87	0.9	85	94.4444	0
CO1A2_HUMAN	CO1A2_HUMAN	P08123	COL1A2	Collagen alpha-2(I) chain	0.9	0.9	0.9	47	58	0.9	52.5	58.3333	0
CO3_HUMAN	CO3_HUMAN	P01024	C3	Complement C3	0.9	0.9	0.9	26	22	0.9	24	26.6667	2e-05
CO6A1_HUMAN	CO6A1_HUMAN	P12109	COL6A1	Collagen alpha-1(VI) chain precursor - Homo sapiens (Human)	0.9	0.9	0.9	106	101	0.9	103.5	115	0
CO6A2_HUMAN	CO6A2_HUMAN	P12110	COL6A2	Collagen alpha-2(VI) chain precursor - Homo sapiens (Human)	0.9	0.9	0.9	68	64	0.9	66	73.3333	0
CO6A3_HUMAN	CO6A3_HUMAN	P12111	COL6A3	Collagen alpha-3(VI) chain precursor - Homo sapiens (Human)	0.9	0.9	0.9	655	559	0.9	607	674.444	0
COCA1_HUMAN	COCA1_HUMAN	Q99715	COL12A1	Collagen alpha-1(XII) chain precursor - Homo sapiens (Human)	0.9	0.9	0.9	39	42	0.9	40.5	45	0
COEA1_HUMAN	COEA1_HUMAN	Q05707	COL14A1	Collagen alpha-1(XIV) chain	0.9	0.9	0.9	13	14	0.9	13.5	15	8.67e-05
COF1_HUMAN	COF1_HUMAN	P23528	CFL1	Cofilin-1 - Homo sapiens (Human)	6	10	13	34	36	9.66667	35	3.62069	7.67e-05
COPG2_HUMAN	COPG2_HUMAN	Q9UBF2	COPG2	Coatomer subunit gamma-2 - Homo sapiens (Human)	0.9	0.9	0.9	12	12	0.9	12	13.3333	0.000146794
CRYL1_HUMAN	CRYL1_HUMAN	Q9Y2S2	CRYL1	Lambda-crystallin homolog - Homo sapiens (Human)	4	9	9	0.9	1	7.33333	0.95	0.129545	0.00094415
CSN5_HUMAN	CSN5_HUMAN	Q92905	COPS5	COP9 signalosome complex subunit 5 - Homo sapiens (Human)	7	12	3	0.9	0.9	7.33333	0.9	0.122727	0.00094415
CTNA1_HUMAN	CTNA1_HUMAN	P35221	CTNNA1	Catenin alpha-1 - Homo sapiens (Human)	8	11	9	0.9	2	9.33333	1.45	0.155357	0.000677252
CYFP1_HUMAN	CYFP1_HUMAN	Q7L576	CYFIP1	Cytoplasmic FMR1-interacting protein 1 - Homo sapiens (Human)	7	10	7	1	0.9	8	0.95	0.11875	0.000737304
DCTN1_HUMAN	DCTN1_HUMAN	Q14203	DCTN1	Dynactin subunit 1 - Homo sapiens (Human)	17	13	16	0.9	0.9	15.3333	0.9	0.0586957	9.01e-05
DDX17_HUMAN	DDX17_HUMAN	Q92841	DDX17	Probable ATP-dependent RNA helicase DDX17 - Homo sapiens (Human)	12	4	6	27	27	7.33333	27	3.68182	0.000126776
DDX21_HUMAN	DDX21_HUMAN	Q9NR30	DDX21	Nucleolar RNA helicase 2 - Homo sapiens (Human)	0.9	0.9	0.9	9	7	0.9	8	8.88889	0.000610528
DDX39_HUMAN	DDX39_HUMAN	O00148	DDX39	ATP-dependent RNA helicase DDX39 - Homo sapiens (Human)	11	6	8	30	27	8.33333	28.5	3.42	0.000146794
DDX3X_HUMAN	DDX3X_HUMAN	O00571	DDX3X	ATP-dependent RNA helicase DDX3X - Homo sapiens (Human)	1	3	3	13	10	2.33333	11.5	4.92857	0.000597183
DDX5_HUMAN	DDX5_HUMAN	P17844	DDX5	Probable ATP-dependent RNA helicase DDX5 - Homo sapiens (Human)	1	1	1	7	7	1	7	7	0.0008474
DERM_HUMAN	DERM_HUMAN	Q07507	DPT	Dermatopontin	0.9	0.9	0.9	7	7	0.9	7	7.77778	0.0008474
DESM_HUMAN	DESM_HUMAN	P17661	DES	Desmin - Homo sapiens (Human)	12	14	13	101	103	13	102	7.84615	0
DHX15_HUMAN	DHX15_HUMAN	O43143	DHX15	Putative pre-mRNA-splicing factor ATP-dependent RNA helicase DHX15 - Homo sapiens (Human)	8	4	8	26	21	6.66667	23.5	3.525	0.000206846
DHX9_HUMAN	DHX9_HUMAN	Q08211	DHX9	ATP-dependent RNA helicase A - Homo sapiens (Human)	17	12	12	57	43	13.6667	50	3.65854	3.34e-05
DNJCD_HUMAN	DJC13_HUMAN	O75165	DNAJC13	DnaJ homolog subfamily C member 13 - Homo sapiens (Human)	14	17	17	1	0.9	16	0.95	0.059375	9.01e-05
DPP4_HUMAN	DPP4_HUMAN	P27487	DPP4	Dipeptidyl peptidase 4 - Homo sapiens (Human)	31	25	19	0.9	0.9	25	0.9	0.036	1.67e-05
DUT_HUMAN	DUT_HUMAN	P33316	DUT	Deoxyuridine 5'-triphosphate nucleotidohydrolase, mitochondrial precursor - Homo sapiens (Human)	2	2	2	16	13	2	14.5	7.25	0.000160139
DYHC_HUMAN	DYHC1_HUMAN	Q14204	DYNC1H1	Dynein heavy chain, cytosolic - Homo sapiens (Human)	167	186	149	20	23	167.333	21.5	0.128486	0
EEA1_HUMAN	EEA1_HUMAN	Q15075	EEA1	Early endosome antigen 1 - Homo sapiens (Human)	7	12	11	2	0.9	10	1.45	0.145	0.000563821
EF1A1_HUMAN	EF1A1_HUMAN	P68104	EEF1A1	Elongation factor 1-alpha 1 - Homo sapiens (Human)	58	46	50	134	110	51.3333	122	2.37662	2e-05
EF1G_HUMAN	EF1G_HUMAN	P26641	EEF1G	Elongation factor 1-gamma - Homo sapiens (Human)	7	19	5	27	28	10.3333	27.5	2.66129	0.000326949
EF2_HUMAN	EF2_HUMAN	P13639	EEF2	Elongation factor 2 - Homo sapiens (Human)	16	16	23	98	61	18.3333	79.5	4.33636	3.34e-06
EFTU_HUMAN	EFTU_HUMAN	P49411	TUFM	Elongation factor Tu, mitochondrial precursor - Homo sapiens (Human)	13	5	10	81	75	9.33333	78	8.35714	0
ENOA_HUMAN	ENOA_HUMAN	P06733	ENO1	Alpha-enolase - Homo sapiens (Human)	23	17	22	278	238	20.6667	258	12.4839	0
ENOG_HUMAN	ENOG_HUMAN	P09104	ENO2	Gamma-enolase - Homo sapiens (Human)	8	9	8	0.9	0.9	8.33333	0.9	0.108	0.000633882
ENPL_HUMAN	ENPL_HUMAN	P14625	HSP90B1	Endoplasmin precursor - Homo sapiens (Human)	27	33	28	80	76	29.3333	78	2.65909	3.34e-05
ETFA_HUMAN	ETFA_HUMAN	P13804	ETFA	Electron transfer flavoprotein subunit alpha, mitochondrial precursor - Homo sapiens (Human)	5	9	21	43	29	11.6667	36	3.08571	0.000100087
FAS_HUMAN	FAS_HUMAN	P49327	FASN	Fatty acid synthase - Homo sapiens (Human)	61	69	57	10	5	62.3333	7.5	0.120321	0
FIBA_HUMAN	FIBA_HUMAN	P02671	FGA	Fibrinogen alpha chain	0.9	0.9	0.9	8	14	0.9	11	12.2222	0.000193501
FIBB_HUMAN	FIBB_HUMAN	P02675	FGB	Fibrinogen beta chain	0.9	0.9	0.9	14	13	0.9	13.5	15	8.67e-05
FIBG_HUMAN	FIBG_HUMAN	P02679	FGG	Fibrinogen gamma chain	0.9	0.9	0.9	18	7	0.9	12.5	13.8889	0.000113431
FINC_HUMAN	FINC_HUMAN	P02751	FN1	Fibronectin precursor - Homo sapiens (Human)	1	1	2	40	54	1.33333	47	35.25	0
FLNA_HUMAN	FLNA_HUMAN	P21333	FLNA	Filamin-A - Homo sapiens (Human)	124	127	118	44	28	123	36	0.292683	0
FUMH_HUMAN	FUMH_HUMAN	P07954	FH	Fumarate hydratase, mitochondrial precursor - Homo sapiens (Human)	9	5	7	28	39	7	33.5	4.78571	3.67e-05
G3P_HUMAN	G3P_HUMAN	P04406	GAPDH	Glyceraldehyde-3-phosphate dehydrogenase - Homo sapiens (Human)	34	44	33	339	283	37	311	8.40541	0
G6PI_HUMAN	G6PI_HUMAN	P06744	GPI	Glucose-6-phosphate isomerase - Homo sapiens (Human)	16	11	17	79	70	14.6667	74.5	5.07955	0
GANAB_HUMAN	GANAB_HUMAN	Q14697	GANAB	Neutral alpha-glucosidase AB precursor - Homo sapiens (Human)	26	22	15	6	7	21	6.5	0.309524	0.000440381
GBLP_HUMAN	GBLP_HUMAN	P63244	GNB2L1	Guanine nucleotide-binding protein subunit beta-2-like 1 - Homo sapiens (Human)	12	12	15	44	43	13	43.5	3.34615	7.34e-05
GDIB_HUMAN	GDIB_HUMAN	P50395	GDI2	Rab GDP dissociation inhibitor beta - Homo sapiens (Human)	12	15	12	39	37	13	38	2.92308	0.000100087
GDN_HUMAN	GDN_HUMAN	P07093	SERPINE2	Glia-derived nexin precursor - Homo sapiens (Human)	0.9	0.9	0.9	60	43	0.9	51.5	57.2222	0
GELS_HUMAN	GELS_HUMAN	P06396	GSN	Gelsolin precursor - Homo sapiens (Human)	43	48	44	80	78	45	79	1.75556	0.000250216
GGH_HUMAN	GGH_HUMAN	Q92820	GGH	Gamma-glutamyl hydrolase precursor - Homo sapiens (Human)	10	9	6	2	1	8.33333	1.5	0.18	0.00097084
GPX1_HUMAN	GPX1_HUMAN	P07203	GPX1	Glutathione peroxidase 1 - Homo sapiens (Human)	8	9	8	0.9	0.9	8.33333	0.9	0.108	0.000633882
GRP75_HUMAN	GRP75_HUMAN	P38646	HSPA9	Stress-70 protein, mitochondrial precursor - Homo sapiens (Human)	21	31	28	101	81	26.6667	91	3.4125	3.34e-06
GRP78_HUMAN	GRP78_HUMAN	P11021	HSPA5	78 kDa glucose-regulated protein precursor - Homo sapiens (Human)	31	36	41	86	94	36	90	2.5	3.34e-05
GSTO1_HUMAN	GSTO1_HUMAN	P78417	GSTO1	Glutathione transferase omega-1 - Homo sapiens (Human)	3	0.9	3	31	29	2.3	30	13.0435	2e-05
GSTP1_HUMAN	GSTP1_HUMAN	P09211	GSTP1	Glutathione S-transferase P - Homo sapiens (Human)	31	33	34	58	85	32.6667	71.5	2.18878	8.34e-05
H11_HUMAN	H11_HUMAN	Q02539	HIST1H1A	Histone H1.1 - Homo sapiens (Human)	9	8	10	39	36	9	37.5	4.16667	4.67e-05
H12_HUMAN	H12_HUMAN	P16403	HIST1H1C	Histone H1.2 - Homo sapiens (Human)	9	12	10	58	55	10.3333	56.5	5.46774	3.34e-06
H1X_HUMAN	H1X_HUMAN	Q92522	H1FX	Histone H1x - Homo sapiens (Human)	0.9	0.9	0.9	9	6	0.9	7.5	8.33333	0.000710615
H2A1A_HUMAN	H2A1A_HUMAN	Q96QV6	HIST1H2AA	Histone H2A type 1-A - Homo sapiens (Human)	5	7	11	92	79	7.66667	85.5	11.1522	0
H2A1B_HUMAN	H2A1B_HUMAN	P04908	HIST1H2AB	Histone H2A type 1-B - Homo sapiens (Human)	0.9	0.9	0.9	169	230	0.9	199.5	221.667	0
H2AV_HUMAN	H2AV_HUMAN	Q71UI9	H2AFV	Histone H2AV - Homo sapiens (Human)	3	2	1	21	14	2	17.5	8.75	7.67e-05
H2AW_HUMAN	H2AW_HUMAN	Q9P0M6	H2AFY2	Core histone macro-H2A.2 - Homo sapiens (Human)	0.9	0.9	0.9	14	13	0.9	13.5	15	8.67e-05
H2AY_HUMAN	H2AY_HUMAN	O75367	H2AFY	Core histone macro-H2A.1 - Homo sapiens (Human)	1	1	1	31	26	1	28.5	28.5	3.34e-06
H2B1A_HUMAN	H2B1A_HUMAN	Q96A08	HIST1H2BA	Histone H2B type 1-A - Homo sapiens (Human)	1	3	2	25	23	2	24	12	3.34e-05
H2B1B_HUMAN	H2B1B_HUMAN	P33778	HIST1H2BB	Histone H2B type 1-B - Homo sapiens (Human)	20	16	22	435	399	19.3333	417	21.569	0
H31T_HUMAN	H31T_HUMAN	Q16695	HIST3H3	Histone H3.1t - Homo sapiens (Human)	4	2	2	10	12	2.66667	11	4.125	0.000807365
H4_HUMAN	H4_HUMAN	P62805	HIST1H4A	Histone H4 - Homo sapiens (Human)	34	23	23	164	171	26.6667	167.5	6.28125	0
H90B2_HUMAN	H90B2_HUMAN	Q58FF8	HSP90AB2P	Putative heat shock protein HSP 90-beta 2	0.9	0.9	0.9	44	30	0.9	37	41.1111	0
H90B3_HUMAN	H90B3_HUMAN	Q58FF7	HSP90AB3P	Putative heat shock protein HSP 90-beta-3	0.9	0.9	0.9	63	63	0.9	63	70	0
HBA_HUMAN	HBA_HUMAN	P69905	HBA1	Hemoglobin subunit alpha - Homo sapiens (Human)	0.9	0.9	0.9	111	109	0.9	110	122.222	0
HBB_HUMAN	HBB_HUMAN	P68871	HBB	Hemoglobin subunit beta - Homo sapiens (Human)	2	1	0.9	212	246	1.3	229	176.154	0
HBD_HUMAN	HBD_HUMAN	P02042	HBD	Hemoglobin subunit delta	0.9	0.9	0.9	6	12	0.9	9	10	0.000373657
HCD2_HUMAN	HCD2_HUMAN	Q99714	HSD17B10	3-hydroxyacyl-CoA dehydrogenase type-2 - Homo sapiens (Human)	4	0.9	2	74	77	2.3	75.5	32.8261	0
HEXA_HUMAN	HEXA_HUMAN	P06865	HEXA	Beta-hexosaminidase alpha chain precursor - Homo sapiens (Human)	7	7	7	22	35	7	28.5	4.07143	8.67e-05
HMG1X_HUMAN	HMGLX_HUMAN	Q9UGV6	HMG1L10	High mobility group protein 1-like 10 - Homo sapiens (Human)	8	7	8	0.9	0.9	7.66667	0.9	0.117391	0.000780675
HMGB1_HUMAN	HMGB1_HUMAN	P09429	HMGB1	High mobility group protein B1 - Homo sapiens (Human)	2	2	2	22	16	2	19	9.5	7.67e-05
HNRCL_HUMAN	HNRCL_HUMAN	O60812	HNRNPCL1	Heterogeneous nuclear ribonucleoprotein C-like 1 - Homo sapiens (Human)	6	3	5	46	34	4.66667	40	8.57143	1e-05
HNRH1_HUMAN	HNRH1_HUMAN	P31943	HNRNPH1	Heterogeneous nuclear ribonucleoprotein H - Homo sapiens (Human)	15	9	8	51	50	10.6667	50.5	4.73438	2e-05
HNRL2_HUMAN	HNRL2_HUMAN	Q1KMD3	HNRNPUL2	Heterogeneous nuclear ribonucleoprotein U-like protein 2 - Homo sapiens (Human)	1	4	0.9	23	18	1.96667	20.5	10.4237	6.01e-05
HNRPC_HUMAN	HNRPC_HUMAN	P07910	HNRNPC	Heterogeneous nuclear ribonucleoproteins C1/C2 - Homo sapiens (Human)	3	6	4	34	43	4.33333	38.5	8.88462	1e-05
HNRPD_HUMAN	HNRPD_HUMAN	Q14103	HNRNPD	Heterogeneous nuclear ribonucleoprotein D0 - Homo sapiens (Human)	4	6	5	41	37	5	39	7.8	1e-05
HNRPK_HUMAN	HNRPK_HUMAN	P61978	HNRNPK	Heterogeneous nuclear ribonucleoprotein K - Homo sapiens (Human)	51	32	45	94	94	42.6667	94	2.20312	3.67e-05
HNRPM_HUMAN	HNRPM_HUMAN	P52272	HNRNPM	Heterogeneous nuclear ribonucleoprotein M - Homo sapiens (Human)	25	19	19	43	49	21	46	2.19048	0.000236872
HNRPR_HUMAN	HNRPR_HUMAN	O43390	HNRNPR	Heterogeneous nuclear ribonucleoprotein R - Homo sapiens (Human)	3	3	4	20	26	3.33333	23	6.9	7.67e-05
HNRPU_HUMAN	HNRPU_HUMAN	Q00839	HNRNPU	Heterogeneous nuclear ribonucleoprotein U - Homo sapiens (Human)	15	17	9	71	47	13.6667	59	4.31707	2e-05
HP1B3_HUMAN	HP1B3_HUMAN	Q5SSJ5	HP1BP3	Heterochromatin protein 1-binding protein 3	0.9	0.9	0.9	14	13	0.9	13.5	15	8.67e-05
HPT_HUMAN	HPT_HUMAN	P00738	HP	Haptoglobin	0.9	0.9	0.9	20	20	0.9	20	22.2222	3.34e-05
HPTR_HUMAN	HPTR_HUMAN	P00739	HPR	Haptoglobin-related protein precursor - Homo sapiens (Human)	1	0.9	1	10	11	0.966667	10.5	10.8621	0.000206846
HS902_HUMAN	HS902_HUMAN	Q14568	HSP90AA2	Putative heat shock protein HSP 90-alpha A2	0.9	0.9	0.9	11	4	0.9	7.5	8.33333	0.000710615
HS905_HUMAN	HS905_HUMAN	Q58FG0	HSP90AA5P	Putative heat shock protein HSP 90-alpha A5	0.9	0.9	0.9	11	6	0.9	8.5	9.44444	0.000463734
HS90A_HUMAN	HS90A_HUMAN	P07900	HSP90AA1	Heat shock protein HSP 90-alpha - Homo sapiens (Human)	52	51	45	121	114	49.3333	117.5	2.38176	2e-05
HS90B_HUMAN	HS90B_HUMAN	P08238	HSP90AB1	Heat shock protein HSP 90-beta - Homo sapiens (Human)	11	10	18	96	81	13	88.5	6.80769	0
HSP72_HUMAN	HSP72_HUMAN	P54652	HSPA2	Heat shock-related 70 kDa protein 2 - Homo sapiens (Human)	25	16	17	46	36	19.3333	41	2.12069	0.000343631
HSP7C_HUMAN	HSP7C_HUMAN	P11142	HSPA8	Heat shock cognate 71 kDa protein - Homo sapiens (Human)	31	29	29	141	118	29.6667	129.5	4.36517	0
HSPB1_HUMAN	HSPB1_HUMAN	P04792	HSPB1	Heat shock protein beta-1 - Homo sapiens (Human)	16	1	11	30	19	9.33333	24.5	2.625	0.00052045
HYEP_HUMAN	HYEP_HUMAN	P07099	EPHX1	Epoxide hydrolase 1 - Homo sapiens (Human)	15	10	7	0.9	0.9	10.6667	0.9	0.084375	0.000266898
IF16_HUMAN	IF16_HUMAN	Q16666	IFI16	Gamma-interferon-inducible protein Ifi-16 - Homo sapiens (Human)	2	3	2	22	24	2.33333	23	9.85714	3.34e-05
IF35_HUMAN	EIF3F_HUMAN	O00303	EIF3F	Eukaryotic translation initiation factor 3 subunit 5 - Homo sapiens (Human)	4	2	1	15	11	2.33333	13	5.57143	0.000280242
IF3A_HUMAN	EIF3A_HUMAN	Q14152	EIF3A	Eukaryotic translation initiation factor 3 subunit 10 - Homo sapiens (Human)	12	18	18	35	30	16	32.5	2.03125	0.000787348
IF4A1_HUMAN	IF4A1_HUMAN	P60842	EIF4A1	Eukaryotic initiation factor 4A-I - Homo sapiens (Human)	14	11	14	63	57	13	60	4.61538	1e-05
IF4G1_HUMAN	IF4G1_HUMAN	Q04637	EIF4G1	Eukaryotic translation initiation factor 4 gamma 1 - Homo sapiens (Human)	4	12	9	0.9	1	8.33333	0.95	0.114	0.000633882
IF5A1_HUMAN	IF5A1_HUMAN	P63241	EIF5A	Eukaryotic translation initiation factor 5A-1 - Homo sapiens (Human)	1	5	1	27	31	2.33333	29	12.4286	2e-05
IGHG1_HUMAN	IGHG1_HUMAN	P01857	IGHG1	Ig gamma-1 chain C region - Homo sapiens (Human)	2	0.9	0.9	45	37	1.26667	41	32.3684	0
IGHG2_HUMAN	IGHG2_HUMAN	P01859	IGHG2	Ig gamma-2 chain C region	0.9	0.9	0.9	14	15	0.9	14.5	16.1111	7.67e-05
ILF2_HUMAN	ILF2_HUMAN	Q12905	ILF2	Interleukin enhancer-binding factor 2 - Homo sapiens (Human)	7	6	4	33	51	5.66667	42	7.41176	1e-05
K0152_HUMAN	MLEC_HUMAN	Q14165	MLEC	Uncharacterized protein KIAA0152 precursor - Homo sapiens (Human)	8	10	8	0.9	1	8.66667	0.95	0.109615	0.000560485
K1C10_HUMAN	K1C10_HUMAN	P13645	KRT10	Keratin, type I cytoskeletal 10 - Homo sapiens (Human)	82	82	79	345	287	81	316	3.90123	0
K1C9_HUMAN	K1C9_HUMAN	P35527	KRT9	Keratin, type I cytoskeletal 9 - Homo sapiens (Human)	41	49	59	179	121	49.6667	150	3.02013	0
K22E_HUMAN	K22E_HUMAN	P35908	KRT2	Keratin, type II cytoskeletal 2 epidermal - Homo sapiens (Human)	53	51	61	205	211	55	208	3.78182	0
K2C1_HUMAN	K2C1_HUMAN	P04264	KRT1	Keratin, type II cytoskeletal 1 - Homo sapiens (Human)	96	83	82	311	284	87	297.5	3.41954	0
KAC_HUMAN	IGKC_HUMAN	P01834	IGKC	Ig kappa chain C region - Homo sapiens (Human)	3	11	3	63	63	5.66667	63	11.1176	0
KPYM_HUMAN	KPYM_HUMAN	P14618	PKM2	Pyruvate kinase isozymes M1/M2 - Homo sapiens (Human)	65	86	74	386	351	75	368.5	4.91333	0
KRT81_HUMAN	KRT81_HUMAN	Q14533	KRT81	Keratin type II cuticular Hb1 - Homo sapiens (Human)	16	17	15	0.9	0.9	16	0.9	0.05625	9.01e-05
KTN1_HUMAN	KTN1_HUMAN	Q86UP2	KTN1	Kinectin - Homo sapiens (Human)	14	15	20	3	1	16.3333	2	0.122449	0.00012344
KU70_HUMAN	KU70_HUMAN	P12956	XRCC6	ATP-dependent DNA helicase 2 subunit 1 - Homo sapiens (Human)	10	16	10	136	123	12	129.5	10.7917	0
KU86_HUMAN	KU86_HUMAN	P13010	XRCC5	ATP-dependent DNA helicase 2 subunit 2 - Homo sapiens (Human)	9	10	6	59	42	8.33333	50.5	6.06	1e-05
LA_HUMAN	LA_HUMAN	P05455	SSB	Lupus La protein - Homo sapiens (Human)	7	4	13	35	30	8	32.5	4.0625	7.67e-05
LDH6A_HUMAN	LDH6A_HUMAN	Q6ZMR3	LDHAL6A	L-lactate dehydrogenase A-like 6A	0.9	0.9	0.9	35	39	0.9	37	41.1111	0
LDHA_HUMAN	LDHA_HUMAN	P00338	LDHA	L-lactate dehydrogenase A chain - Homo sapiens (Human)	22	14	11	156	155	15.6667	155.5	9.92553	0
LDHB_HUMAN	LDHB_HUMAN	P07195	LDHB	L-lactate dehydrogenase B chain - Homo sapiens (Human)	18	20	20	114	121	19.3333	117.5	6.07759	0
LEG3_HUMAN	LEG3_HUMAN	P17931	LGALS3	Galectin-3 - Homo sapiens (Human)	20	16	23	3	2	19.6667	2.5	0.127119	9.01e-05
LG3BP_HUMAN	LG3BP_HUMAN	Q08380	LGALS3BP	Galectin-3-binding protein precursor - Homo sapiens (Human)	5	7	2	33	31	4.66667	32	6.85714	3.34e-05
LMNA_HUMAN	LMNA_HUMAN	P02545	LMNA	Lamin-A/C - Homo sapiens (Human)	97	99	81	183	178	92.3333	180.5	1.95487	2e-05
LMNB1_HUMAN	LMNB1_HUMAN	P20700	LMNB1	Lamin-B1 - Homo sapiens (Human)	9	7	9	0.9	0.9	8.33333	0.9	0.108	0.000633882
LUM_HUMAN	LUM_HUMAN	P51884	LUM	Lumican	0.9	0.9	0.9	130	106	0.9	118	131.111	0
LYAG_HUMAN	LYAG_HUMAN	P10253	GAA	Lysosomal alpha-glucosidase precursor - Homo sapiens (Human)	1	1	1	11	11	1	11	11	0.000193501
MARCS_HUMAN	MARCS_HUMAN	P29966	MARCKS	Myristoylated alanine-rich C-kinase substrate - Homo sapiens (Human)	17	12	10	1	0.9	13	0.95	0.0730769	0.00012344
MBB1A_HUMAN	MBB1A_HUMAN	Q9BQG0	MYBBP1A	Myb-binding protein 1A - Homo sapiens (Human)	1	0.9	2	17	21	1.3	19	14.6154	3.67e-05
MDHM_HUMAN	MDHM_HUMAN	P40926	MDH2	Malate dehydrogenase, mitochondrial precursor - Homo sapiens (Human)	11	15	13	280	262	13	271	20.8462	0
MIF_HUMAN	MIF_HUMAN	P14174	MIF	Macrophage migration inhibitory factor - Homo sapiens (Human)	0.9	0.9	0.9	20	20	0.9	20	22.2222	3.34e-05
MIME_HUMAN	MIME_HUMAN	P20774	OGN	Mimecan	0.9	0.9	0.9	18	11	0.9	14.5	16.1111	7.67e-05
MLRM_HUMAN	MRLC3_HUMAN	P19105	MYL12A	Myosin regulatory light chain 2, nonsarcomeric - Homo sapiens (Human)	10	9	6	0.9	0.9	8.33333	0.9	0.108	0.000633882
MTAP_HUMAN	MTAP_HUMAN	Q13126	MTAP	S-methyl-5-thioadenosine phosphorylase - Homo sapiens (Human)	2	1	5	26	20	2.66667	23	8.625	3.67e-05
MVP_HUMAN	MVP_HUMAN	Q14764	MVP	Major vault protein - Homo sapiens (Human)	22	19	19	2	0.9	20	1.45	0.0725	3.34e-05
MY18A_HUMAN	MY18A_HUMAN	Q92614	MYO18A	Myosin-XVIIIa - Homo sapiens (Human)	4	11	7	0.9	0.9	7.33333	0.9	0.122727	0.00094415
MYH10_HUMAN	MYH10_HUMAN	P35580	MYH10	Myosin-10 - Homo sapiens (Human)	66	74	62	24	25	67.3333	24.5	0.363861	3.34e-05
MYO1D_HUMAN	MYO1D_HUMAN	O94832	MYO1D	Myosin-Id - Homo sapiens (Human)	18	19	17	3	0.9	18	1.95	0.108333	9.01e-05
MYO5A_HUMAN	MYO5A_HUMAN	Q9Y4I1	MYO5A	Myosin-Va - Homo sapiens (Human)	28	25	26	3	4	26.3333	3.5	0.132911	3.34e-05
MYOF_HUMAN	MYOF_HUMAN	Q9NZM1	MYOF	Myoferlin - Homo sapiens (Human)	16	13	18	1	0.9	15.6667	0.95	0.0606383	9.01e-05
NACA_HUMAN	NACA_HUMAN	Q13765	NACA	Nascent polypeptide-associated complex subunit alpha - Homo sapiens (Human)	5	7	7	34	36	6.33333	35	5.52632	3.34e-05
NB5R3_HUMAN	NB5R3_HUMAN	P00387	CYB5R3	NADH-cytochrome b5 reductase 3 - Homo sapiens (Human)	12	15	17	37	24	14.6667	30.5	2.07955	0.000787348
NCPR_HUMAN	NCPR_HUMAN	P16435	POR	NADPH--cytochrome P450 reductase - Homo sapiens (Human)	6	6	10	0.9	1	7.33333	0.95	0.129545	0.00094415
NDK8_HUMAN	NDK8_HUMAN	O60361	NME2P1	Putative nucleoside diphosphate kinase - Homo sapiens (Human)	6	5	6	22	19	5.66667	20.5	3.61765	0.000270234
NDUS1_HUMAN	NDUS1_HUMAN	P28331	NDUFS1	NADH-ubiquinone oxidoreductase 75 kDa subunit, mitochondrial precursor - Homo sapiens (Human)	9	7	9	0.9	0.9	8.33333	0.9	0.108	0.000633882
NEST_HUMAN	NEST_HUMAN	P48681	NES	Nestin - Homo sapiens (Human)	9	6	1	30	34	5.33333	32	6	3.34e-05
NEUL_HUMAN	NEUL_HUMAN	Q9BYT8	NLN	Neurolysin, mitochondrial precursor - Homo sapiens (Human)	0.9	2	1	10	6	1.3	8	6.15385	0.000807365
NOL5_HUMAN	NOL5_HUMAN	Q9Y2X3	NOP58	Nucleolar protein 5 - Homo sapiens (Human)	3	0.9	5	30	24	2.96667	27	9.10112	3.34e-05
NOL5A_HUMAN	NOL5A_HUMAN	O00567	NOP56	Nucleolar protein 5A - Homo sapiens (Human)	6	4	3	31	22	4.33333	26.5	6.11538	6.01e-05
NONO_HUMAN	NONO_HUMAN	Q15233	NONO	Non-POU domain-containing octamer-binding protein - Homo sapiens (Human)	6	6	7	32	30	6.33333	31	4.89474	6.01e-05
NP1L1_HUMAN	NP1L1_HUMAN	P55209	NAP1L1	Nucleosome assembly protein 1-like 1 - Homo sapiens (Human)	5	4	4	19	13	4.33333	16	3.69231	0.000443717
NPM_HUMAN	NPM_HUMAN	P06748	NPM1	Nucleophosmin - Homo sapiens (Human)	14	22	33	133	101	23	117	5.08696	0
NQO1_HUMAN	NQO1_HUMAN	P15559	NQO1	NAD(P)H dehydrogenase [quinone] 1 - Homo sapiens (Human)	11	11	12	0.9	0.9	11.3333	0.9	0.0794118	0.000200173
NUCL_HUMAN	NUCL_HUMAN	P19338	NCL	Nucleolin - Homo sapiens (Human)	20	13	19	147	132	17.3333	139.5	8.04808	0
ODO2_HUMAN	ODO2_HUMAN	P36957	DLST	Dihydrolipoyllysine-residue succinyltransferase component of 2-oxoglutarate dehydrogenase complex, mitochondrial precursor - Homo sapiens (Human)	3	3	5	22	22	3.66667	22	6	7.67e-05
PA2G4_HUMAN	PA2G4_HUMAN	Q9UQ80	PA2G4	Proliferation-associated protein 2G4 - Homo sapiens (Human)	15	6	16	29	26	12.3333	27.5	2.22973	0.000740641
PAIRB_HUMAN	PAIRB_HUMAN	Q8NC51	SERBP1	Plasminogen activator inhibitor 1 RNA-binding protein - Homo sapiens (Human)	2	3	3	17	11	2.66667	14	5.25	0.00027357
PCBP1_HUMAN	PCBP1_HUMAN	Q15365	PCBP1	Poly(rC)-binding protein 1 - Homo sapiens (Human)	18	12	21	75	56	17	65.5	3.85294	2e-05
PCNA_HUMAN	PCNA_HUMAN	P12004	PCNA	Proliferating cell nuclear antigen - Homo sapiens (Human)	3	5	8	33	33	5.33333	33	6.1875	3.34e-05
PDIA3_HUMAN	PDIA3_HUMAN	P30101	PDIA3	Protein disulfide-isomerase A3 precursor - Homo sapiens (Human)	26	21	19	66	57	22	61.5	2.79545	3.67e-05
PDIA6_HUMAN	PDIA6_HUMAN	Q15084	PDIA6	Protein disulfide-isomerase A6 precursor - Homo sapiens (Human)	15	4	9	49	50	9.33333	49.5	5.30357	2e-05
PERI_HUMAN	PERI_HUMAN	P41219	PRPH	Peripherin - Homo sapiens (Human)	8	6	9	57	53	7.66667	55	7.17391	3.34e-06
PGBM_HUMAN	PGBM_HUMAN	P98160	HSPG2	Basement membrane-specific heparan sulfate proteoglycan core protein precursor - Homo sapiens (Human)	0.9	0.9	0.9	17	11	0.9	14	15.5556	8.34e-05
PGK1_HUMAN	PGK1_HUMAN	P00558	PGK1	Phosphoglycerate kinase 1 - Homo sapiens (Human)	23	29	33	139	147	28.3333	143	5.04706	0
PGS1_HUMAN	PGS1_HUMAN	P21810	BGN	Biglycan	0.9	0.9	0.9	55	44	0.9	49.5	55	0
PHB_HUMAN	PHB_HUMAN	P35232	PHB	Prohibitin - Homo sapiens (Human)	13	13	16	32	33	14	32.5	2.32143	0.0004237
PHB2_HUMAN	PHB2_HUMAN	Q99623	PHB2	Prohibitin-2 - Homo sapiens (Human)	8	11	13	35	21	10.6667	28	2.625	0.000326949
PIR_HUMAN	PIR_HUMAN	O00625	PIR	Pirin - Homo sapiens (Human)	8	16	10	0.9	0.9	11.3333	0.9	0.0794118	0.000200173
PLD3_HUMAN	PLD3_HUMAN	Q8IV08	PLD3	Phospholipase D3 - Homo sapiens (Human)	5	5	5	22	23	5	22.5	4.5	0.00012344
PME17_HUMAN	PME17_HUMAN	P40967	SILV	Melanocyte protein Pmel 17 precursor - Homo sapiens (Human)	43	55	49	13	7	49	10	0.204082	1.67e-05
POSTN_HUMAN	POSTN_HUMAN	Q15063	POSTN	Periostin	0.9	0.9	0.9	310	265	0.9	287.5	319.444	0
PPIA_HUMAN	PPIA_HUMAN	P62937	PPIA	Peptidyl-prolyl cis-trans isomerase A - Homo sapiens (Human)	15	13	8	117	97	12	107	8.91667	0
PPIB_HUMAN	PPIB_HUMAN	P23284	PPIB	Peptidyl-prolyl cis-trans isomerase B precursor - Homo sapiens (Human)	16	20	15	49	64	17	56.5	3.32353	3.34e-05
PRDX2_HUMAN	PRDX2_HUMAN	P32119	PRDX2	Peroxiredoxin-2 - Homo sapiens (Human)	14	11	9	45	41	11.3333	43	3.79412	3.67e-05
PRDX6_HUMAN	PRDX6_HUMAN	P30041	PRDX6	Peroxiredoxin-6 - Homo sapiens (Human)	6	1	2	22	17	3	19.5	6.5	8.67e-05
PRELP_HUMAN	PRELP_HUMAN	P51888	PRELP	Prolargin	0.9	0.9	0.9	11	9	0.9	10	11.1111	0.000253553
PROF1_HUMAN	PROF1_HUMAN	P07737	PFN1	Profilin-1 - Homo sapiens (Human)	21	19	20	109	105	20	107	5.35	0
PSB2_HUMAN	PSB2_HUMAN	P49721	PSMB2	Proteasome subunit beta type-2 - Homo sapiens (Human)	6	4	7	15	18	5.66667	16.5	2.91176	0.000807365
PTBP1_HUMAN	PTBP1_HUMAN	P26599	PTBP1	Polypyrimidine tract-binding protein 1 - Homo sapiens (Human)	15	8	10	76	58	11	67	6.09091	0
PTRF_HUMAN	PTRF_HUMAN	Q6NZI2	PTRF	Polymerase I and transcript release factor - Homo sapiens (Human)	3	4	7	14	18	4.66667	16	3.42857	0.000607192
PUR9_HUMAN	PUR9_HUMAN	P31939	ATIC	Bifunctional purine biosynthesis protein PURH [Includes: Phosphoribosylaminoimidazolecarboxamide formyltransferase - Homo sapiens (Human)	9	12	11	34	22	10.6667	28	2.625	0.000326949
PYGB_HUMAN	PYGB_HUMAN	P11216	PYGB	Glycogen phosphorylase, brain form - Homo sapiens (Human)	21	17	13	35	38	17	36.5	2.14706	0.000443717
PYGL_HUMAN	PYGL_HUMAN	P06737	PYGL	Glycogen phosphorylase, liver form - Homo sapiens (Human)	11	12	6	0.9	0.9	9.66667	0.9	0.0931034	0.000360312
Q562R1_HUMAN	ACTBL_HUMAN	Q562R1	ACTBL2	Actin-like protein - Homo sapiens (Human)	0.9	0.9	0.9	6	10	0.9	8	8.88889	0.000610528
Q8IWP6_HUMAN	Q8IWP6_HUMAN	Q8IWP6	N/A	Class IVb beta tubulin - Homo sapiens (Human)	0.9	0.9	0.9	12	9	0.9	10.5	11.6667	0.000206846
RALY_HUMAN	RALY_HUMAN	Q9UKM9	RALY	RNA-binding protein Raly - Homo sapiens (Human)	24	8	9	5	1	13.6667	3	0.219512	0.000530459
RAN_HUMAN	RAN_HUMAN	P62826	RAN	GTP-binding nuclear protein Ran - Homo sapiens (Human)	8	5	10	43	37	7.66667	40	5.21739	3.34e-05
RETST_HUMAN	RETST_HUMAN	Q6NUM9	RETSAT	All-trans-retinol 13,14-reductase precursor - Homo sapiens (Human)	8	5	9	0.9	0.9	7.33333	0.9	0.122727	0.00094415
RINI_HUMAN	RINI_HUMAN	P13489	RNH1	Ribonuclease inhibitor - Homo sapiens (Human)	6	5	8	22	24	6.33333	23	3.63158	0.000206846
RL10_HUMAN	RL10_HUMAN	P27635	RPL10	60S ribosomal protein L10 - Homo sapiens (Human)	2	0.9	0.9	15	10	1.26667	12.5	9.86842	0.00017682
RL10A_HUMAN	RL10A_HUMAN	P62906	RPL10A	60S ribosomal protein L10a - Homo sapiens (Human)	3	0.9	3	19	22	2.3	20.5	8.91304	6.34e-05
RL11_HUMAN	RL11_HUMAN	P62913	RPL11	60S ribosomal protein L11 - Homo sapiens (Human)	3	3	2	17	16	2.66667	16.5	6.1875	0.000160139
RL12_HUMAN	RL12_HUMAN	P30050	RPL12	60S ribosomal protein L12 - Homo sapiens (Human)	5	3	3	38	40	3.66667	39	10.6364	3.34e-06
RL13_HUMAN	RL13_HUMAN	P26373	RPL13	60S ribosomal protein L13 - Homo sapiens (Human)	7	1	4	33	27	4	30	7.5	3.34e-05
RL15_HUMAN	RL15_HUMAN	P61313	RPL15	60S ribosomal protein L15 - Homo sapiens (Human)	1	0.9	3	17	14	1.63333	15.5	9.4898	9.68e-05
RL17_HUMAN	RL17_HUMAN	P18621	RPL17	60S ribosomal protein L17 - Homo sapiens (Human)	1	3	2	13	8	2	10.5	5.25	0.000657235
RL18_HUMAN	RL18_HUMAN	Q07020	RPL18	60S ribosomal protein L18 - Homo sapiens (Human)	5	4	6	29	38	5	33.5	6.7	3.34e-05
RL18A_HUMAN	RL18A_HUMAN	Q02543	RPL18A	60S ribosomal protein L18a - Homo sapiens (Human)	2	2	3	27	27	2.33333	27	11.5714	2e-05
RL1D1_HUMAN	RL1D1_HUMAN	O76021	RSL1D1	Ribosomal L1 domain-containing protein 1 - Homo sapiens (Human)	0.9	0.9	0.9	21	14	0.9	17.5	19.4444	3.67e-05
RL21_HUMAN	RL21_HUMAN	P46778	RPL21	60S ribosomal protein L21 - Homo sapiens (Human)	5	3	1	29	34	3	31.5	10.5	2e-05
RL22_HUMAN	RL22_HUMAN	P35268	RPL22	60S ribosomal protein L22 - Homo sapiens (Human)	4	3	1	20	17	2.66667	18.5	6.9375	9.68e-05
RL23_HUMAN	RL23_HUMAN	P62829	RPL23	60S ribosomal protein L23 - Homo sapiens (Human)	2	3	4	35	26	3	30.5	10.1667	2e-05
RL23A_HUMAN	RL23A_HUMAN	P62750	RPL23A	60S ribosomal protein L23a - Homo sapiens (Human)	3	1	3	17	15	2.33333	16	6.85714	0.000146794
RL24_HUMAN	RL24_HUMAN	P83731	RPL24	60S ribosomal protein L24 - Homo sapiens (Human)	4	3	0.9	22	19	2.63333	20.5	7.78481	7.67e-05
RL27A_HUMAN	RL27A_HUMAN	P46776	RPL27A	60S ribosomal protein L27a - Homo sapiens (Human)	0.9	0.9	0.9	28	21	0.9	24.5	27.2222	2e-05
RL3_HUMAN	RL3_HUMAN	P39023	RPL3	60S ribosomal protein L3 - Homo sapiens (Human)	5	7	15	26	20	9	23	2.55556	0.000660571
RL31_HUMAN	RL31_HUMAN	P62899	RPL31	60S ribosomal protein L31 - Homo sapiens (Human)	3	1	1	7	12	1.66667	9.5	5.7	0.000667244
RL37A_HUMAN	RL37A_HUMAN	P61513	RPL37A	60S ribosomal protein L37a	0.9	0.9	0.9	9	6	0.9	7.5	8.33333	0.000710615
RL4_HUMAN	RL4_HUMAN	P36578	RPL4	60S ribosomal protein L4 - Homo sapiens (Human)	5	2	13	62	79	6.66667	70.5	10.575	0
RL5_HUMAN	RL5_HUMAN	P46777	RPL5	60S ribosomal protein L5 - Homo sapiens (Human)	8	6	8	23	20	7.33333	21.5	2.93182	0.000443717
RL6_HUMAN	RL6_HUMAN	Q02878	RPL6	60S ribosomal protein L6 - Homo sapiens (Human)	11	8	7	54	25	8.66667	39.5	4.55769	3.34e-05
RL7_HUMAN	RL7_HUMAN	P18124	RPL7	60S ribosomal protein L7 - Homo sapiens (Human)	3	6	8	24	25	5.66667	24.5	4.32353	0.000100087
RL7A_HUMAN	RL7A_HUMAN	P62424	RPL7A	60S ribosomal protein L7a - Homo sapiens (Human)	7	11	5	42	44	7.66667	43	5.6087	2e-05
RL8_HUMAN	RL8_HUMAN	P62917	RPL8	60S ribosomal protein L8 - Homo sapiens (Human)	4	4	6	22	16	4.66667	19	4.07143	0.000236872
RL9_HUMAN	RL9_HUMAN	P32969	RPL9	60S ribosomal protein L9 - Homo sapiens (Human)	1	3	1	20	13	1.66667	16.5	9.9	7.67e-05
RLA0L_HUMAN	RLA0L_HUMAN	Q8NHW5	RPLP0P6	60S acidic ribosomal protein P0-like	0.9	0.9	0.9	96	82	0.9	89	98.8889	0
RLA1_HUMAN	RLA1_HUMAN	P05386	RPLP1	60S acidic ribosomal protein P1 - Homo sapiens (Human)	0.9	0.9	0.9	20	14	0.9	17	18.8889	4.67e-05
RLA2_HUMAN	RLA2_HUMAN	P05387	RPLP2	60S acidic ribosomal protein P2 - Homo sapiens (Human)	4	6	9	28	28	6.33333	28	4.42105	7.67e-05
ROA1_HUMAN	ROA1_HUMAN	P09651	HNRNPA1	Heterogeneous nuclear ribonucleoprotein A1 - Homo sapiens (Human)	8	10	8	1	2	8.66667	1.5	0.173077	0.000920796
ROA2_HUMAN	ROA2_HUMAN	P22626	HNRNPA2B1	Heterogeneous nuclear ribonucleoproteins A2/B1 - Homo sapiens (Human)	22	26	29	65	52	25.6667	58.5	2.27922	0.000100087
ROA3_HUMAN	ROA3_HUMAN	P51991	HNRNPA3	Heterogeneous nuclear ribonucleoprotein A3 - Homo sapiens (Human)	11	9	7	36	30	9	33	3.66667	7.67e-05
RS10_HUMAN	RS10_HUMAN	P46783	RPS10	40S ribosomal protein S10 - Homo sapiens (Human)	3	2	4	18	15	3	16.5	5.5	0.000193501
RS13_HUMAN	RS13_HUMAN	P62277	RPS13	40S ribosomal protein S13 - Homo sapiens (Human)	3	3	3	11	13	3	12	4	0.000740641
RS14_HUMAN	RS14_HUMAN	P62263	RPS14	40S ribosomal protein S14 - Homo sapiens (Human)	9	11	5	30	43	8.33333	36.5	4.38	3.67e-05
RS15_HUMAN	RS15_HUMAN	P62841	RPS15	40S ribosomal protein S15 - Homo sapiens (Human)	0.9	0.9	0.9	15	23	0.9	19	21.1111	3.34e-05
RS15A_HUMAN	RS15A_HUMAN	P62244	RPS15A	40S ribosomal protein S15a - Homo sapiens (Human)	0.9	3	3	20	11	2.3	15.5	6.73913	0.000160139
RS16_HUMAN	RS16_HUMAN	P62249	RPS16	40S ribosomal protein S16 - Homo sapiens (Human)	6	10	4	22	35	6.66667	28.5	4.275	7.67e-05
RS17_HUMAN	RS17_HUMAN	P08708	RPS17	40S ribosomal protein S17 - Homo sapiens (Human)	2	4	1	14	13	2.33333	13.5	5.78571	0.000270234
RS18_HUMAN	RS18_HUMAN	P62269	RPS18	40S ribosomal protein S18 - Homo sapiens (Human)	22	16	11	67	91	16.3333	79	4.83673	0
RS19_HUMAN	RS19_HUMAN	P39019	RPS19	40S ribosomal protein S19 - Homo sapiens (Human)	5	4	7	20	20	5.33333	20	3.75	0.000253553
RS2_HUMAN	RS2_HUMAN	P15880	RPS2	40S ribosomal protein S2 - Homo sapiens (Human)	5	2	5	52	43	4	47.5	11.875	0
RS23_HUMAN	RS23_HUMAN	P62266	RPS23	40S ribosomal protein S23 - Homo sapiens (Human)	3	3	1	12	9	2.33333	10.5	4.5	0.000774003
RS24_HUMAN	RS24_HUMAN	P62847	RPS24	40S ribosomal protein S24 - Homo sapiens (Human)	4	6	4	16	13	4.66667	14.5	3.10714	0.0008474
RS25_HUMAN	RS25_HUMAN	P62851	RPS25	40S ribosomal protein S25 - Homo sapiens (Human)	2	1	0.9	13	12	1.3	12.5	9.61538	0.00017682
RS26_HUMAN	RS26_HUMAN	P62854	RPS26	40S ribosomal protein S26	0.9	0.9	0.9	13	17	0.9	15	16.6667	7.67e-05
RS3_HUMAN	RS3_HUMAN	P23396	RPS3	40S ribosomal protein S3 - Homo sapiens (Human)	22	18	17	62	69	19	65.5	3.44737	2e-05
RS3A_HUMAN	RS3A_HUMAN	P61247	RPS3A	40S ribosomal protein S3a - Homo sapiens (Human)	1	5	3	29	34	3	31.5	10.5	2e-05
RS4X_HUMAN	RS4X_HUMAN	P62701	RPS4X	40S ribosomal protein S4, X isoform - Homo sapiens (Human)	3	3	4	50	48	3.33333	49	14.7	0
RS5_HUMAN	RS5_HUMAN	P46782	RPS5	40S ribosomal protein S5 - Homo sapiens (Human)	1	1	1	24	28	1	26	26	1e-05
RS6_HUMAN	RS6_HUMAN	P62753	RPS6	40S ribosomal protein S6 - Homo sapiens (Human)	3	1	0.9	26	13	1.63333	19.5	11.9388	4.67e-05
RS7_HUMAN	RS7_HUMAN	P62081	RPS7	40S ribosomal protein S7 - Homo sapiens (Human)	2	2	3	39	44	2.33333	41.5	17.7857	0
RS8_HUMAN	RS8_HUMAN	P62241	RPS8	40S ribosomal protein S8 - Homo sapiens (Human)	4	0.9	4	33	48	2.96667	40.5	13.6517	3.34e-06
RS9_HUMAN	RS9_HUMAN	P46781	RPS9	40S ribosomal protein S9 - Homo sapiens (Human)	9	6	5	43	35	6.66667	39	5.85	2e-05
RSMB_HUMAN	RSMB_HUMAN	P14678	SNRPB	Small nuclear ribonucleoprotein-associated proteins B and B' - Homo sapiens (Human)	2	0.9	4	18	19	2.3	18.5	8.04348	7.67e-05
RSSA_HUMAN	RSSA_HUMAN	P08865	RPSA	40S ribosomal protein SA - Homo sapiens (Human)	13	16	10	59	59	13	59	4.53846	1e-05
RUEL1_HUMAN	RUEL1_HUMAN	Q5VYJ4	NA	DELETED	0.9	0.9	0.9	10	7	0.9	8.5	9.44444	0.000463734
SATT_HUMAN	SATT_HUMAN	P43007	SLC1A4	Neutral amino acid transporter A - Homo sapiens (Human)	13	11	13	0.9	0.9	12.3333	0.9	0.072973	0.000163475
SC22B_HUMAN	SC22B_HUMAN	O75396	SEC22B	Vesicle-trafficking protein SEC22b - Homo sapiens (Human)	16	14	27	6	8	19	7	0.368421	0.000937478
SERA_HUMAN	SERA_HUMAN	O43175	PHGDH	D-3-phosphoglycerate dehydrogenase - Homo sapiens (Human)	8	7	10	32	28	8.33333	30	3.6	9.68e-05
SERPH_HUMAN	SERPH_HUMAN	P50454	SERPINH1	Serpin H1 precursor - Homo sapiens (Human)	6	11	14	67	58	10.3333	62.5	6.04839	3.34e-06
SET_HUMAN	SET_HUMAN	Q01105	SET	Protein SET - Homo sapiens (Human)	8	5	3	40	38	5.33333	39	7.3125	2e-05
SFPQ_HUMAN	SFPQ_HUMAN	P23246	SFPQ	Splicing factor, proline- and glutamine-rich - Homo sapiens (Human)	13	6	5	24	22	8	23	2.875	0.0004237
SFRS1_HUMAN	SFRS1_HUMAN	Q07955	SFRS1	Splicing factor, arginine/serine-rich 1 - Homo sapiens (Human)	12	7	12	1	2	10.3333	1.5	0.145161	0.000527123
SMD2_HUMAN	SMD2_HUMAN	P62316	SNRPD2	Small nuclear ribonucleoprotein Sm D2 - Homo sapiens (Human)	1	3	3	10	17	2.33333	13.5	5.78571	0.000270234
SMD3_HUMAN	SMD3_HUMAN	P62318	SNRPD3	Small nuclear ribonucleoprotein Sm D3 - Homo sapiens (Human)	3	0.9	1	20	20	1.63333	20	12.2449	3.67e-05
SNAA_HUMAN	SNAA_HUMAN	P54920	NAPA	Alpha-soluble NSF attachment protein - Homo sapiens (Human)	21	11	13	0.9	1	15	0.95	0.0633333	9.01e-05
SPTA2_HUMAN	SPTA2_HUMAN	Q13813	SPTAN1	Spectrin alpha chain, brain - Homo sapiens (Human)	113	117	97	16	7	109	11.5	0.105505	0
SPTB2_HUMAN	SPTB2_HUMAN	Q01082	SPTBN1	Spectrin beta chain, brain 1 - Homo sapiens (Human)	79	98	64	8	9	80.3333	8.5	0.105809	0
SSB_HUMAN	SSBP_HUMAN	Q04837	SSBP1	Single-stranded DNA-binding protein, mitochondrial precursor - Homo sapiens (Human)	7	6	3	17	17	5.33333	17	3.1875	0.000660571
STOM_HUMAN	STOM_HUMAN	P27105	STOM	Erythrocyte band 7 integral membrane protein - Homo sapiens (Human)	19	13	14	0.9	0.9	15.3333	0.9	0.0586957	9.01e-05
SYAC_HUMAN	SYAC_HUMAN	P49588	AARS	Alanyl-tRNA synthetase, cytoplasmic - Homo sapiens (Human)	4	11	7	0.9	0.9	7.33333	0.9	0.122727	0.00094415
SYEP_HUMAN	SYEP_HUMAN	P07814	EPRS	Bifunctional aminoacyl-tRNA synthetase [Includes: Glutamyl-tRNA synthetase - Homo sapiens (Human)	12	10	12	3	1	11.3333	2	0.176471	0.000530459
SYFB_HUMAN	SYFB_HUMAN	Q9NSD9	FARSB	Phenylalanyl-tRNA synthetase beta chain - Homo sapiens (Human)	2	1	0.9	8	10	1.3	9	6.92308	0.000600519
TALDO_HUMAN	TALDO_HUMAN	P37837	TALDO1	Transaldolase - Homo sapiens (Human)	6	7	4	27	29	5.66667	28	4.94118	7.67e-05
TBA1A_HUMAN	TBA1A_HUMAN	Q71U36	TUBA1A	Tubulin alpha-1A chain - Homo sapiens (Human)	52	57	62	308	298	57	303	5.31579	0
TBA1B_HUMAN	TBA1B_HUMAN	P68363	TUBA1B	Tubulin alpha-1B chain	0.9	0.9	0.9	85	60	0.9	72.5	80.5556	0
TBB1_HUMAN	TBB1_HUMAN	Q9H4B7	TUBB1	Tubulin beta-1 chain - Homo sapiens (Human)	17	9	24	70	71	16.6667	70.5	4.23	3.34e-06
TBB2A_HUMAN	TBB2A_HUMAN	Q13885	TUBB2A	Tubulin beta-2A chain - Homo sapiens (Human)	74	60	63	245	242	65.6667	243.5	3.70812	0
TBB2C_HUMAN	TBB2C_HUMAN	P68371	TUBB2C	Tubulin beta-2C chain - Homo sapiens (Human)	35	33	37	67	71	35	69	1.97143	0.000160139
TBB5_HUMAN	TBB5_HUMAN	P07437	TUBB	Tubulin beta chain - Homo sapiens (Human)	15	30	24	92	97	23	94.5	4.1087	0
TENA_HUMAN	TENA_HUMAN	P24821	TNC	Tenascin precursor - Homo sapiens (Human)	0.9	0.9	0.9	77	61	0.9	69	76.6667	0
TERA_HUMAN	TERA_HUMAN	P55072	VCP	Transitional endoplasmic reticulum ATPase - Homo sapiens (Human)	17	15	17	52	26	16.3333	39	2.38776	0.000236872
THIL_HUMAN	THIL_HUMAN	P24752	ACAT1	Acetyl-CoA acetyltransferase, mitochondrial precursor - Homo sapiens (Human)	11	11	14	0.9	0.9	12	0.9	0.075	0.000173483
TKT_HUMAN	TKT_HUMAN	P29401	TKT	Transketolase - Homo sapiens (Human)	28	35	31	94	63	31.3333	78.5	2.50532	3.34e-05
TLN1_HUMAN	TLN1_HUMAN	Q9Y490	TLN1	Talin-1 - Homo sapiens (Human)	75	77	75	21	17	75.6667	19	0.251101	3.34e-06
TPIS_HUMAN	TPIS_HUMAN	P60174	TPI1	Triosephosphate isomerase - Homo sapiens (Human)	17	1	33	147	132	17	139.5	8.20588	0
TPM3_HUMAN	TPM3_HUMAN	P06753	TPM3	Tropomyosin alpha-3 chain - Homo sapiens (Human)	0.9	0.9	0.9	8	8	0.9	8	8.88889	0.000610528
TPM3L_HUMAN	TPM3L_HUMAN	A6NL28	N/A	Putative tropomyosin alpha-3 chain-like protein	0.9	0.9	0.9	10	7	0.9	8.5	9.44444	0.000463734
TPP1_HUMAN	TPP1_HUMAN	O14773	TPP1	Tripeptidyl-peptidase 1 precursor - Homo sapiens (Human)	5	2	2	30	29	3	29.5	9.83333	2e-05
TPP2_HUMAN	TPP2_HUMAN	P29144	TPP2	Tripeptidyl-peptidase 2 - Homo sapiens (Human)	6	7	9	0.9	0.9	7.33333	0.9	0.122727	0.00094415
TRFE_HUMAN	TRFE_HUMAN	P02787	TF	Serotransferrin	0.9	0.9	0.9	63	69	0.9	66	73.3333	0
TXND5_HUMAN	TXND5_HUMAN	Q8NBS9	TXNDC5	Thioredoxin domain-containing protein 5 precursor - Homo sapiens (Human)	6	3	1	17	20	3.33333	18.5	5.55	0.000146794
TYRP1_HUMAN	TYRP1_HUMAN	P17643	TYRP1	5,6-dihydroxyindole-2-carboxylic acid oxidase precursor - Homo sapiens (Human)	24	25	39	0.9	0.9	29.3333	0.9	0.0306818	3.34e-06
U2AF2_HUMAN	U2AF2_HUMAN	P26368	U2AF2	Splicing factor U2AF 65 kDa subunit - Homo sapiens (Human)	2	1	0.9	16	15	1.3	15.5	11.9231	7.67e-05
UBE1_HUMAN	UBA1_HUMAN	P22314	UBA1	Ubiquitin-activating enzyme E1 - Homo sapiens (Human)	28	27	14	110	119	23	114.5	4.97826	0
UBIQ_HUMAN	UBIQ_HUMAN	P62988	RPS27A	Ubiquitin - Homo sapiens (Human)	15	17	15	40	45	15.6667	42.5	2.71277	0.000100087
UGGG1_HUMAN	UGGG1_HUMAN	Q9NYU2	UGCGL1	UDP-glucose:glycoprotein glucosyltransferase 1 precursor - Homo sapiens (Human)	7	8	12	0.9	0.9	9	0.9	0.1	0.000527123
UTRO_HUMAN	UTRO_HUMAN	P46939	UTRN	Utrophin - Homo sapiens (Human)	15	5	6	1	0.9	8.66667	0.95	0.109615	0.000560485
VATA_HUMAN	VATA_HUMAN	P38606	ATP6V1A	Vacuolar ATP synthase catalytic subunit A - Homo sapiens (Human)	18	16	33	3	1	22.3333	2	0.0895522	3e-05
VATB2_HUMAN	VATB2_HUMAN	P21281	ATP6V1B2	Vacuolar ATP synthase subunit B, brain isoform - Homo sapiens (Human)	9	33	14	5	3	18.6667	4	0.214286	0.000213518
VIME_HUMAN	VIME_HUMAN	P08670	VIM	Vimentin - Homo sapiens (Human)	99	122	113	1024	989	111.333	1006.5	9.04042	0
VPP1_HUMAN	VPP1_HUMAN	Q93050	ATP6V0A1	Vacuolar proton translocating ATPase 116 kDa subunit a isoform 1 - Homo sapiens (Human)	14	14	19	0.9	3	15.6667	1.95	0.124468	0.000163475
